# Supplementary material
Source: PubMed Central journal article supplement (PMC4641038)
Supplement: NIHMS732344-supplement-Supplemental.pdf [file NIHMS732344-supplement-Supplemental.pdf]

## Supplementary Materials for

### Immunological mechanisms of the antitumor effects of supplemental oxygenation

Stephen M. Hatfield, Jorgen Kjaergaard, Dmitriy Lukashev, Taylor H. Schreiber, Bryan Belikoff, Robert Abbott, Shalini Sethumadhavan, Phaethon Philbrook, Kami Ko, Ryan Cannici, Molly Thayer, Scott Rodig, Jeffrey L. Kutok, Edwin K. Jackson, Barry Karger, Eckhard R. Podack, Akio Ohta, Michail V. Sitkovsky\*

\*Corresponding author. E-mail: m.sitkovsky@neu.edu

Published 4 March 2015, *Sci. Transl. Med.* **7**, 277ra30 (2015)

DOI: 10.1126/scitranslmed.aaa1260

#### The PDF file includes:

##### Materials and Methods

Fig. S1. The tumor-regressing effects of respiratory hyperoxia are lost in  $c\gamma/Rag-2^{-/-}$  mice.

Fig. S2. ROS scavenger does not prevent the antitumor effects of respiratory hyperoxia.

Fig. S3. Respiratory hyperoxia reverses hypoxia-adenosinergic inhibition of NK cells.

Fig. S4. Respiratory hyperoxia does not further improve the activity of tumor-reactive A2AR<sup>-/-</sup> T cells.

Fig. S5. CD8 and CD4 T cells avoid hypoxic TME.

Fig. S6. T<sub>regs</sub> with higher expression of CTLA-4 are more hypoxic.

Fig. S7. CD8 T cells from TDLN are enriched after culture activation for adoptive transfer.

Fig. S8. Breathing 60% oxygen increased IFN- $\gamma$  production by CD8 T cells in the lung TME.

Table S1. Immunostimulating cytokines/chemokines increased by respiratory hyperoxia.

Table S2. Full list of primer sets in RT-PCR arrays.

## Supplementary Materials

### Supplementary Materials and Methods

**Adoptive NK cell Transfer.** For adoptive NK cell transfer experiments and *in vitro* analyses, splenocytes from naïve mice were isolated and cultured with high dose (6000 U/ml) IL-2 for 6 days. To exclude other lymphocytes, only adherent cells were retained and replenished with IL-2, every 2 days. Activated NK cells were isolated, resuspended in HBSS, and infused ( $10 \times 10^6$ ) into mice with 4-day established B16 lung tumors. Mice were placed in either 60% or 21% oxygen, and the number of tumor nodules per lung was assessed after 21 days.

**LPS-induced lung injury.** LPS was intra-tracheally injected at a dose of 4 mg/kg body weight in a total volume of 50  $\mu$ l per mouse under isoflurane anesthesia. After IT injection of LPS into unconscious but spontaneously breathing mice, animals were held in an upright position for 15 s and then briefly shaken in all directions to ensure homogenous fluid dispersion in the lung. Experimental mice were injected i.p. daily for 48 h with 150 mg/kg N-acetylcysteine in HBSS. After 48 h, mice were sacrificed, their lungs were lavaged with 500  $\mu$ l PBS, and cells were incubated for 15 min at 37°C with 10  $\mu$ m dichlorofluoresceine diacetate (DDF-DA, Molecular Probes) as a reactive oxygen species detection reagent. Flow cytometry was used to detect the mean fluorescent intensity of 2' 7'-dichlorofluoresceine in LPS control and NAC-treated mice.

**Supplementary Figures**

**Fig. S1. The tumor-regressing effects of respiratory hyperoxia are lost in *cy/Rag-2<sup>-/-</sup>* mice.**

Comparison of *cy/Rag-2<sup>-/-</sup>* and wild type mice breathing 21% and 60% oxygen are provided in (A), showing an image of each lung and direct enumeration of the number of MCA205 lung tumors (n = 5 mice/group, P = 0.0001), (B) calculations comparing the total tumor-bearing lung weight (n = 5 mice/group, P = 0.0002), (C) representative image of H/E-stained lung sections used to quantify percent tumor saturation versus normal tissue (shown are the areas of tumor tissue outlined in pink on lung sections from tumor-bearing mice breathing 21% or 60% oxygen), and (D) the calculation of the ratio between area occupied by tumor versus normal lung tissue on lung sections (n = 5 mice/group, P = 0.004).

S1 A

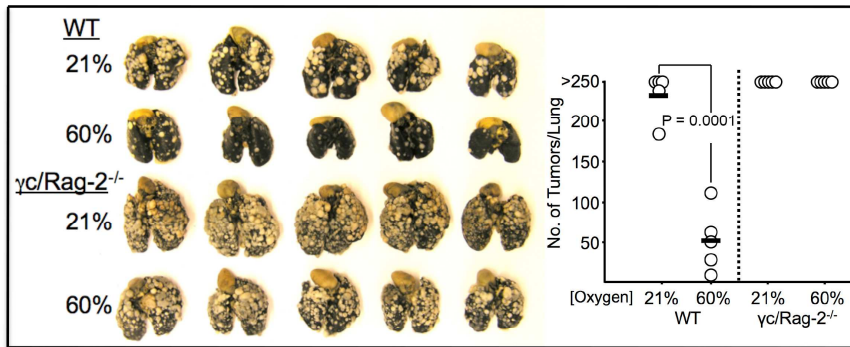

B

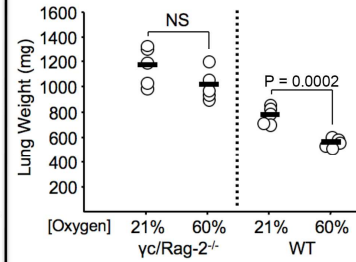

C

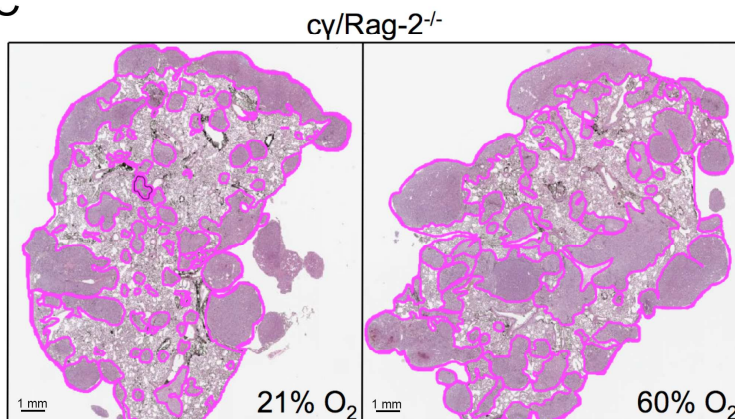

D

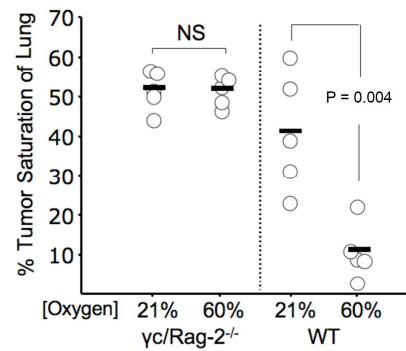

**Fig. S2. ROS scavenger does not prevent the antitumor effects of respiratory hyperoxia.**

**A.** N-acetylcysteine inhibits the production of reactive oxygen species in an LPS-induced lung injury model, where ROS have been implicated in tissue damage (26-29). Flow cytometric assays demonstrate that NAC (150 mg/kg) reduces the mean fluorescent intensity of DCF, a reactive oxygen species indicator (ROS Detection Reagents, Molecular Probes). The average mean fluorescent intensity of DCF was 452 in LPS control mice versus 174 in LPS mice treated with NAC (n = 4 mice/group, P = 0.001). Dotted line represents unstained control.

**B.** N-acetylcysteine was unable to interfere with the tumor-regressing effects of 60% oxygen in mice with established tumors treated daily with the same dose (150 mg/kg, i.p.) of the broad ROS scavenger, starting immediately before respiratory hyperoxia (n = 5 mice/group, P = 0.0001).

S2

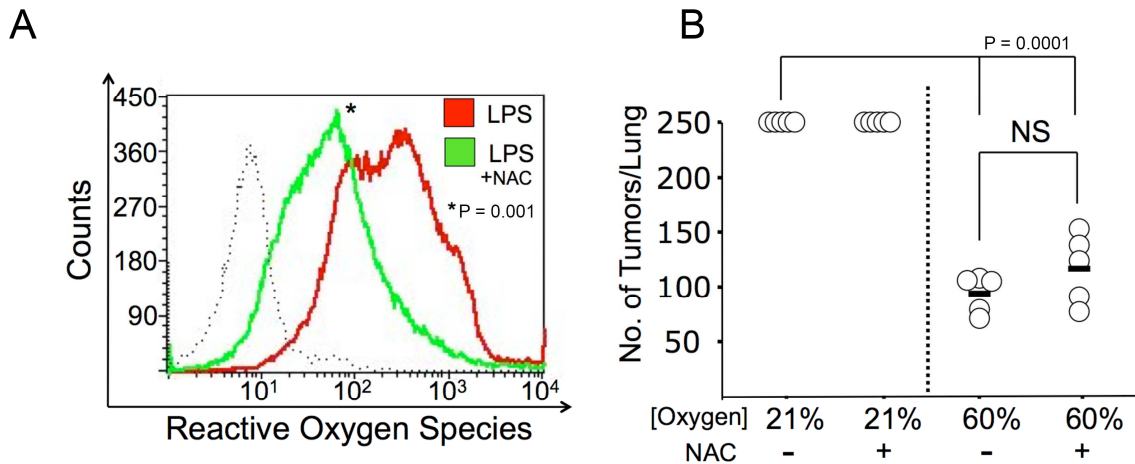

**Fig. S3. Respiratory hyperoxia reverses hypoxia-adenosinergic inhibition of NK cells.**

**A, B.** Expression of (A) NKG2D and (B) CD69 on NK cells is reduced by hypoxia and A2 adenosine receptor activation in in vitro experiments. Interleukin-2-activated NK cells were cultured in vitro in 1% or 21% oxygen or with and without 10  $\mu$ m CGS (A2AR agonist) or NECA (A2AR/A2BR agonist) for 48 h. The expression levels were determined by the mean fluorescent intensity of NKG2D and CD69 as measured by flow cytometry (n = 4/group). [A. Average MFI for NKG2D: Control = 139; NECA = 118 (P = 0.006), 1% O<sub>2</sub> = 76 (P = 4.3x10<sup>-6</sup>). B. Average MFI for CD69: Control = 201; CGS = 150 (P = 0.015), 1% O<sub>2</sub> = 153 (P = 6.1x10<sup>-5</sup>)].

C. After 24 and 48 h incubation of activated NK cells with IL-2, levels of IFN- $\gamma$  were measured by ELISA (R&D Systems) (n = 4/group, P = 1.9x10<sup>-7</sup> for CGS and P = 2.5x10<sup>-7</sup> for 1% O<sub>2</sub>).

D. Adoptive transfer of activated NK cells in combination with respiratory hyperoxia enables stronger regression of 4-day established B16 pulmonary tumors [n = 5 mice/group; averages represented as horizontal bars, P = 0.0002 (21% O<sub>2</sub>+NK vs. 60% O<sub>2</sub>+NK) and P = 0.001 (60% O<sub>2</sub> vs. 60% O<sub>2</sub>+NK)]. For adoptive NK cell transfer experiments and in vitro analysis, splenocytes from naïve mice were isolated and cultured with high dose (6000 U/ml) IL-2 for 6 days. To exclude other lymphocytes, only adherent cells were retained and replenished with IL-2 every 2 days. Activated NK cells were isolated, resuspended in HBSS, and infused (10x10<sup>6</sup>) into mice with 4-day established B16 lung tumors. Mice were placed in either 60% or 21% oxygen, and the number of tumor nodules per lung was assessed after 21 days.

### S3

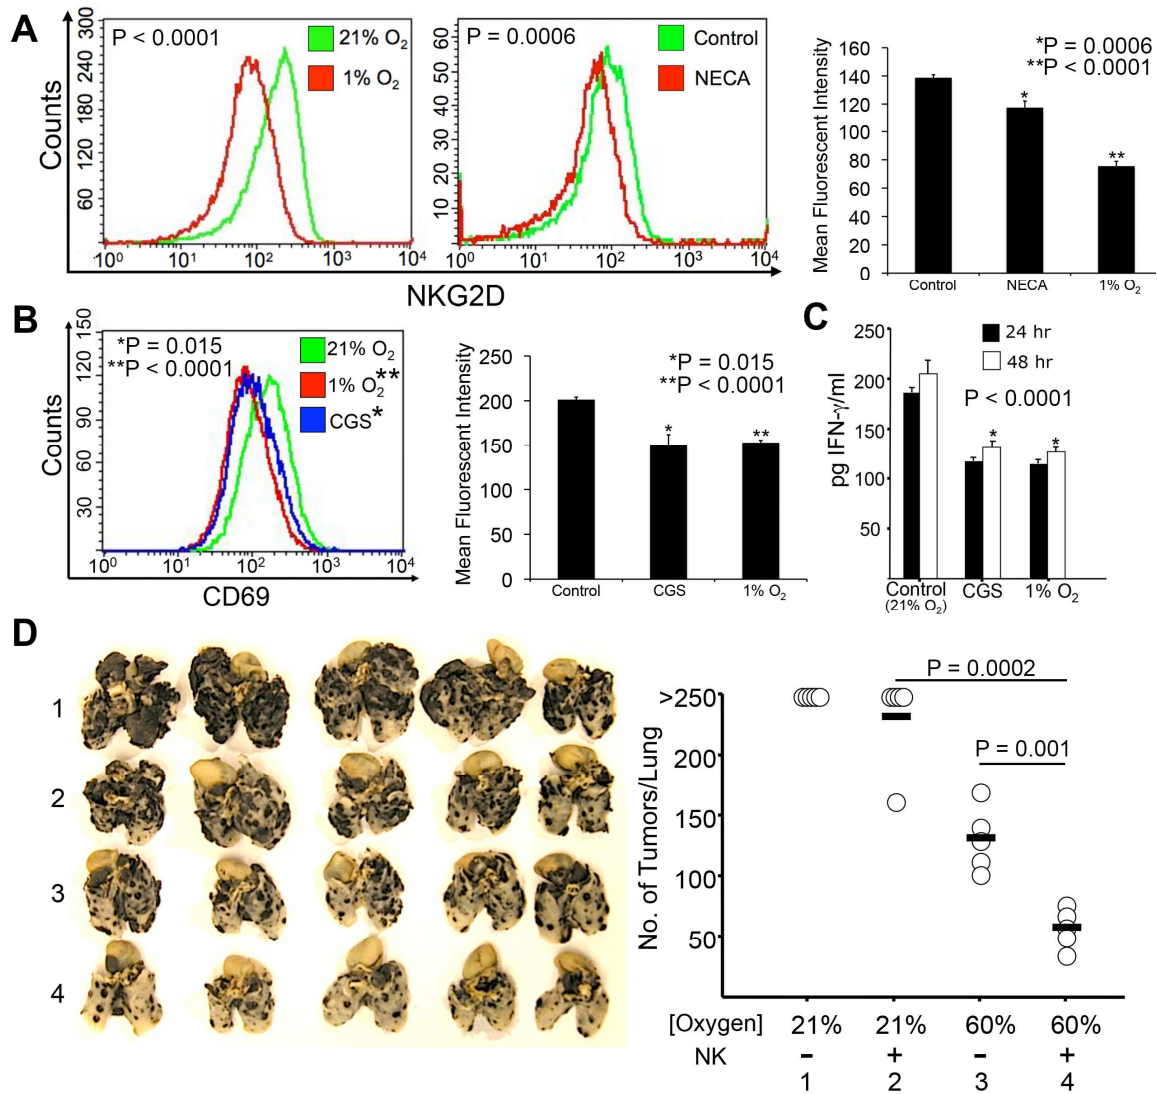

**Fig. S4. Respiratory hyperoxia does not further improve the activity of tumor-reactive A2AR<sup>-/-</sup> T cells.** Adoptively transferred WT or A2AR<sup>-/-</sup> TDLN T cells ( $5 \times 10^6$ ) were transferred into *cγ/Rag-2<sup>-/-</sup>* mice with 11-day established MCA205 lung tumors, and the mice were placed in either 21% or 60% oxygen. To overcome inherent difficulties in quantitation of the number of lung tumor foci in control *cγ/Rag-2<sup>-/-</sup>* mice, where tumors grow rapidly, tumor burden was assessed using dry lung weight on day 21 [(n = 5 mice/group, averages represented as horizontal bars, P = 0.001(WT 21% → 60%)].

S4

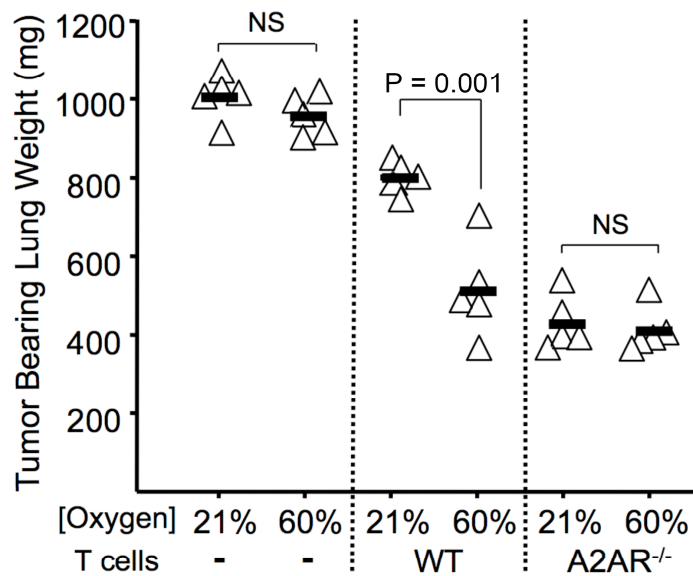

**Fig. S5. CD8 and CD4 T cells avoid hypoxic TME.**

**A.** Fluorescence micrographs (scale bar = 100  $\mu$ m) of the preferential localization of CD8 and CD4 T cells (red) in normoxic TME (blue, DAPI) compared to hypoxic TME (green, Hypoxyprobe) of intra-dermal MCA205 tumors.

**B.** Comparison of the number of CD8 or CD4 T cells in normoxic versus hypoxic TME (n = 3 mice; \*P = 0.001 comparing CD4 T cells from normoxic and hypoxic areas, \*\*P = 0.0002 comparing CD8 T cells from normoxic and hypoxic areas).

**C.** Fluorescence micrograph (scale bar = 1 mm) of CD8 T cells avoiding hypoxic areas of an intradermal tumor section using a Zeiss LSM 710 confocal microscope, stitched using Zeiss Zen Blue Imaging software.

S5 A

### Intradermal Tumors

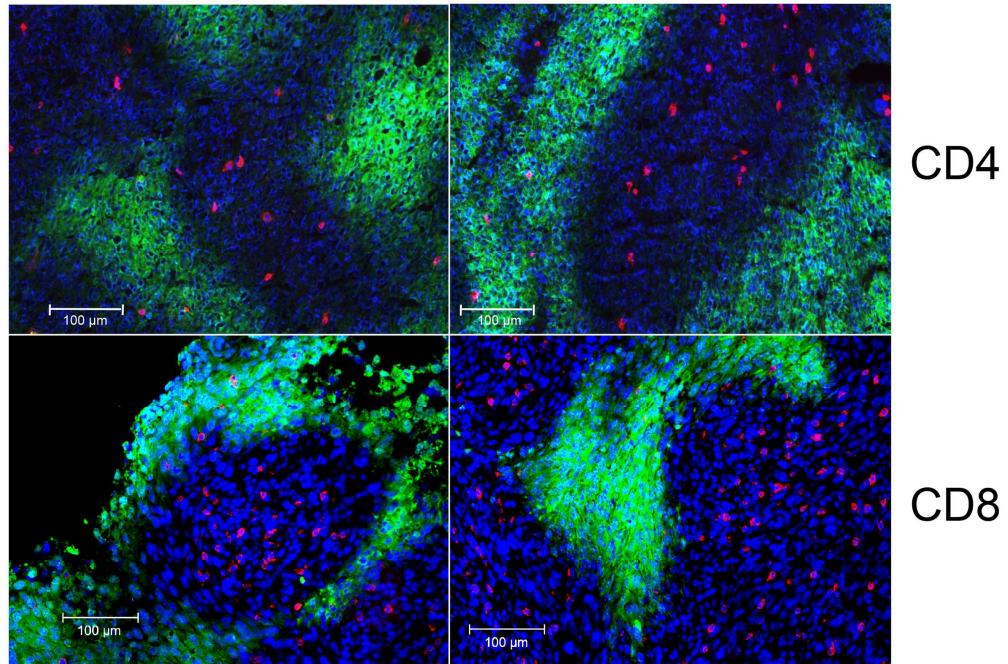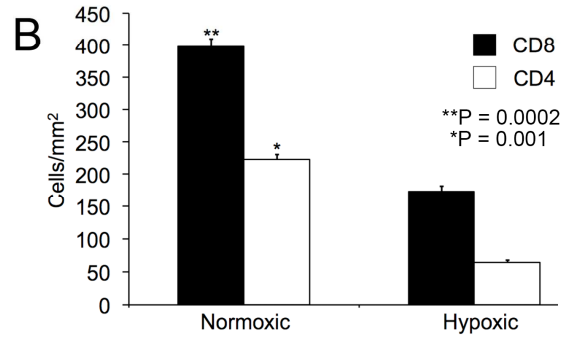

S5 C

Intradermal Tumor

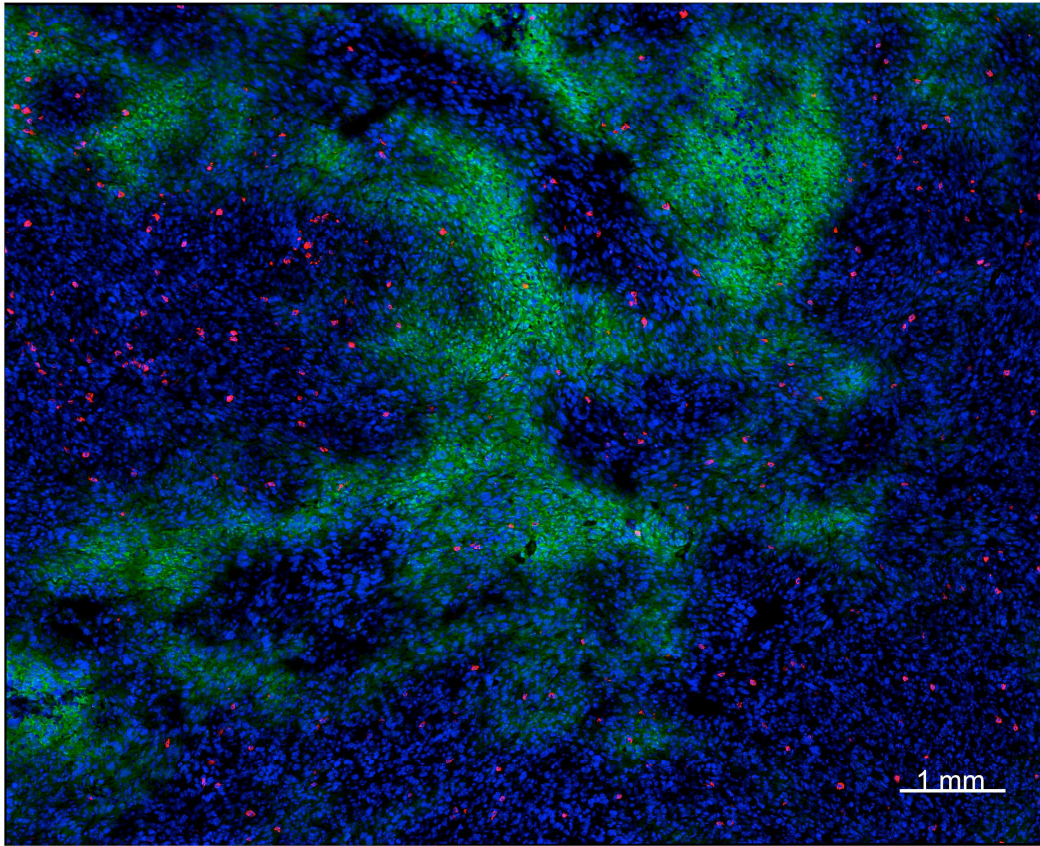



**Fig. S6. T<sub>regs</sub> with higher expression of CTLA-4 are more hypoxic.** CTLA-4<sup>High</sup> T regs from the spleen of tumor-bearing mice were also Hypoxyprobe<sup>High</sup>, reflecting in vivo exposure to deeper levels of hypoxia. Hyperoxic breathing decreased the number of CTLA-4<sup>High</sup> T regs compared to mice breathing 21% oxygen (P = 0.0001, n = 4 mice/group).

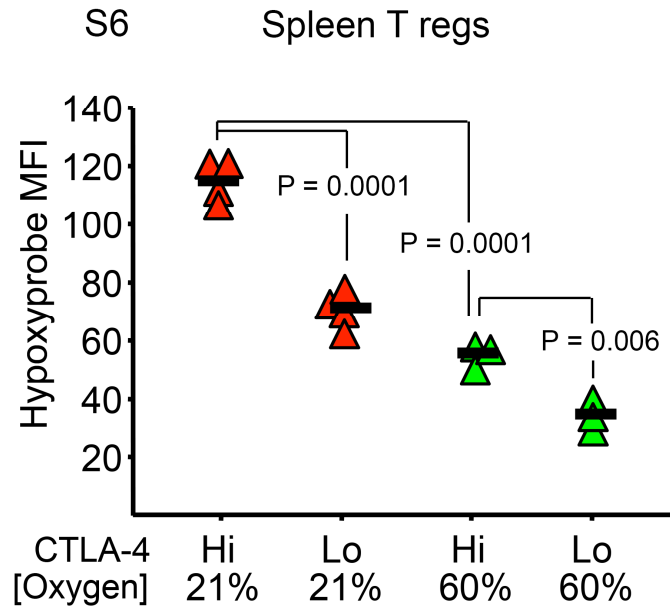

**Fig. S7. CD8 T cells from TDLN are enriched after culture activation for adoptive transfer.** In a typical preparation, adoptively-transferred cells consist of approximately 70-80% CD8<sup>+</sup> and 15-20% CD4<sup>+</sup> cells. Shown in red are the percentages of CD8 (75.8) and CD4 (11.6) T cells after culture activation.

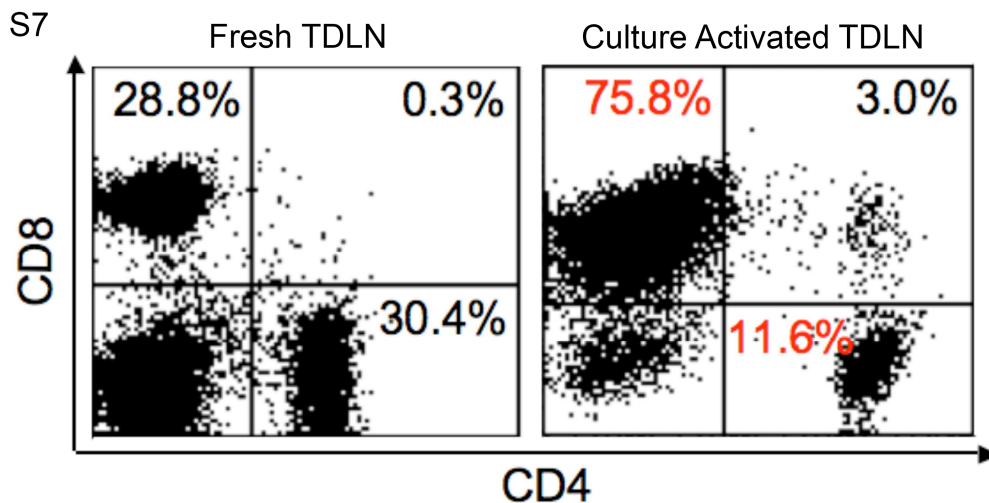

**Fig. S8. Breathing 60% oxygen increased IFN- $\gamma$  production by CD8 T cells in the lung TME.** After 4 days of respiratory hyperoxia, adoptively transferred CD8<sup>+</sup> (Thy 1.1<sup>+</sup>) and endogenously developed CD8<sup>+</sup> (Thy 1.2<sup>+</sup>) demonstrate increased IFN- $\gamma$  production. The average number of CD8 T cells (Thy 1.1<sup>+</sup> and Thy 1.2<sup>+</sup>) expressing IFN- $\gamma$  in mice treated with respiratory hyperoxia was 42% compared to 32% in mice breathing ambient oxygen (n = 3 mice/group, P = 0.002).

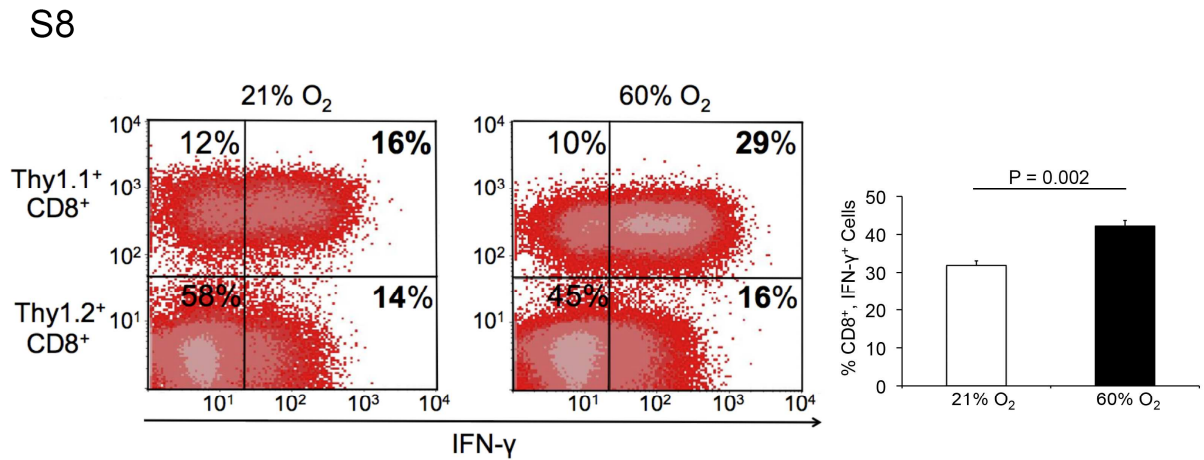

**Table S1. Immunostimulating cytokines/chemokines increased by respiratory hyperoxia.** The fold-increase in the RNA levels and the exact P-value for each gene is listed.

| Cytokine/Chemokine | Fold-Increase | P value     |
|--------------------|---------------|-------------|
| IL-12a             | 35.19703181   | 0.001361776 |
| IL-2               | 2.05436743    | 0.052619196 |
| CXCL9              | 8.57769879    | 0.029648982 |
| CXCL10             | 2.478411813   | 0.012345832 |
| CXCL11             | 2.2332708     | 0.037631946 |
| CCL3               | 6.51554072    | 0.007171583 |
| CCL9               | 13.47993625   | 0.002393171 |
| CCL20              | 26.64894485   | 0.015096529 |
| CCL26              | 17.74878418   | 0.023460324 |
| CCR3               | 4.0747839     | 0.045264066 |

**Table S2. Full list of primer sets in RT-PCR arrays.**

Taylor Schreiber  
Primer Designs for Chemokine and Cytokine RT-PCR (mouse)

**CCL4**

>NM\_013652 NM\_013652 Mus musculus chemokine (C-C motif) ligand 4 (Ccl4), mRNA. 3/2007

```
AGCACAGCACTCGGCCAGCTTCTGAAGCTTCTGGGCCCTGCAGTCCCAGCTCTGTGCAAA
CCTAACCCCGAGCAACACCATGAAGCTCTGCGTGTCTGCCCTCTCTCTCTCTCTTGTCTCGT
GGCTGCCTTCTGTGCTCCAGGGTTCTCAGCACCAATGGGCTCTGACCCTCCCCTTCTCTG
CTGTTTCTCTTACACCTCCCAGGCTTTCACAGAAGCTTTGTGATGGATTACTATGAGAC
CAGCAGTCTTTGCTCCAAGCCAGCTGTGGTATTCTGACCAAAAAGAGGCAGACAGATCTG
TGCTAACCCAGTGAGCCCTGGGTCACTGAGTACATGAGTGACTTGGAGTTGAACTGAGC
AGCTCCAGCGGCAGGGCAGGAGGACCACTTCAGGAGAGGCCTCCTCAGCCCTGATGCTT
CTCACTGAGAAGCGTCTTGTCTCCTCACGTTTCAGATTTCTGCCCCCTTCTTAATTTAA
ATCTCTGTGTAGACTTTGTTTTGTTTTTGGGGGAGTATTATTTCTATTATTTATGTTTT
TAGTTATAGGACGCGTGTCTCCCATGGAGATGGTCCACCATTGCTGTTTCTCTGCTATTG
TGGATATGACTGTGAAATTGATTTTCATGCATTTTCATAATAAAATCTTTCTTTAAGATATA
AAAAAAAAAAAAAAAA
```

|         | Sequence                | Tm |
|---------|-------------------------|----|
| Forward | TCTGCCCTCTCTCTCTCTTGTCT | 62 |
| Reverse | TTGGTGCTGAGAACCCTGGA    | 60 |

**CCL17**

>NM\_011332 NM\_011332 Mus musculus chemokine (C-C motif) ligand 17 (Ccl17), mRNA. 12/2006

```
CCCATGAAGACCTTCACCTCAGCTTTTGGTACCATGAGGTCACCTTCAGATGCTGCTCCTG
GCTGCTCTGCTTCTGGGGACTTTTCTGCAGCATGCCAGAGCTGCTCGAGCCACCAATGTA
GGCCGAGAGTGTGCTGCTGGATTACTTCAAAGGGGCCATTCTATCAGGAAGTTGGTGAGC
TGGTATAAGACCTCAGTGGAGTGTTCAGGGATGCCATCGTGTCTTCTGACTGTCCAGGGC
AAGCTCATCTGTGCAGACCCCAAAGACAAAACATGTGAAGAAGGCCATCAGATTGGTGAAA
AACCCAAGGCCATGACCTTCCCCTGAGGCATTTGGAGACGCCAGGGCTGCTGTCCATGG
TTTCAACATAAAAACGGCCTGTGACCAGCAGAGCCAAAGAGCAGCCACAGAGCAGAAGTCC
CTGTTCCCTTTTTTATGGACTCTTATGCACTACAGGCGAACACAAAAAAGCAACGGAA
TAAAGCCTTCCCTCCTCAAAAAAAAAAAAAAAAAAAAAAAAAAAAAAAAAAAAAAAAAAAAA
AAAAAAAAAAAAAAAAAAAAAAAAAAAAAAAAAAAAAAAAAAAAAAAAAAAAAAAAAAAA
```

|         | Sequence               | Tm |
|---------|------------------------|----|
| Forward | TGCTCTGCTTCTGGGGACTTTT | 61 |
| Reverse | TCGGCCTACATTGGTGGCT    | 60 |

**IL4**

>NM\_021283 NM\_021283 Mus musculus interleukin 4 (Il4), mRNA. 3/2007

```
GGATCCCCGGGCAGAGCTGGGGGGGATTTGTTAGCATCTCTTGATAAACTTAATTGTCT
CTCGTCACTGACGGCACAGAGCTATTGATGGGTCTCAACCCCGAGCTAGTTGTCATCCTG
CTCTTCTTTCTCGAATGTACCAGGAGCCATATCCACGGATGCGACAAAAATCACTTGAGA
GAGATCATCGGCATTTTGAACGAGGTCACAGGAGAAGGGACGCCATGCACGGAGATGGAT
GTGCCAAACGTCCTCACAGCAACGAAGAACCACAGAGAGTGAGCTCGTCTGTAGGGCT
TCCAAGGTGCTTCGCATATTTTATTTAAACATGGGAAAACCTCCATGCTTGAAGAAGAAC
TCTAGTGTCTCATGGAGCTGCAGAGACTCTTTCGGGCTTTTCGATGCCTGGATTTCATCG
ATAAGCTGCACCATGAATGAGTCCAAGTCCACATCACTGAAAGACTTCCCTGGAAAGCCTA
AAGAGCATCATGCAAAATGGATTACTCGTAGTACTGAGCCACCATGCTTTAACTTATGAAT
TTTTAATGGTTTTATTTTAAATATTTATATATTTATAATTCATAAAAATAAAATATTTGTAT
AATGT
```

|  | Sequence | Tm |
|--|----------|----|
|  |          |    |

|         |                         |    |
|---------|-------------------------|----|
| Forward | TTGAACGAGGTCACAGGAGAAGG | 61 |
| Reverse | GAGGACGTTTGGCACATCCA    | 60 |

### IL13

>NM\_008355 NM\_008355 Mus musculus interleukin 13 (Il13), mRNA. 1/2007

GACAAGCCAGCAGCCTAGGCCAGCCCACAGTTCTACAGCTCCCTGGTTCTCTCACTGGCT  
 CTGGGCTTCATGGCGCTCTGGGTGACTGCAGTCCTGGCTCTTGCTTGCCCTGGTGGTCTC  
 GCCGCCCCAGGGCCGGTGCCAAGATCTGTGTCTCTCCCTCTGACCCTTAAGGAGCTTATT  
 GAGGAGCTGAGCAACATCACACAAGACCAGACTCCCCTGTGCAACGGCAGCATGGTATGG  
 AGTGTGGACCTGGCCGCTGGCGGGTCTGTGTAGCCCTGGATTCCCTGACCAACATCTCC  
 AATTGCAATGCCATCTACAGGACCCAGAGGATATTGCATGGCCTCTGTAACCGCAAGGCC  
 CCCACTACGGTCTCCAGCCTCCCCGATACCAAAAATCGAAGTAGCCCACTTTATAACAAAA  
 CTGCTCAGCTACACAAAGCAACTGTTTTCGCCACGGCCCCCTTCTAATGAGGAGAGACCATC  
 CCTGGGCATCTCAGCTGTGGACTCATTTTTCTTTCTCACATCAGACTTTGCTGGGGAGAG  
 GCAGGGAGGAGGGTTGAGGAGGAAGGGAGATGCCTCAGCTTTGGCCTCAGCCTGCAGCTGC  
 CTGCCTAGTGCTCAGGGTCTCAGCCTGGCAACACCCCCACCCCCACCCCCACCCCCGCCGC  
 CCCATCCCATCCCTACAGAAAAGTGCAGCAAGACCGTGAGTCCAGCCTGTGGCCTGGTCC  
 ACACAGGGCAACTGAGGCAGGCAGCAGCTTGAGCACATTTCTTTGATCTTATTTATTA  
 TGGTTGTGTGTTATTTAAATGAGTCTGTGAGTATCCCGGTGGGGACATGGTTTGCTGCCT  
 ATGCCCTGGGGGCTCCAGCATTGAAGCAGTGGGCTCTGGGGTCCCTGGCAATATTAATGT  
 ATACATAACTCTGTACCTCACTGTAGCCTCCAGGTCTCACCCAGGCAGGGAGATGGGA  
 GGGGAGGCCAGAGCAACACTCCTGTCTGCCACGGCAGCAACCAGCCCTCAGCCATGAAAT  
 AACTTATTGTTTTGTTCTTATATTTAAAGTATTTAAATAGCTTAGCAAAGAGTTAATAATA  
 TATGGAAGAATGGCCTGTTACACTCAAGGTGATGTGTAGTGAATGGGGGGAGGGTGGTGG  
 GTTTGTCACTGAACAAACTTTTCATTGACTGTCAAAGTAAAGTAAAGATGGT  
 GACAGAT

|         | Sequence               | Tm |
|---------|------------------------|----|
| Forward | CGCTGGCGGGTTCTGTG      | 61 |
| Reverse | ATGGCATTGCAATTGGAGATGT | 60 |

### CCL8

>NM\_021443 NM\_021443 Mus musculus chemokine (C-C motif) ligand 8 (Ccl8), mRNA. 11/2006

GAATTCGGCAGGAGGATTGAGAGGACGCTAGCCTTCACTCCAAAATCTTTGCCCTTCAAC  
 ATGAAGATCTACGCAGTGCTTCTTTGCCCTGCTGCTCATAGCTGTCCCTGTCAGCCCAGAG  
 AAGTGACTGGCCAGATAAAGCTCCAGTCACCTGCTGCTTTTATGTAATAAAGCTGAAG  
 ATCCCCCTTCGGGTGCTGAAAAGCTACGAGAGAATCAACAATATCCAGTGCCCCATGGAA  
 GCTGTGGTTTTTCCAGACCAAGCAGGGTATGTCTCTCTGTGTAGACCCCCACACAGAAGTGG  
 GTCAGTGAGTACATGGAGATCCTTGACCAGAAGTCTCAAATTTCTGCAGCCTTGAACCTTC  
 ACACCTGAGTTAAGAGACAGCCAAAGCTGGAAGTTCTCCCCTAATCTTCTCCAGGCAGAG  
 AGATGTTACAAGCAGATGGTGCCTGGGCTGCGTGTCTTCTCATCCTTGTCTGTTATATGA  
 ACAACTGAAATAAAAGCTTACACTGATTTGCAAATT

|         | Sequence               | Tm |
|---------|------------------------|----|
| Forward | GGCCAGATAAAGGCTCCAGTCA | 60 |
| Reverse | GCACCCGAAGGGGGATCTT    | 62 |

### CCL9

>NM\_011338 NM\_011338 Mus musculus chemokine (C-C motif) ligand 9 (Ccl9), mRNA. 3/2007

ACTGCACACTGTTCCCTCTCTTAGAACTAGCATGTTGGGTGTTATGTAGTCAAAGGAGGG  
 CATTATGAGCTGTACCCCAGGGACTTCTTGATCCTCTTACATGTATAAATAGCAAGACCG  
 GGCCAGGAACAGCAAGCAGTCTGAAGGCCAGCTGGGTCTGCCCACTAAGAAGATGAAGCC  
 TTTTCATACTGCCCTCTCCTTCTTCACTTCTTACAAGTCTTGGAAATCTGGGCCAGAT  
 CACACATGCAACAGAGACAAAAGAAGTCCAGAGCAGTCTGAAGGCACAGCAAGGGCTTGA  
 AATTGAAATGTTTTACATGGGCTTTCAAGACTCTTCAGATTGCTGCCTGTCTATAACTC



GACATGTTTTTTCATCACCTGCTTACGATTGATAGATACCTAGCTGTTGTCCATGTGCTG  
 TTTGCCCTGAGAGCCCGACTGTCACCTTTTGGCATCATCAGTAGCATCATTACCTGGGTC  
 CTGGCTGCCTTGGTTTTCTATTCTTGTCTCTATGTTTTCAAATCCCAGATGGAGTTCACT  
 TACCATACTGCAGAGCAATTTTGCCAGGAAGAGCCTGATACGTTTTTTAAGGTTTCAG  
 GCTCTAACAAATGAACATCCTTGGGCTAATTTTGCCTCTGTTGGCCATGATTATCTGCTAC  
 ACACGGATCATCAATGTTTTACACAGAAGACCCAATAAGAAGAAGGCCAAAAGTCATGCGC  
 CTGATTTTTTGTATTACGCTTCTCTTCTTCTTCTTGGCCCTTATTATCTGGCTGCC  
 TTTGTTTTCTGCTTTTGAAGACGTCCTATTACCCCTAGTTGTTTTGAGAAGCCAACAGGTG  
 GACCTGTCCTTGATGATAACTGAAGCACTTGCCTACACCCACTGCTGTGTCAACCCAGTC  
 ATTTATGTCTTTGTGGGTAAACGGTTCGGGAAGTACCTCTGGCAGTTGTTTTGGAGGCAT  
 ACAGCTATAACCTGCCACAATGGCTGCCCTTTCTCTCGGAGGACAGAGCACAGAGGGCC  
 AGTGCCACGCCTCCATCCACAGTGGAATTGAGACCTCTGCCGACTTATAATTCAGACCC  
 TGGACGCCAACAAAGGCC

|         | Sequence               | Tm |
|---------|------------------------|----|
| Forward | CACTTGCCTACACCCACTGCTG | 62 |
| Reverse | CCGGAACCGTTTACCCACA    | 60 |

### CXCL4

>NM\_019932 NM\_019932 Mus musculus chemokine (C-X-C motif) ligand 4 (Cxcl4), mRNA. 11/2006

ACTTAAGAGCCCTAGACCCATTTCTCAAGGTAGAACTTTACTCACTATAGGGCTCCAGT  
 GGCCGACCGGGCAGGTCTTGACATGAGCGTCGCTGCGGTGTTTTGAGGCCTCCGGCCCAG  
 TCCTGAGCTGCTGCTTCTGGGCCTGTTGTTTTCTGCCAGCGGTGGTTGCTGTCACCAGCGC  
 TGGTCCCGAAGAAAGCGATGGAGATCTTAGCTGTGTGTGTGTGAAGACCATCTCCTCTGG  
 GATCCATCTTAAGCACATCACCAGCCTGGAGGTGATCAAGGCAGGACGCCACTGTGCGGT  
 TCCCCAGCTCATAGCCACCCTGAAGAATGGGAGGAAAATTTGCCTGGACCGGCAAGCACC  
 CCTATATAAGAAAAGTAATCAAGAAAATCCTGGAGAGTTAGGTATCAGCTGCCTAAATGTC  
 AATTGTGTTACAAGACTCCTGGAATCTTGTCTACTTTTTAATGTAAGTCAATCTTCCGAT  
 GTTTATATTATCCTTCAAGATTTAAATAAATGCATTGAACCAAAG

|         | Sequence            | Tm |
|---------|---------------------|----|
| Forward | GCTGCTTCTGGGCCTGTTG | 61 |
| Reverse | TTCTTCGGGACCAGCGCT  | 60 |

### CCR3

>NM\_009914 NM\_009914 Mus musculus chemokine (C-C motif) receptor 3 (Ccr3), mRNA. 1/2007

GGTTATCTCTGTTTTATTAGCAGTGAACTTAAAGTTACTACTGGACTCATAAAGGACTTA  
 GCAAAATTCACCAGAGACAAGTAGAATGGCATTCAACACAGATGAAATCAAGACTGTGGT  
 TGAAAGCTTTGAGACCACACCCTATGAATATGAGTGGGCACCACCCTGTGAAAAAGTCAG  
 AATCAAAGAGCTGGGGTCATGGCTCCTGCCTCCACTGTACTCCCTGGTGTTCATCATCGG  
 CCTCCTGGGCAACATAATGGTTGTGTTGATCCTCATAAAGTACAGGAAGCTACAAATTAT  
 GGCTAATATCTACCTGTTCAACTTGGCAATTTCTGACCTGCTCTTTCTCTTCACTGTCCC  
 ATTTCTGGATTCACTATGTTCTGTGGAATGAGTGGGGTTTTGGCCACTACATGTGCAAAAT  
 GCTGTCTGGGTTTTATTACCTGGCCTTGTACAGCGAGATCTTTTTTCATCATTCTGCTGAC  
 AATTGACAGATACCTGGCTATCGTCCATGCTGTGTTTGGCCCTTCGAGCCCGAACTGTGAC  
 TTTTGCTACTATCACCAGTATCATTACCTGGGGCCTTGCAGGACTGGCAGCATTGCCTGA  
 ATTTATCTTCCATGAGTCTCAAGACAGCTTTGGAGAGTTTTCTGCAGTCCCTCGCTATCC  
 AGAGGGTGAAGAAGACAGCTGGAAACGTTTTCCATGCTCTAAGAATGAATATCTTTGGTCT  
 AGCTCTTCTCTCCTCATTATGGTTATCTGCTACTCAGGAATCATTAATAACTCTCCTGAG  
 ATGTCCCAATAAAAAAAAAACACAAGGCCATCCGTCTTATTTTTGTTGTTATGATAGTCTT  
 TTTTATTTTTTGGACCCCGTACAACCTGGTTCTCCTTTTTTCTGCTTTTTCACAGCACATT  
 TTTAGAGACCAGCTGTGAGCAGAGTAAACATCTGGACCTGGCCATGCAGGTGACTGAGGT  
 GATTGCCTACACCCACTGCTGTATTAATCCAGTAATCTACGCCTTTGTTGGTGAGAGGTT  
 CCGGAAACACCTTCGGCTCTTTTTCCACAGAAATGTGGCAGTTTACCTGGGAAAATATAT  
 TCCGTTTCTTCTGGTGTGAGAAAATGGAAGAACAAGCTCTGTCTCCCCATCAACTGGGGA  
 GCAAGAAATCTCTGTGGTGTTTTAGTTGGGCAGAGAAAATGTCACTTATTCCATGGACT

GAAAGATGAAGCAAACACATTAAGTCAGTCACAATGACCTCTAGCTCAGTCATTTGTA  
 CTCCATGCAATGCTGATGCTCTCAAAGACCTGTAAACACACATAATAACTGCAGAATATC  
 TTCATCTACCCCAAGATCATTAGTAGAGGACATGTGCTGGCCAGTTGACAATTCATCAA  
 CATGACATGAAAAAGACAGCTTTTTTTTTTTTATTCTCCAAAGAGTTATACATGTTCTGAT  
 TCACTTAAATGTTAAATAATCCATTACACAAGTAGGAAGGTTTAAAAAATATTTAAACTAC  
 TTTTGCCACTTTTTGACATCAGTGAAATGTTTCACAAAATGCATTTATTTTATTTTCTTAA  
 CGTAAGTAGTTCTTTTTCTTCTTGATGAATGGCTTTCTTTTTCTCTTTTTAAAAAATT  
 ATTATTTGAATATAGACTGGATGTTATATCTTGTTTAAATTTTTTTCTTAAAAAGTCAAATGA  
 AATCATATTTCTATTAGTGATTGAGAGCATCTTGGAAGGAACACACTCTCCTCATAATG  
 CCAGTTTTATGTTGAAAAACAGGCTGGGGCCATCTGTATTGAGAAGTCCAGGTGTGGTGC  
 TGTCGTTAATTTCTTAGACTTGACATCATAAGTACCTGGAGGGTATAGTGACACATGC  
 ACAGGTAACCTCTATTACAGGAGAAGAGTAGAAAATTTGAAAACAGACATCAAGATTAACA  
 GATGAAGTAAGACTGGAAACCCCTTTCTACCGGCCCTCACATACCAAATAGAGGATGTAC  
 AAGAAAAGTATATGATATCACACAGAAAAGTTGGCACTATGCAAATAACCCATGAATG  
 ATAAGAATTCATATGATGCAGTGCTTTTGGGTGTTTGTCTTTTTCACAGATCATTAGCCTA  
 CTTCTATCCTCGAGAATATCTTTTTATCTTTCTTAATAAACTGCCTGTGTTTCTATCATT  
 ATCTATATGTTTATTCTGGCACACAGACCCTAGAAATCTCAGGAGGTGCTCTCTGGA  
 TTGAAGTGTGCACTTATAGCACCACCTCAGTGCTTATGACTCATGTTTGAAGTGAGGTCT  
 GAGCATCAACAACACGTTCCAGGTGGTGGACGTGATACTTGTCCCAAGATCACACTTTT  
 AGAATTATGTTGTAAGTGTGATGCGTTTACAGACTCAACAATTGAAAATGAGGATG

|         | Sequence                 | Tm |
|---------|--------------------------|----|
| Forward | CAGAATCAAAGAGCTGGGGTCATG | 63 |
| Reverse | GAGGCCGATGATGAACACCA     | 60 |

CCR4

>NM\_009916 NM\_009916 Mus musculus chemokine (C-C motif) receptor 4 (Ccr4), mRNA. 11/2006

CGCTGCCTGCTGGTACCCGGAGCGGACGGCATTGCTTCATAGACTGTCTCAGGATCAC  
 TTTTCAAAGAGCAAGGCAGCTCAACTGTTCTCATTGGCTTCTCCTGCTGGTACCCGGAGC  
 GCGACGATTCCAAAGATGAATGCCACAGAGGTACAGACACCACCAGGATGAAACTGTG  
 TACAATAGTTATTACTTCTACGAAAGCATGCCAAAGCCTTGCACCAAGGAAGGTATCAAG  
 GCATTTGGGGAGGTCTTCTGCCTCCTCTACTCCTTGGTCTTCTTGTGGGTCTGTTT  
 GGAATTTCTGTTGTGGTTCTGGTCTGTTCAAATAACAAGAGGCTCAAGTCCATGACGGAC  
 GTGTACTGCTGAACCTGGCCATCTCGGATTTGCTGTTGCTGTTGCAAGATCGTTTTCATGG  
 GGCTACTACGCCGCCGACCAGTGGGTTTTTGGACTAGGTCTGTGCAAGATCGTTTTCATGG  
 ATGTACCTGGTGGGCTTCTACAGCGGCATCTTCTTCATCATGCTCATGAGCATAGACAGA  
 TACCTGGCCATCGTGCACGCGGTATTCTCCTTGAAGGCAAGGACCCTGACCTATGGGGTC  
 ATCACCAGCCTGATCACGTGGTCAAGTGGCTGTGTTTGCCTCCCTCCAGGCCTCTTGTTT  
 AGCACTTGCTACACAGAGCACAAACCACACGTAAGTCAAAAACCCAGTACTCGGTCAACTCG  
 ACGACGTGAAAGTCTCAGCTCCCTGGAGATCAACGTCTGGGGCTGCTTATCCCCCTG  
 GGCATCATGCTGTTTTGGTATTCCATGATCATTAGGACTCTGCAACACTGCAAGAATGAG  
 AAGAAGAACAGAGCAGTGCATGATCTTCCGGCGTGGTGGTCTCTTCTCCTCGGCTTCTGG  
 ACGCCGTACAACGTGGTGTCTTTTCTGGAGACGCTGGTGGAGCTTGAAGTCTTTCAGGAC  
 TGCACCTTGGAGAGGTACCTAGACTACGCCATCCAGGCTACAGAAACCCCTGGGCTTCATT  
 CACTGCTGCCTTAAACCCCGTCATTTACTTCTTTCTCGGGGAGAAAATTCGCAAGTACATC  
 ACCCAACTCTTCAAACATGCCGGGGTCCCCTCGTGCTCTGCAAAACTGTGACTTCTCTC  
 CAGGTCTACTCGGCTGACATGTCCAGCTCCTTACACGCAGTCCACTGTGGATCATGAC  
 TTCCGTGACGCTTTGTAAGGTGTGAGTGGGGGTAACATGGCGTTAAACAAGCTCCACACAC  
 CCAGCACCTGCTCGCCTTGTTCAGTCAGGGTGCCTGAAACAGGGCTCTGAGGAAGAAAA  
 CAAGTAAAACCAAGACCATGGCAAGATGGCTTCTCACCCCTGCAGGTGGCTCCCAAGAGGT  
 TCAGAGCCCTGCTGGGTGGAGGAAATCACCCCTTCATGACAATGAGCCCTTGAAGTGGATC  
 TCTAGTTTGGTTGAAGTACCTAGAATTTCTGGACATGCTGTATTCCATAAAGCCAGATGT  
 CTGGAGAAAAAAAAAAAAAAAAAAAAAAAAAAAAA

|         | Sequence                | Tm |
|---------|-------------------------|----|
| Forward | CGACGGCATTGCTTCATAGACTG | 63 |
| Reverse | CAGTTGAGCTGCCTTGCTCTTC  | 60 |

MCSF

>NM\_007778 NM\_007778 Mus musculus colony stimulating factor 1 (macrophage) (Csf1), mRNA. 3/2007

GACAGAGCGACGGGGAAGAGAGCTAGCGGGGACGACCAGGCGGCCCGCTTGGGGGAAGGG  
AGTCGGCGGCTCAGTGGGCTCTGGGGTGTAGTATGTGTCAGTGCCTGTGAGTGTGTTT  
TGTGTGTGTATGTCTGTGTGTGTCTGGCGGAGAGCCAGGGTGATTTCCCATAAAACACAT  
GCCCCGCCAGCCCGCCGCTTAAAAGGCTGTGCCGAGGGCTGGCCAGCGAAGCTCGGCCA  
GGGAAAGTGAAAGTTTGCCTCGGTGCTCTCGGTGTGCTGCGGCTCTCTGCATCCCAGG  
ACAGCGGCGTGGCCCTCGACCGGGGCGCGGGCTCTTCAGCCACTAGCGAGCAAGGGAGCG  
AGCGAACAGGGCGGCCAACACGCCGTGCCGGGACCCAGCTGCCCCGATGACCGCGCGGG  
GCGCCGCGGGGCGCTGCCCTTCTTCGACATGGCTGGGCTCCCCGGCTGCTGCTGGTCTGTC  
TCCCTCATGAGCAGGAGTATTGCCAAGGAGGTGTCAGAACAACACTGTAGCCACATGATTGGGA  
ATGGACACCTGAAGGTCTTCGACAGCTTGATCGACAGTCAAATGGAGACTTCATGCCAGA  
TTGCCTTTGAATTTGTAGACCAGGAACAGCTGGATGATCCTGTTTGTACCTAAAAGAAGG  
CCTTTTTTCTGGTACAAGACATAATAGATGAGACCATGCGCTTTAAAAGACAACACCCCCA  
ATGCTAACGCCACCGAGAGGCTCCAGGAACCTCCAATAACCTGAACAGCTGCTTCACCA  
AGGACTATGAGGAGCAGAACAAGGCCTGTGTCCGAACCTTTCATGAGACTCCTCTCCAGC  
TGCTGGAGAAGATCAAGAACTTCTTTAATGAAACAAAGAATCTCCTTGAAAAGGACTGGA  
ACATTTTTTACCAAGAAGTCAACAACAGCTTTGCTAAGTGTCTTAGCCGAGATGTGGTGA  
CCAAGCCTGATTGCAACTGCCTGTACCCTAAAGCCACCCCTAGCAGTGACCCGGCCTCTG  
CCTCCCCTCACAGCCCCCGCCCCCTCCATGGCCCCCTCTGGCTGGCTTGGCTTGGGATG  
ATTCTCAGAGGACAGAGGGCAGCTCCCTCTTGCCAGTGAGCTTCCCCTTCGCATAGAGG  
ACCCAGGCAGTGCCAAGCAGCGACCCACCCAGGAGTACCTGCCAGACCTCGAGTCAACAG  
AGCAACCAAACCATGGGGACAGACTCACTGAGGACTCAACAACCTCATCCTTCTGCGGGGG  
GGCCCGTCCCTGGGGTGGGAAGACATTCTTGAATCTTCACTGGGCACTAACTGGGTCTTAG  
AAGAAGCTTCTGGAGAGGCTAGTGAGGGATTTTTGACCCAGGAAGCAAAGTTTTCCCCCT  
CCACGCCTGTAGGGGGCAGCATCCAGGCAGAGACTGACAGACCCAGGGCCCTCTCAGCAT  
CTCCATTCCCTAAATCAACAGAGGACCAAAAGCCAGTGGATATAACAGACAGGCCGTTGA  
CAGAGGTGACCCCTATGAGACCCATTGGCCAGACACAGAATAATACTCTGAGAAGACTG  
ATGGTACATCCACGCTGCGTGAAGACCACAGGAGCCAGGCTCTCCCCATATTGCGACAC  
CGAATCCCCAACGAGTCAGCAACTCAGCCACCCCGTTGCTCAGTTACTGCTTCCCCAAAA  
GCCACTCTTGGGGCATTGTGCTGCCCCCTTGGGGAGCTTGAGGGCAAGAGAAGTACCAGGG  
ATCGAAGGAGCCCCGAGAGCTGGAAGGAGGATCAGCAAGTGAGGGGGCAGCCAGGCCTG  
TGGCCCGTTTTTAATTCCATTCTTTGACTGACACAGGCCATGTGGAGCAGCATGAGGGAT  
CCTCTGACCCCCAGATCCCTGAGTCTGTCTTCCACCTGCTGGTGCCGGGCATCATCCTAG  
TCTTGCTGACTGTTGGGGCCTCCTGTTCTACAAGTGAAGTGGAGGAGCCATCGAAACC  
CTCAGACATTGGATTCTTCTGTGGGGCGACCAGAGGACAGCTCCCTGACCCAGGATGAGG  
ACAGACAGGTGGAAGTCCAGTATAGAAAGGATTCTATGCTGGGCACACAGGACTATCTC  
TTTATGGAAGGAGACATATGGGAACATCCACCACTACCCCTCTCCTACCATCTTCTGGGA  
ATGTGGCCTACCACTACCAGAGCTCCTGCCTACCAAGACTGGATGAAAAGAAGCAGCTTTG  
ATGGGGTCTTTCCATCCTCACCCCTTAGACTCTCAACCAAAGAGAAAAGGGCTGGAGGATGC  
CCCCACATACTGCCACTATTTATTGTGGGCCCTGGAGGCTCCCTGCATTGGAGGAAGGG  
CAGCTCAGCAGCTCAGGACCCTTTCCCTTAGGGGCTGCTTCTCCCTCAAACCCAGAAC  
CTGGCAAGGGACTCACTAGCCTGGATGGCCATGGGAGACCAGGTGAGATGAGAAGGAGC  
AGAAGAGCCCTGTGCCAGAAGACCAACTGGTGCCAAGGAATCCCAGCATGGACAGGCA  
GGGACCTGTTTCCCAAGAAGAGAGCCTGATATTCAAAGGGTGGGACAGCATCTGCCCGAC  
TTCCCCTAAAGGCATAAAGGCACGCAGCCCCAAAAGACGGGAAGAGGAGGCCCTTTGGCTGC  
TTGTGTTGACAGCTTAAAGGGGTCTACACCCCTCAACTTGCTTAAAGTGCCCTCTGCTGATA  
GCCAGGAAGGAGGGGAGACCAGCCCTGCCCCCTCAGGACCTGACCTGGCTCATGATGCCAAG  
AGGAAGACAGAGCTCTAGCCTCGTCTTCTCCTGCCACAGCCCTGCCAGAGTTCTTTTTG  
CCCAGCAGAGGCACCCCTCATGAAGGAAGCCATTGCACTGTGAATACTGAACCTGCCTGC  
TGAACAGCCTGTCCCATCCATCCCTATGAGTGACCATCCGTCCGAATGTTCTCCCACTTC  
CTTCAGCCTCTCCTCGGCTTCTTGCCTGAGCTGGCCTCACGTGTTGACTGAGGGAGCCC  
CTGAGCCCCAACCTTCCCCTGCCTCAGCCTTTGATTGTCCAGGGTGAAGCTGTGGGAGAA  
CCGCCTGGGCTACCAGTCAGAGCTGGTCTTTGGGCTGTGTTCTTGGCCAGGTTTCTGCA  
TCTTGCCTTTGACATTTCCAGGAGGGAAGTGACTAGTGAAGGGGAGAGAGGAAGGGGAG  
GCAGAGACAAAGGCCACAGGCAGAGCTATGAATGAGAATGGGTCTTGAAAATATGTGTGC  
ACCCCTAAGCTTGAAATTGATCTCTATACTCTAGCCCCCTCAGCCAGCCTCCTTCTGTTG



TCTGAAACCTGGAGCTAAGCAGGTTGTCTGTGTCACAAGCTCTGGGGACTGAGCTCCATGC  
TCCAACCCACCCCTCTTCTGACCTTTGTCTCCAGACCTGACCCAGGTAGGCAAGGGTAC  
CCTCCCAGTCTCACCTACCATACTGTGCCATCTCTAGCCAAGCAAGCCAGGTTTAGAGAA  
GGGTCAAAAAAAAAAAAAAAAAAAGGGTTGTTTACTTCCAACCTTGTCTGATGCCCTCTGT  
TTCCAGGCCAGGCTTGTCTGTGGTGACCTGGGCATGGGTGACAGGGCTCTCATTTGCCC  
CTTGGTCTCTTTATGCTGCTGAGTCCCCCTTTCTGCCCTCCCTGGCTACTGGGTCAATA  
ATCTTTTCAAGCCATGAATCTGGGAGGAGAGTGGTCTGTAAGCTCCATCAGCCCTGTCTGT  
AGACAGCAGGGGGGAAGGACACTGGAGACTTTTCTTGTGGGGCTTACTTAGCCTTCTGGTT  
ACAGACTATTTCCATGCTAGAAAATACATATTTTAAAATAGAAGGAAAAACACAGAAACA  
AAACAAAACAAGGCATTCTCTACCCCTCCACCTTAAACATATATTATTAAGACAGAAGA  
GAAAATCCAACCCATTGCAAGAAGCTCTTTGTGGGTGCCTGGTTACATCGGAGCAGGGGA  
GCCTCAAATCCACCTTTGGAGCCGCCCTGTGTGCATTAGGAACCCCTTCTCTCCTCTGAG  
AAAGCTCAGAGGGGACTGCCTCACAAACTGTGAGACTGCGTTTTTTATACTTGGAAAGT  
GGTGAATTATTTTATATAAGGTCATTTAAATATCTATTTAAAAAATAGGAAGCTGCTTTT  
ATATTTAATAATAAAAAGAAGTGCACAAGC

|         | Sequence               | Tm |
|---------|------------------------|----|
| Forward | AGCCTGATATTCAAAGGGTGGG | 60 |
| Reverse | CCGTCTTTTGGGCTGCGTG    | 63 |

**GCSF**

>NM\_009971 NM\_009971 Mus musculus colony stimulating factor 3 (granulocyte) (Csf3), mRNA. 11/2006

GTATAAAGGCCCCCTGGAGCTGGGCCCTGGCAGAGCCCAGAGCTGCAGCCCAGATCACCC  
AGAATCCATGGCTCAACTTTCTGCCCAGAGGCGCATGAAGCTAATGGCCCTGCAGCTGCT  
GCTGTGGCAAAGTGCACCTATGGTCAGGACGAGAGGCCGTTCCCTGGTCACTGTCAGCGC  
TCTGCCACCATCCCTGCCTCTGCCCCGAAGCTTCTGCTTAAGTCCCTGGAGCAAGTGAG  
GAAGATCCAGGCCAGCGGCTCGGTGCTGCTGGAGCAGTTGTGTGCCACCTACAAGCTGTG  
TCACCCCGAGGAGCTGGTGTGCTGGGCCACTCTCTGGGGATCCCGAAGGCTTCCCTGAG  
TGGCTGCTCTAGCCAGGCCCTGCAGCAGACACAGTGCCTAAGCCAGCTCCACAGTGGGCT  
CTGCCTCTACCAAGGTCTCTGCAGGCTCTATCGGGTATTTCCCTGCCCTGGCCCCCAC  
CTTGGACTTGCTTCACTGGATGTTGCCAACTTTGCCACCACCATCTGGCAGCAGATGGA  
AAACCTAGGGGTGGCCCTACTGTGCAGCCCACACAGAGCGCCATGCCAGCCTTCACTTC  
TGCCTTCCAGCGCCGGGCAGGAGGTGTCCTGGCCATTTTCGTACCTGCAGGGCTTCTGGA  
GACGGCTCGCCTTCTCTGCACCACTTGGCCTAGACCTGAGCAGAAAGCCCTTTCCAGAT  
AGTTTATTTATCTCTATTTAATATTTATGCATATTTAAGCCTACTATTTAAAGACAAAGA  
CGAGAAAATGGAGCTCTAAGCTTCTAGATCATTCTCTCCACTTCCGAGTTTTGTTCTCCT  
GCTTAGAGCAGAGAGAGAAGGCTCTTGTGTCTCCTGTGGAGGCCAGGGAAGGAGATGGG  
TAAATACCAAGTATTGATTCTGCTGCTGCTCCAGGCACCCAGTTCTGTGGCAGTACCCC  
CAAAAAATCAGTGAGCCCTGCCGTGCTGAGGCACCATCTCAGGGGGGCCAGGCAGCATC  
TGGTCTCCCTTCCGGGGGACAAGACATCCCTGTTTAAATATTTAAACAGCAGTGTTCCAA  
ACTGGGTTCTTATATCCCTTGTCTGGTCAACCAGGTTGCAGGGTTTCTGTCTCACAG  
GAACGAAGTCCCTAAAGAAAACAGTGGCAGCCAGGTTTAGCCCCGGAATTGACTGGATTCC  
TTTTTTAGGGCCCTGCTGGCCTGGAAGTTGGAGTGGGGGGCAGAGGAGGCAGGAGGAAGC  
CTGGGGGGGGGGTTGGCATGGAGGGAGGCCTTCCCATCCACCTCACCTCCACCCACC  
TGTCATATAGCCAAGCTTGGCGATAATAAAGTGTGGTGTTC

|         | Sequence            | Tm |
|---------|---------------------|----|
| Forward | GCCAACTTTGCCACCACCA | 61 |
| Reverse | CTGCACAGTAGGGGCCACC | 60 |

**GMCSF**

>NM\_009969 NM\_009969 Mus musculus colony stimulating factor 2 (granulocyte-macrophage) (Csf2), mRNA. 2/2007

GGTCAGACTGCCAGGCAGGGTGGGAAAGGCCTTTAAAGCAGCCCGCAGGTGGGCTGCCA  
GTTCTTGAAGGGCTTATTAATGAAAACCCCCAAGCCTGACAACCTGGGGGAAGGCTCA  
CTGGCCCCATGTATAGCTGATAAGGGCCAGGAGATCCACAACCTCAGGTAGTTCCCCCGC  
CCCCCTGGAGTTCTGTGGTCACCATTAATCATTTTCTCTAACTGTGTATATAAGAGCTCT  
TTTGCAGTGAGCCCAGTACTCAGAGAGAAAAGGCTAAGGTCTGAGGAGGATGTGGCTGCA

GAATTTACTTTTTCTGGGCATTGTGGTCTACAGCCTCTCAGCACCCACCCGCTCACCCAT  
 CACTGTCAACCCGGCCTTGGGAAGCATGTAGAGGCCATCAAAGAAGCCCTGAACCTCCTGGA  
 TGACATGCCTGTACGTTGAATGAAGAGGTAGAAGTCGTCTCTAACGAGTTCTCCTTCAA  
 GAAGCTAACATGTGTGCAGACCCGCTGAAGATATTCGAGCAGGGTCTACGGGGCAATTT  
 CACCAAACCTCAAGGGCGCCTTGAACATGACAGCCAGCTACTACCAGACATACTGCCCCCC  
 AACTCCGGAAACGGACTGTGAAACACAAGTTACCACCTATGCGGATTTTCATAGACAGCCT  
 TAAAACCTTTCTGACTGATATCCCCTTTGAATGCAAAAAACCAGGCCAAAAATGAGGAAG  
 CCCAGGCCAGCTCTGAATCCAGCTTCTCAGACTGCTGCTTTTTGTGCCTGCGTAATGAGCC  
 AGGAACCTTGAATTTCTGCCTTAAAGGGACCAAGAGATGTGGCACAGCCACAGTTGGAAG  
 GAAGTATAGCCCTCTGAAAACGCTGACTCAGCTTGGACAGCGGAAGACAAACGAGAGATA  
 TTTTCTACTGATAGGGACCATTATAATTATTTATATATTTATATTTTTTTAAATATTTAT  
 TTATTTATTTATTTATTTTGTCAACTCTATTTATTGAGAATGTCTTACCAGAATAATAAA  
 TTATTTAAAACCTTTT

|         | Sequence               | Tm |
|---------|------------------------|----|
| Forward | CACCCACCCGCTCACCC      | 62 |
| Reverse | TTGATGGCCTCTACATGCTTCC | 60 |

**IL12 alpha**

>NM\_008351 NM\_008351 Mus musculus interleukin 12a (Il12a), mRNA. 2/2007

TGCCACCTACTCCCTTGGATCTGAGCTGGACCCTTGCATCTGGCGTCTACACTGCTGCTG  
 AAATCTTCTCACCGTGCACATCCAAGGATATCTCTATGGTCAGCGTTCCAACAGCCTCAC  
 CCTCGGCATCCAGCAGCTCCTCTCAGTGCCGGTCCAGCATGTGTCAATCACGCTACCTCC  
 TCTTTTTGGCCACCCTTGCCTCCTAAACCACCTCAGTTTGGCCAGGGTCATTCCAGTCT  
 CTGGACCTGCCAGGTGTCTTAGCCAGTCCCAGAACCTGCTGAAGACCACAGATGACATGG  
 TGAAGACGGCCAGAGAAAACTGAAACATTATTCCTGCACTGCTGAAGACATCGATCATG  
 AAGACATCACACGGGACCAAACCAGCACATTGAAGACCTGTTTACCCTGGAACACACA  
 AGAACGAGAGTTGCCTGGCTACTAGAGAGACTTCTTCCACAACAAGAGGGAGCTGCCTGC  
 CCCACAGAAGACGTCTTTGATGATGACCCTGTGCCTTGGTAGCATCTATGAGGACTTGA  
 AGATGTACCAGACAGAGTTCCAGGCCATCAACGCAGCACTTCCAGAATCACAACCATCAGC  
 AGATCATTCTAGACAAGGGCATGCTGGTGGCCATCGATGAGCTGATGCAGTCTCTGAATC  
 ATAATGGCGAGACTCTGCGCCAGAAACCTCCTGTGGGAGAAGCAGACCCCTTACAGAGTGA  
 AAATGAAGCTCTGCATCCTGCTTACGCCTTCCAGCACCCGCGTCTGACCATCAACAGGG  
 TGATGGGCTATCTGAGCTCCGCCTGAAAGGCTCAAGGCCCTCTGCCACAGCGCCCTCCTC  
 ACACAGATAGGAAACAAAGAAAGATTTCATAAGAGTCAGGTGGTCTTGGCCTGGTGGCCCT  
 TAAGCTCCTTCCAGGAATCTGTTCTCCCATCACATCTCATCTCCCCAAAGGTGGCACAGCT  
 ACCTCAGCATGGTCCCCTCCATCGCTTCTCTCATATTCACTATACAAGTTGTTTGTAAAGT  
 TTTTCATCAAAAATATTGTTAAGGGGCGAAGACGTCCTCCCCTCAATGTGTTAGCAGAAGAG  
 CAAGAACTGATAAGCTATTGTTTTTGTGCCAAAGTGTTTATGAAAACACTCAGTCACCCC  
 TTATTTAAAAATATTTATTGCTATATTTTATACTCATGAAAGTACATGAGCCTATTTATA  
 TTTATTTATTTTCTATTTTATTATAATATTTCTTATCAGATGAATTTGAAACATTTTAAAA  
 CATACTTATTTTGTGGTTCT

|         | Sequence               | Tm |
|---------|------------------------|----|
| Forward | CCCATCACATCTCATCTCCCCA | 63 |
| Reverse | AAGCGATGGAGGGGACCAT    | 60 |

**IL12 beta**

>NM\_008352 NM\_008352 Mus musculus interleukin 12b (Il12b), mRNA. 3/2007

AGAAGGAACAGTGGGTGTCCAGGCACATCAGACCAGGCAGCTCGCAGCAAAGCAAGGTAA  
 GTTCTCTCCTCTTCCCTGTGCTAACTCCCTGCATCTAGAGGCTGTCCAGATTCCAGACTC  
 CAGGGGACAGGCTACCCCTGAACCAGGCAGCGTGGGAGTGGGATGTGTCCTCAGAAGCTA  
 ACCATCTCCTGGTTTTGCCATCGTTTTGTGTTGTTCTCCACTCATGGCCATGTGGGAGCTG  
 GAGAAAGACGTTTATGTTGTAGAGGTGGACTGGACTCCCGATGCCCTGGAGAAACAGTG  
 AACCTCACCTGTGACACGCCTGAAGAAGATGACATCACCTGGACCTCAGACCAGAGACAT  
 GGAGTCATAGGCTCTGAAAGACCCTGACCATCACTGTCAAAGAGTTTCTAGATGCTGGC  
 CAGTACACCTGCCACAAAGGAGGCGAGACTCTGAGCCACTCACATCTGCTGCTCCACAAG  
 AAGGAAAATGGAATTTGGTCCACTGAAATTTAAAAAATTTCAAAAAACAAGACTTTCTCTG

AAGTGTGAAGCACCAAATTA CTCCGGACGGTTACG TGCTCATGGCTGGTGCAAAGAAAC  
 ATGGACTTGAAGTTCAACATCAAGAGCAGTAGCAGTTCCCTGACTCTCGGGCAGTGACA  
 TGTGGAATGGCGTCTCTGTCTGCAGAGAAGGTCACACTGGACCAAAGGGACTATGAGAAG  
 TATTCAGTGTCTCCAGGAGGATGTCACCTGCCCAACTGCCGAGGAGACCCTGCCATT  
 GAACTGGCGTTTGAAGCACGGCAGCAGAATAAATATGAGAACTACAGCACCAGCTTCTTC  
 ATCAGGGACATCATCAAACCAGACCCGCCCAAGAACTTGCAGATGAAGCCTTTGAAGAAC  
 TCACAGGTGGAGGTGAGTGGGAGTACCCTGACTCCTGGAGCACTCCCCATTCTACTTC  
 TCCCTCAAGTTCTTTGTTTGAATCCAGCGCAAGAAAGAAAAGATGAAGGAGACAGAGGAG  
 GGGTGTAAACCAGAAAGGTGCGTTTCTCGTAGAGAAGACATCTACCGAAGTCCAATGCAAA  
 GCGGGAATGTCTGCGTGCAAGCTCAGGATCGCTATTACAATTCCTCGTGAGCAAGTGG  
 GCATGTGTTCCCTGCAGGGTCCGATCCTAGGATGCAACGTTGGAAAGGAAAAGAAAGTGG  
 AAGACATTAAGGAAGAAAATTTAAACTCAGGATGGAAGAGTCCCCAAAAGCTGTCTTC  
 TGCTTGGTTGGCTTTTTCCAGTTTTCTAAGTTCATCATGACACCTTTGCTGATTTCTAC  
 ATGTAAATGTTAAATGCCCGCAGAGCCAGGGAGCTAATGTATGCATAGATATTCTAGCAT  
 TCCACTTGGCCTTATGCTGTTGAAATATTTAAGTAATTTATGTATTTATTAATTTATTTTC  
 TGCATTTACATTTGTATAACCAAGATGTATTGAATATTTTCATGTGCTTGTGGCCTGATCC  
 ACTGGGACCAGGCCCTATTATGCAAATTTGTGAGCTTGTATCTTCTTCAACAGCTCTTCA  
 ATCAGGGCTTCGTAGGTACATTAGCTTTTGTGACAACCAATAAGAACATAATATTCTGAC  
 ACAAGCAGTGTACATATTTGTGACCAGTAAAGACATAGGTGGTATTTGGAGACATGAAG  
 AAGCTGTAAAGTTGACTCTGAAGAGTTTAGCACTAGTTTCAACACCAAGAAAGACTTTTTT  
 AGAAGTGATATTGATAAGAAACCAGGGCCTTCTTTAGAAGGGTACCTAAATTTAAAAGAA  
 TTTTGAAAGGCTGGGTATCGGTGGTATATGCTTTAATTCCAGCACTCAGGAGACCAAGG  
 CAGGCAGATCTCTGTGAGTTTGGAGACAGCCTGGTGTACAGAGGGAGTTCCAGCACAGCC  
 AGTGCCACACAGAAATTCGTCTCAAAAACA

|         | Sequence              | Tm |
|---------|-----------------------|----|
| Forward | TCCAGATTCAGACTCCAGGGG | 60 |
| Reverse | GACACATCCCACCTCCACGC  | 62 |

IL1 alpha

>NM\_010554 NM\_010554 Mus musculus interleukin 1 alpha (Il1a), mRNA. 2/2007

AAGTCTCCAGGGCAGAGAGGGAGTCAACTCATTGGCGCTTGAGTCGGCAAAGAAATCAAG  
 ATGGCCAAAGTTCCTGACTTGTGTTGAAGACCTAAAGAAGTGTACAGTGAAAACGAAGAC  
 TACAGTTCTGCCATTGACCATCTCTCTGAAATCAGAAATCCTTCTATGATGCAAGTAT  
 GGCTCACTTCATGAGACTTGCACAGATCAGTTTGTATCTCTGAGAACCTCTGAAACGTCA  
 AAGATGTCCAACCTTCACTTCAAGGAGAGCCGGGTGACAGTATCAGCAACGTCAAGCAAC  
 GGAAGATTCTGAAGAAGAGACGGCTGAGTTTTCAGTGAGACCTTCACTGAAGATGACCTG  
 CAGTCCATAACCCATGATCTGGAAGAGACCATCCAACCCAGATCAGCACCTTACACCTAC  
 CAGAGTGATTTGAGATACAAAGTGAAGCTCGTCAGGCAGAAGTTTGTGATGAATGAT  
 TCCCTCAACCAAATATATATCAGGATGTGGACAAACACTATCTCAGCACCCTTGGTTA  
 AATGACCTGCAACAGGAAGTAAAATTTGACATGTATGCCTACTCGTCGGGAGGAGACGAC  
 TCTAAATATCCTGTTACTCTAAAATCTCAGATTCACAACTGTTCTGTGAGCGCTCAAGGA  
 GAAGACCAGCCCGTGTGCTGAAGGAGTTGCCAGAAACACCAAAACTCATCACAGGTAGT  
 GAGACCGACCTCATTTTCTTCTGGAAAAGTATCAACTCTAAGAAGTACTTACATCAGCT  
 GCTTATCCAGAGCTGTTTATTGCCACCAAAGAACAAGTCCGGGTGCACCTGGCACGGGGA  
 CTGCCCTCTATGACAGACTTCCAGATATCATAAAAAGCAGCCTTATTTCCGGGAGTCTATTC  
 ACTTGGGAAGTGCTGACAGTCTGTATGTACCATGTACAGGAACCTTCTCACCTGAGTC  
 ACTTGCACAGCATGTGCTGAGTCTCTGTAATTTCTAAATGAATGTTTACCCTCTTTGTAAG  
 AGAAGAGCAAACCTAGTGGAGCCACCCGACATATGATACTATCTGTTATTTTAAAGAG  
 TACCCTATAGTTTGTCTCAGTACTAATCATTTTAATTACTATTCTGCATGGCATTCTTAGG  
 AGGATCAAAAAGACTCTACACATATTACAGATGGGTTAACAAGGGATAAAAACAAGTAA  
 AAGCACACTCAAGTCAATTTGGAATATAAATTCACAGACCAATCTCACTGTGCACCTTCGG  
 CTTCAAAAATGCCAGTTGAGTAGGATAAAGGTATAAAGAACTTAATGCTGTCAATTTCAAAA  
 GGAAGGGGACAATAGCTACATCTTTTCTACCTCAGTGGGTTTTACTCCAGTGAGATCATT  
 TGGATGAAATCCTCCTGTAACAGACCTCAAGAAGGAGACAGACTGTTGAATGTTATTTTTT  
 AAGTTATTTTATCTATGTATTTATAAATATATTTATGATAATTATATTATTTATGGAACA  
 TCCTTAAATCCTCTGAGCTTGGACGGCACCCTCGCAGCAGGGTTTTCTAGGTGGTCAGTTA  
 GATGTAGTCTCCTCTAGAGCTCCATGCTACAGACTTTTACACTTTTTCCACAGCCACGAA  
 GCTCTCCGTACATTCCTGCACCTTGGGAGCCCTTTCATCATGATCTTAATCTGTGCTGTTT

ACTTTTGTGCATCTAAAATGATAATTGAGTCAGTCTTTTCTCCCTCCCGTCCTTAAAGCTGT  
 CTGGGTATTCTTACATCATTAGTCTCACCTGTAACCAACCAACCATCTAAAGATGGA  
 AAGAGCTTAACTGTGACAACCACATCACTGATACCTGAAGTTTCTTTTCTAGAATGTAAT  
 CAGTGTTCCTCCCTGGATTCCAATTTTTTTTTTCAAACCACAGTGTGTAACATCAACA  
 ATAACAATCAACTCATTATTATTAATCATAATTAATAAAAACAGGTTTGAGCTG

|         | Sequence                 | Tm |
|---------|--------------------------|----|
| Forward | GCACGGGGACTGCCCTCTAT     | 62 |
| Reverse | TAGACTCCCGAAATAAGGCTGCTT | 60 |

IL1 beta

>NM\_008361 NM\_008361 Mus musculus interleukin 1 beta (Il1b), mRNA. 2/2007  
 CGAGGCCTAATAGGCTCATCTGGGATCCTCTCCAGCCAAGCTTCTTGTGCAAGTGTCTG  
 AAGCAGCTATGGCAACTGTTCTGAACTCAACTGTGAAATGCCACCTTTTGGACAGTGATG  
 AGAATGACCTGTTCTTTGAAGTTGACGGACCCCAAAAGATGAAGGGCTGCTTCCAAACCT  
 TTGACCTGGGCTGCCTGATGAGAGCATCCAGCTTCAAATCTCGCAGCAGCACATCAACA  
 AGAGCTTCAGGCAGCAGTATCACTCATTGTGGCTGTGGAGAAGCTGTGGCAGCTACCTG  
 TGTCTTTCCCGTGGACCTTCCAGGATGAGGACATGAGCACCTTCTTTTCTTTCATCTTTG  
 AAGAAGAGCCCATCCTCTGTGACTCATGGGATGATGATGATAACCTGCTGGTGTGTGACG  
 TTCCCATAGACAACCTGCACTACAGGCTCCGAGATGAACAACAAAAAGCCTCGTGCTGT  
 CGGACCCATATGAGCTGAAAGCTCTCCACCTCAATGGACAGAATATCAACCAACAAGTGA  
 TATTCTCCATGAGCTTTGTACAAGGAGAACCAAGCAACGACAAAATACCTGTGGCCTTGG  
 GCCTCAAAGGAAAGAATCTATACCTGTCTGTGTAATGAAAGACGGCACACCCACCCTGC  
 AGCTGGAGAGTGTGGATCCCAAGCAATACCCAAAGAAGAAGATGGAAAAACGGTTTGTCT  
 TCAACAAGATAGAAGTCAAGAGCAAAGTGGAGTTTGAGTCTGCAGAGTTCCCAACTGGT  
 ACATCAGCACCTCACAAGCAGAGCACAAGCCTGTCTTCTGGGAAACAACAGTGGTCAGG  
 ACATAATTGACTTCACCATGGAATCCGTGTCTTCTTAAAGTATGGGCTGGACTGTTTCTA  
 ATGCCTTCCCCAGGGCATGTTAAGGAGCTCCCTTTTTCGTGAATGAGCAGACAGCTCAATC  
 TCCAGGGGACTCCTTAGTCTCGGCCAAGACAGGTGCTCAGGGTCACAAGAAACCATGG  
 CACATTCTGTTCAAAGAGAGCCTGTGTTTTCTCCTTGCTCTGATGGGCAACCACTTAC  
 CTATTTATTTATGTATTTATTGATTGGTTGATCTATTTAAGTTGATTCAAGGGGACATTA  
 GGCAGACTCTCTAGAACAGAACCTAGCTGTCAACGTGTGGGGGATGAATTGGTCATAGC  
 CCGCACTGAGGTCTTTTATTGAAGCTGAGAATAAATAGGTTTCTATAATATGGATGAGAC  
 TTTTTATGAATGAAGCACCAGCACATTGCTTTGATGAGTATGAAATAAATTTCAATAAAA  
 CAAACAAA

|         | Sequence                  | Tm |
|---------|---------------------------|----|
| Forward | CTCGTGCTGTCTGGACCCATA     | 61 |
| Reverse | TTGGTTGATATTCTGTCCATTGAGG | 60 |

IL1f9

>NM\_153511 NM\_153511 Mus musculus interleukin 1 family, member 9 (Il1f9),  
 mRNA. 11/2006  
 TGCACCAGAACAAGATCACGATGGAAAAACAATGAAAAAAAAAACATTGTGTATGGAAGTG  
 ATGTTGAGATGGAACACGAGAGAGCTGGGCTATTTGTATCTTCAGCTATGTTTTCTAAAC  
 ACCCATTTTCTACACACATCTCAGGAAGAGAACTCCTGACTTTGGGGAGGTTTTTGACT  
 TGGACCAGCAGGTGTGGATCTTTTCGTAATCAGGCCCTTGTGACAGTTCCACGAAGCCACA  
 GAGTAACCCAGTCAGCGTGACTATCCTCCCATGCAAGTACCCAGAGTCTCTTGAACAGG  
 ACAAAGGGATTGCCATTTATTTGGGAATTCAGAATCCAGATAAATGCCTGTTTTGTAAGG  
 AAGTTAATGGACACCCTACTTTGCTGCTAAAGGAAGAGAAGATTTTGGATTTGTACCACC  
 ACCCTGAGCCAATGAAGCCATTCTGTTTTACCACACCCGGACAGGTGGAACATCCACCT  
 TTGAATCAGTGGCTTTCCCTGGCCACTATATTGCCTCCTCCAAGACTGGCAACCCCATCT  
 TCCTCACATCAAAAAAGGGAGAATATTACAACATTAACCTCAATTTAGATATAAAGTCTT  
 AACTCAGCATGGAAGTGGAGGGTTGGTTAGAACTCTT

|         | Sequence             | Tm |
|---------|----------------------|----|
| Forward | TGGGGAGGTTTTGACTTGGA | 60 |
| Reverse | GGAAGTGTACAAGGGCCTGA | 61 |

IL1rn

>NM\_031167 NM\_031167 Mus musculus interleukin 1 receptor antagonist (Il1rn), transcript variant 1, mRNA. 12/2006

GAGTTCCACCCTGGGAAGGTCTGTGCCATAGACACTGCCTGGGTGCTCCTTTATACACAG  
 CAAGTCTCTCTGGAGTGAGACGTTGGAAGGCAGTGGAAAGACCTTGTGTCTCTGTTTAGCTC  
 ACCCATGGCTTCAGAGGCAGCCTGCCGCCCTTCTGGGAAAAGACCCTGCAAGATGCAAGC  
 CTTTCCAGAACTCTGGGATACTAACCAGAAGACCTTTTACCTGAGAAAACAACCAGCTCATTGC  
 TGGGTACTTACAAGGACCAAATATCAAACCTAGAAGAAAAGATAGACATGGTGCCTATTGA  
 CCTTCATAGTGTGTTCTTGGGCATCCACGGGGCAAGCTGTGCCTGTCTTGTGCCAAGTC  
 TGGAGATGATATCAAGCTCCAGCTGGAGGAAGTTAACATCACTGATCTGAGCAAGAACAA  
 AGAAGAAGACAAGCGCTTTACCTTCATCCGCTCTGAGAAAAGGCCCCACCACCAGCTTTGA  
 GTCAGCTGCCTGTCCAGGATGGTTTCTCTGCACAACACTAGAGGCTGACCGTCTGTGAG  
 CCTCACCAACACACCGGAAGAGCCCTTATAGTCACGAAGTTCTACTTCCAGGAAGACCA  
 ATAGTACTGCCGAGGCCTGTAATAATCACCAACTGCCTGATCACTCTGGCCATCATTGGG  
 GCCTGAGGAACAACCTTTTGCAGGGTGTATGTACAGTAGAAGGAGACAGAAGAGTTCTGAT  
 GATAGATCTCTGCCTCAGTCTGTTGGCTGGCCTAATCCCCATGATGATTCCAGAATAATC  
 TTGCAAATTTGGATCATGGCAGGTGCTTGTTCAAAGCCCTTTCTTGTTCCTCTGCCATCT  
 GGGTGAAGTCTAGACCCTTGTCTGGCCTAGGTGTCTTCTGCTCTACCACCACCCTACC  
 CCTGCCACAACACACACTTTTTTTGTTTTTGTTTTTTCCATTGTTCTGCACTTCCACAG  
 TCCAGACCAATCAAGTCACTTGACAATATGCCCAAGTGAAGTCCCTTACCCTGTTTTATA  
 AACCTGTGCCTGTCTATGGAGAAGGTTTTAATTCTCCTTGTATTATCATTGTTGGGCTTTTT  
 GATGAAACCACCAGGGCATCACATATACTAGGCATGTGCTCTACCATCATGCTATGCTTC  
 CAGCTCAGGGGGCACTTTTAAGGATCTAGAAAAACAGAAATTAAGGATCTCATAGTTATT  
 TTATTAGGCCAGCCTTATTCCATGTGGCAAGAGGTTTCTTGTGGAAATTATGTCCTTTC  
 TGAGAGGAGCTGGGGATTAGATGCTCCTGCATTTGTGAAATGGTTATAAGCATAGAAAAA  
 TAGGTGGTAAGCTTTCCTTCTTTCCTTATTTTTGTGTGATGCCTTAAGCTGAAAAGTTAAA  
 AATTGATGGATTGTAGCATTCCCATATAATCTCCCCCTTCTTTTTTTTTTCTTTGGAAATGT  
 CCAATAGTCTATATTCCTCTGTCCCAGCAACACCATCTTCACTCCAAGCCTACCACAG  
 ATGCTGAAGAAGTTCTCACTATCTGCAAAATGTGGCTCTCAGGCCCTTCTGATGTGAT  
 GAATGAATCTACTAATCTTCTTGTGACCAATCATTTTATCACTTCTAACCTTGAAACATG  
 TGGAAAGTAGCTATGTTCTGACTGTTTCTCTGCCAGACAATGAACTCTGGAGATCAGGG  
 AGCTTCGTGTGTGTGTGTGTGTGTGTGTGTGTGTGTGTGTGTGTGTGTGTGTGTGTGTGTGCGTGC  
 GCGCGC  
 GCGTGCACGCACGTGCATGCACATGCTATGTATTGGGTCCCTCCAAGGATGAACCTC  
 TCTTTGGCTTAGAAGGCCTCAGAGAATATGTGTTATTTCGTGCTCACGGAAAGTTTCTTA  
 CTCATCCCTGTGACTTTGGCTTTATTTTTACAATAAAACACTGAAAATGTCCACTTTGTTA  
 GTTGTGAACATGAGCCAGGCCTAAGGTGCTGGGAAACAGAAAGGGGCGGGAGATTTTTTC  
 TTTATTCTATGGCTAGAAAATAGTTACCTCCTCTCTGAAAGTCTTCTTCTCATTCTGG  
 GTAACAGAATATCAAACACCTTGTCTTATAAGTTATAAAGTAGTGTGTCCACCATGAACC  
 CACCAAGTAAAAACAACCCAAATACCTATCATGGATGAATAATCATGCAAGTATCAGATC  
 TGCACCTCAATGCCACACAATGACAAAAGATAGCAAATGAGCCACAGACGGCTCCACCCAAC  
 CCAATAGATGAACACTTGGTTCAAAAATCACTAAAAGCTCAAATACTCCCAGGTCAAACACC  
 AGGTAACAAGTTAATACTCAACAAAAGGGGAAAAAATAATGTTCCACTGAATCCTGTGACC  
 CTGTGGGCGTGGTTACCTCCTGTGTTGTTTGGCCATGTGTGCTCAGGATGAGCTGATTAA  
 AGCTCTTCTCAGGGGTTTCACTTTTCCATCTCTGCTTGTAAATAAAAAGCTTATGC

|         | Sequence                | Tm |
|---------|-------------------------|----|
| Forward | TCACTCCAAGCCTACCACAGATG | 60 |
| Reverse | AGGGCCTGAGAGCCACATTTG   | 62 |

IL2

>NM\_008366 NM\_008366 Mus musculus interleukin 2 (Il2), mRNA. 1/2007

ATCACCCCTTGCTAATCACTCCTCACAGTGACCTCAAGTCCCTGCAGGCATGTACAGCATGC  
 AGCTCGCATCCTGTGTACATTTGACACTTGTGCTCCTTGTCAACAGCGCACCCACTTCAA  
 GCTCCACTTCAAGCTCTACAGCGGAAGCACAGCAGCAGCAGCAGCAGCAGCAGCAGCAGC  
 AGCAGCACCTGGAGCAGCTGTTGATGGACCTACAGGAGCTCCTGAGCAGGATGGAGAATT  
 ACAGGAACCTGAAACTCCCCAGGATGCTCACCTTCAAATTTTACTTGCCCAAGCAGGCCA  
 CAGAATTGAAAGATCTTCAAGTGCCTAGAAGATGAACTTGGACCTCTGCGGCATGTTCTGG  
 ATTTGACTCAAAGCAAAAGCTTTCAATTGGAAGATGCTGAGAATTTTATCAGCAATATCA  
 GAGTAACTGTTGTAAAACCTAAAGGGCTCTGACAACACATTTGAGTGCCAATTCGATGATG

AGTCAGCAACTGTGGTGGACTTTTCTGAGGAGATGGATAGCCTTCTGTCAAAGCATCATCT  
 CAACAAGCCCTCAATAACTATGTACCTCCTGCTTACAACACATAAGGCTCTCTATTTATT  
 TAAATATTTAACTTTAATTTATTTTTGGATGTATTGTTTACTATCTTTTGTAAGCTACTAG  
 TCTTCAGATGATAAATATGGATCTTTAAAGATTCTTTTTGTAAGCCCCAAGGGCTCAAAA  
 ATGTTTTAACTATTTATCTGAAATTATTTATTATATTGAATTGTTAAATATCATGTGTA  
 GGTAGACTCATTAATAAAAAGTATTTAGATGATTCAAATATAAATAAGCTCAGATGTCTGT  
 CATTTTTAGGACAGCACAAAAGTAAGCGCTAAAATAAATTCTCAGTTATTCTGTGAACTC  
 TATGTTAATCAGTGTTTTTCAAGAAATAAAGCTCTCCTCT

|         | Sequence            | Tm |
|---------|---------------------|----|
| Forward | GCCCAAGCAGGCCACAGA  | 62 |
| Reverse | TGCCGCAGAGGTCCAAGTT | 60 |

Ifn alpha 1

>NM\_010502 NM\_010502 Mus musculus interferon alpha 1 (Ifna1), mRNA. 11/2006  
 ATGGCTAGGCTCTGTGCTTTTCTGATGGTCCTGGCGGTGCTGAGCTACTGGCCAACCTGC  
 TCTCTAGGATGTGACCTTCCCTCAGACTCATAACCTCAGGAACAAGAGAGCCTTGACACTC  
 CTGGTACAAATGAGGAGACTCTCCCTCTCTCCTGCCTGAAGGACAGGAAGGACTTTGGA  
 TTCCCGCAGGAGAAGGTGGATGCCAGCAGATCAAGAAGGCTCAAGCCATCCCTGTCTCTG  
 AGTGAGCTGACCCAGCAGATCCTGAACATCTTACATCAAAGGACTCATCTGCTGCATGG  
 AATACAACCTCCTAGACTCATTCTGCAATGACCTCCACCAGCAGCTCAATGACCTGCAA  
 GGCTGTCTGATGCAGCAGGTGGGGTGCAGGAATTTCCCTGACCCAGGAAGATGCCCTG  
 CTGGCTGTGAGGAAATACTTCCACAGGATCACTGTGTACCTGAGAGAGAAGAAACACAGC  
 CCCTGTGCCTGGGAGGTGGTCAGAGCAGAAGTCTGGAGAGCCCTGTCTTCTCTGCCAAT  
 GTGCTGGGAAGACTGAGAGAAGAGAAATGA

|         | Sequence              | Tm |
|---------|-----------------------|----|
| Forward | CCCGCAGGAGAAGGTGGAT   | 61 |
| Reverse | ACTCAGGACAGGGATGGCTTG | 60 |

Ifn gamma

>NM\_008337 NM\_008337 Mus musculus interferon gamma (Ifng), mRNA. 3/2007  
 GATAGCTGCCATCGGCTGACCTAGAGAAGACACATCAGCTGATCCTTTGGACCTCTGAC  
 TTGAGACAGAAGTTCTGGGCTTCTCCTCCTGCGGCTAGCTCTGAGACAATGAACGCTAC  
 AACTGCATCTTGGCTTTGCAGCTCTTCTCATGGCTGTTTCTGGCTGTTACTGCCACGG  
 CACAGTCATTGAAAGCCTAGAAAAGTCTGAATAACTATTTTAACTCAAGTGGCATAGATGT  
 GGAAGAAAAGAGTCTCTTCTTGGATATCTGGAGGAACTGGCAAAGGATGGTGACATGAA  
 AATCCTGCAGAGCCAGATTATCTTTTCTACCTCAGACTCTTTGAAGTCTTGAAGACAA  
 TCAGGCCATCAGCAACAACATAAGCGTCATTGAATCACACCTGATTACTACCTTCTTCAG  
 CAACAGCAAGGCGAAAAAGGATGCATTCATGAGTATTGCCAAGTTTGAGGTCAACAACCC  
 ACAGGTCCAGCGCCAAGCATTCAATGAGCTCATCCGAGTGGTCCACCAGCTGTTGCCGGA  
 ATCCAGCCTCAGGAAGCGGAAAAGGAGTCGCTGCTGATTCCGGGGTGGGGAAGAGATTGTC  
 CCAATAAGAATAATTCTGCCAGCACTATTTGAATTTTTAAATCTAAACCTATTTATTAAT  
 ATTTAAACTATTTATATGGAGAATCTATTTTATAGATGCATCAACCAAAGAAGTATTTATA  
 GTAACAACCTTATATGTGATAAGAGTGAATTCCTATTAATATATGTGTTATTTATAATTTT  
 TGTCTCCTCAACTATTTCTCTTTGACCAATTAATTATTTCTTCTGACTAATTAGCCAAGA  
 CTGTGATTGCGGGGTTGTATCTGGGGGTGGGGGACAGCCAAGCGGCTGACTGAACTCAGA  
 TTGTAGCTTGTACCTTTACTTCACTGACCAATAAGAAACATTCAGAGCTGCAGTGACCCC  
 GGGAGGTGCTGCTGATGGGAGGAGATGTCTACACTCCGGGCCAGCGCTTTAACAGCAGGC  
 CAGACAGCACTCGAATGAGTCAGGTAGTAACAGGCTGTCCCTGAAAGAAAGCAGTGTCTC  
 AAGAGACTTGACACCTGGTGCTTCCCTATACAGCTGAAAACCTGTGACTACACCCGAATGA  
 CAAATAACTCGCTCATTTATAGTTTATCACTGTCTAATTGCATATGAATAAAGTATACTT  
 TTGCAACC

|         | Sequence                | Tm |
|---------|-------------------------|----|
| Forward | GCATCTTGGCTTTGCAGCTCTTC | 63 |
| Reverse | ATGACTGTGCCGTGGCAGTAA   | 60 |

Cmklr1

>NM\_008153 NM\_008153 Mus musculus chemokine-like receptor 1 (Cmklr1), mRNA.  
11/2006

GAGGGAGGCTCTTAGGATGTTGTGCTCCGCGGGGCTCAGACGAAATCTTCTGTGAATGGA  
AGAAATGCTTCCAAGCAAACAGCCACTACCAGAACAACCTGAGAAAAGAGGCCAGAGCGCGA  
GTTCTCAAACCTGAAAGTCGCAGGAGCCGGAGGGGATATTGGAGAGAAGGTATTTCCAG  
TCACGCGCAGTAACAGACCAGCCAAGGACCAGGACTGGAGTTCTGTTCTACAACGGTGAA  
CAGTGAAAGGTCTCAAAGAGATGGAGTACGACGCTTACAACGACTCCGGCATCTATGAT  
GATGAGTACTCTGATGGCTTTGGCTACTTTGTGGACTTGGAGGAGGCGAGTCCGTGGGAG  
GCCAAGGTGGCCCCGGTCTTCTGGTGGTGTATCTACAGCTTGGTGTGCTTCTCTCGGTCTC  
CTAGGCAACGGCCTGGTGTATGTATCGCCACCTTCAAGATGAAGAAGACCGTGAACACT  
GTGTGGTTTTGTCAACCTGGCTGTGGCCGACTTCTGTTCACATCTTTTTGCCGATGCAC  
ATCACCCTACGCGGCCACTGACTACCCTGGGTGTTTCGGGAAGGCCATGTGCAAGATCAGC  
AACTTCTTGCTCAGCCACAACATGTACACCAGCGTCTTCTGCTGACTGTATCAGCTTT  
GACCGCTGCATCTCCGTGCTGCTCCCCGTCTGGTCCCAGAACCACCGCAGCATCCGCTG  
GCCTACATGACCTGCTCGGCCGTCTGGGTCTGGCTTTCTTCTTGAGCTCCCCGTCCCTT  
GTCTTCCGGGACACCGCCAACATTCATGGGAAGATAACCTGCTTCAACAACCTCAGCTTG  
GCCGCGCTGAGTCTTCCCACATCCCGCCACTCGCAAGTAGTTTTCCACAGGGTACAGC  
AGACACGTGGCGGTCACTGTACCCGCTTCTTTGCGGCTTCTGATCCCCGTCTTCATC  
ATCACGGCCTGTACCTTACCATCGTCTTCAAGCTGCAGCGCAACCGCCTGGCCAAGAAC  
AAGAAGCCCTTCAAGATCATTATCACCATCATCATCACCTTCTTCTCTGCTGGTGCCCC  
TACCACACCCTCTACCTGCTGGAGCTCCACCACACAGCTGTGCCAAGCTCTGTCTTCAGC  
CTGGGGCTACCCCTGGCCACGGCCGTCGCCATCGCCAACAGCTGCATGAACCCCAATTCTG  
TACGTCTTCATGGGCCACGACTTCAGAAAATTCGAAGGTGGCCCTCTTCTCCCGCCTGGCC  
AACGCCCTGAGTGAGGACACAGGCCCTCTCTTACCCAGTCACAGGAGCTTACCAAG  
ATGTCGTCTTTGAATGAGAAGGCTTCCGTGAATGAGAAGGAGACCAGTACCCTCTGAACC  
TCACCTGGGAATGTCCCCAAAGGTGCCACGGCCAGGGACGCCTAGGGACTTGTCTCCG  
GAAGTGGGAGACATGCCGGGAGCCTTTGGGAATGCTCCAATGCCACTGAATTTTGCACA  
AGCGGCTCATGTTTTAAGTGGGTTCCCAAGTGTGGACACTCTTCCAGTAAAATGGCAG  
GCAAGCAACCCGAGCCTTACAACAGGAGCAGGGGACCGACTGTGACTGACTCAGAAAAG  
GGAGCATCTCTGAAGCCAAGACTTGAGCTGTGACCAACATACAGGCCAACATACACGATG  
TCGCCGTGCATGCCCTGAACATGCTGCGCAGTCTTTCGTGGGTGAGGAAGTTACCGCAAAC  
CCATTGCAGACCTGTTATGGCAACATGACAGTCAAACCAACAAAAGCCCACTACACCCCAA  
CATCTCCAAGACCTTGACTTTGGATTTCAGAAGAACGGGGGGTGGGGGAACGAGGACC  
TGAGGGCTTCATGGAACTTTGCAAGGGCAACACAGGGTTCTGTGTGTGTGTGTGTGTGT  
GTGTGTGTGTGTGTGTGTGTGGTAAAGAGGAGGAGACGGAGAGCAGAGAATCCCAAAG  
GATGTGGGTACAGGATATCTTACACCATCATGCCACGGAGGAGACAGAGAGCTATAGTGG  
TGTTGCTTTGGGGTTTCAAGTGGTGGCAGCTCTTTGCTTCAGTGTGTATACTCACTTAGC  
ACTGAACCCTGAGGCTGGGTGGAGCCTTTTACAGAAGACTCCATCTGATCCCATCCCA  
TCCCCTCCCCTCCCCTCCCCTCCCCTCCCCTCCCCTCCCCTCCCCTCCCCTCCCAGGGTC  
TCTTCTCCCCTAATCCCCTCAATGCTGGCTGGAAAAAGGGCTTAGAATGTCCCAGAGACT  
GGTCTAGAACGGAGTTTTGGGACTCCATCTTACAGAGTGTCTTCCCAAGGCTGTCTGGCTG  
GTCATCTGGGCAGCTGACCAGCTTTCCCAGTCTTCTTGAATGTATCAACAGCCCCGTG  
GGCAGCCCAGGATCAGGCTTTCTCCCCTGGCAGGAAAATGGCTCACTACCCCCCCCC  
CCCACACACACTGTTTCATCAGTAGCAAAAGACCCGAGCCCTGCTCCGTCTGGCTTGAC  
ATCATTCCTCATGGAGGAGGGGTGGTGTGCACTTCGTTAGCATGTCCCATGCATGTTAAG  
TATTTACATGCAGCTTCTCATTTATTTCTTACAGAAAACCTCATATGTATGAGGACAAGC  
AGAGACTCAGAGAGTTAAGCAACTGGCCCCGAGGGGACCCAGTTAGATGTTGGTAGAGAC  
TGGATTCGAATCGCAGTGGGCTTGGCTCGAAGGAAGATGAAGAGTCTGGGGAAACTAATA  
GGTTGGGGTTTTAGCCATAAATGCTGTTTTGTCTGTTTTTTCCATGTAAACATCTTAAT  
GGTCAAAAAAAAAAAAAAAAAAAAAAAAAAAAAAAAAAAAAA

|         | Sequence            | Tm |
|---------|---------------------|----|
| Forward | AAGAGGCCAGAGCGCGAGT | 61 |
| Reverse | CTCCAATATCCCCCTCCGG | 60 |

CXCL1

>NM\_008176 NM\_008176 Mus musculus chemokine (C-X-C motif) ligand 1 (Cxcl1), mRNA. 1/2007

CATGATCCCAGCCACCCGCTCGCTTCTCTGTGCAGCGCTGCTGCTGCTGGCCACCAGCCG  
 CCTGGCCACAGGGGCGCCTATCGCCAATGAGCTGCGCTGTCAGTGCCTGCAGACCATGGC  
 TGGGATTCACCTCAAGAACATCCAGAGCTTGAAGGTGTTGCCCTCAGGGCCCCACTGCAC  
 CCAAACCGAAGTCATAGCCACACTCAAGAATGGTTCGCGAGGCTTGCCTTGACCCTGAAGC  
 TCCCTTGGTTTCAGAAAATTGTCCAAAAGATGCTAAAAGGTGTCCCAAGTAACGGAGAAA  
 GAAGACAGACTGCTCTGATGGCACCCTCTGGTGAACGCTGGCTTCTGACAACACTATACA  
 ATTTCTTTTGGAGGGTCTATTTATTTATGTATTTATTTATTTCCACAAAAGTGTGTGGTTTT  
 TATTTTACATTAATATTTAACAGTGTGGATACATTTTCATCGATGGTAGTTTCAGTTCTGCT  
 TGTTTCAGTTTAAAGATGGTAGGCTTAAAATATTTTCATTAATAATAATTTATTGGGAGA  
 CCACTAAGTGTCAACCACTGTGCTAGTAGAAGGGTGTGTGCGAAAAGAAGTGCAGAGAG  
 ATAGAGTTTAGTATTATGTTTTGTATGTATTAGGGTGAGGACATGTGTGGGAGGCTGTGT  
 TTGTATGTCTTTGAAAAGAATGTCAGTTATTTTATTGAAAAGTCGTCCTTTCATATTGTATGGT  
 CAACACGCACGTGTTGACGCTTCCCTTGGACATTTTGTGTCTAGTTGGTAGCCATAATG  
 GGCTTTTACATTCTTTAACCCCTGTTTCTCCTGGTCTCGTCTCGCTCGGGACAGAGACGTT  
 CAAAGGACTGTTACAAATGAAGTAAAAATAAAAGTTTTATTAAG

|         | Sequence           | Tm |
|---------|--------------------|----|
| Forward | CCCACTGCACCCAAACCG | 62 |
| Reverse | GGCAAGCCTCGCGACC   | 60 |

### CXCL2

>NM\_009140 NM\_009140 Mus musculus chemokine (C-X-C motif) ligand 2 (Cxcl2), mRNA. 1/2007

GCTTCCTCGGGCACTCCAGACTCCAGCCACACTTCAGCCTAGCGCCATGGCCCCCTCCCAC  
 CTGCCGGCTCCTCAGTGTGCACTGGTCTGCTGCTGCTGCTGGCCACCAACCACCAGGC  
 TACAGGGGCTGTTGTGGCCAGTGAAGTGCAGTGTCAATGCCTGAAGACCCTGCCAAGGGT  
 TGACTTCAAGAACATCCAGAGCTTGAAGTGTGACGCCCCCAGGACCCCACTGCGCCCAGAC  
 AGAAGTCATAGCCACTCTCAAGGGCGGTCAAAAAGTTTTGCCTTGACCCTGAAGCCCCCCT  
 GGTTCAGAAAATCATCCAAAAGATACTGAACAAAAGGCAAGGCTAACTGACCTGGAAAAGGA  
 GGAGCCTGGGCTGCTGTCCCTCAACGGAAGAACCAAAAGAGAAAAGAAAAACAAACAGCA  
 CCCGGAAGCCTGGATCGTACCTGATGTGCCTCGCTGTCTGAGAGTTCACTTATTTATTT  
 ATCTATGTATTTATTTATTTATTTAATTCCATTGCCAGATGTTGTTATGTTTTATTTTATGAT  
 ATTTAAAGATATGCATTCGCTAATTCAGTGAATATCTTAAAAGGTCATTTTAATATGTT  
 AAAGTTTATTTAATAATGTTTAAATGTGTTCAATTAAGTTATTTAACTTATATAGTTGG  
 AAGGTGATAAAATTTTTAAACCTATTTATTCATTAGTTTCTGGGGAGAGGGTGAGTTGGGA  
 ACTAGCTACATCCCACCCACACAGTGAAGAGACTGGGGATAAGGGGTGGGGGTGGGGAC  
 AAATAGATGCAGTCGGATGGCTTTCATGGAAGGAGTGTGCATGTTTCACATCATTTTTTTG  
 TAAGCACCGAGGAGAGTAGAACAGCTGTTATTTAGGTTTCAGTGTGTTGTAACCTGTATGT  
 ACAACATTTTTGATGCTGGATTTCAATGTAATGTTGTGAGTAACCCCTTGGACATTTTATG  
 TCTTCCTCGTAAGGCACAGTGCCTTGCTTAGCAATGTTTTGTGATGCCTTTTTCGTGTCT  
 TGAAGTGGACACATTTATTTATTCATGTATTTTTTACAAATAACAAAAATAAAAAACGTCT  
 GTT

|         | Sequence                    | Tm |
|---------|-----------------------------|----|
| Forward | AAAGATACTGAACAAAGGCAAGGCTAA | 61 |
| Reverse | GAGGGACAGCAGCCCAGG          | 60 |

### CXCL5

>NM\_009141 NM\_009141 Mus musculus chemokine (C-X-C motif) ligand 5 (Cxcl5), mRNA. 11/2006

GTTTCCTGCCTGAAGGAAGAGAGAGAACAGATAAAAAGGGGTGCAGTGGGTTTTGAGAACAC  
 CATAGTGTCTGTAGAGCCCCAATCTCCACACCTCCTCCAGCATATCCCGAGCTGGTGCT  
 CCCTGGTCCGGGATCTTGTCCACAATGAGCCTCCAGCTCCGCAGCTCCGCCCGCATCCCC  
 AGCGGTTCCATCTCGCCATTCATGCGGATGGCGCCGCTGGCATTCTGTGTTGCTGTTACG  
 CTGCCGAGCATCTAGCTGAAGCTGCCCTTCCCTCAGTCATAGCCGCAACGGAGCTGCGT  
 TGTGTTTGTCTAACCGTAACTCCAAAATTAATCCCAAATTGATCGCTAATTTGGAGGTG  
 ATCCCTGCAGGTCCACAGTGCCTACGGTGGAAGTCATAGCTAAACTGAAAAACCAGAAG  
 GAGGTCTGTCTGGATCCAGAAGCTCCTGTGATAAAGAAAATCATTTCAGAAAATATTGGGC



AGTGACAAAAAGAAAGCTAAGCGGAATGCACTCGCAGTGGAAAGAACGGCCAGTGTTCAA  
TAGAAAGATTTCTGAGGACTCTGACCCCAGTGAAGATAAGAAGAAAGGGCTGATTCTCTC  
CACCCACGGATTTTCTTTATGAACTCCCTGCTTTGATGAGAAAAGGGAAACCATTGTCCC  
TGAAGCTTCTCTGCTCATCTCACAAAGTGTATTTAGCAAAAATATTTCTTATTCTTTCTTAT  
CTGTGCACACTATCGGAAATTGTGATACTTTAGTGTGTAAGTCAAGAATCATTGGTTGTTA  
ACCTTTCAAAAATGTCTTGAAGTGAAGGTGACTATTGCATTGTCTCCGGAATATGTATATG  
TATATGTATATGTATATGTATATGTATATGTATATGTATATGTATATGTATATGTATATG  
TATATGTATATGTATATGTATATGTATATGTATATGTATATGTATATGTATATATATATAT  
ATCCTTTGTAATGTTTCATGAGAAGGCAATGCTGTCATACTCTCTCTCATAAAAATGGGGAC  
CTCTTTTACTGTTGTTTCTTGGGTGTGTTAAGAGTGTTCCTTACGTCTGAGCCTGGGCTGG  
CATATAACTTTTATGGTTTTAGAAAAGCTGCTGTGTGCATGCAGAAACCTATGTAGAACACA  
GTTCCCTTATTTAGAAATTTCTAAATGTGTAAGTTCTAGAAGGATCAATGTGTTCTCATCTT  
ATAATTTTAGACATTTGATGTCTTCGTAGTATGGCATAATGTCATGACTTACTCAACAAA  
CTGTATACTATTTATTAATTATTAAGTATTTATTAGTATTACTATTTGGGCCACTAACT  
ATATATTTTAGATAGTATATATTTTAGATAGGTGAAGAAGGTAAGAAGCAAGGAAATTC  
TTACCTAGTTTTTCAAAAAAACATTTAAAAGTTATTTCTAGGGAGAGAAACTTTAGCAAA  
TATCTATACTCTTAGAGTTTTGAAAACATACTTAACATGTTTGAATATGGATTGCTGAGA  
TATTTAGATGTCTGTAGTGTGTCTTTTAAAGAGTGTGCTTTGTTATAAGGAGATTAATGA  
ATTCATCACATCCATTATTTAAGCCTGTACATCTTATAGTGTCTCACTTCTTTATATTA  
CTCTTTTGGAGAAAATAAAGTAGCTCTAGATTCCA

|         | Sequence              | Tm |
|---------|-----------------------|----|
| Forward | GGCATTCTGTTGCTGTTACAG | 62 |
| Reverse | TGAGGAAGGGCAGCTTCA    | 60 |

**CXCL12**

>NM\_001012477 NM\_001012477 Mus musculus chemokine (C-X-C motif) ligand 12 (Cxcl12), transcript variant 3, mRNA. 2/2007

CGCCTCCCCTGCGCACTTTCACTCTCGGTCCACCTCGGTGTCCTCTTGCTGTCCAGCT  
CTGCAGCCTCCGGCGCGCCCTCCCGCCACGCCATGGACGCCAAGGTGCTCGCCGTGCTG  
GCCCTGGTGTGCGCCGCGCTCTGCATCAGTGACGGTAAACCAGTCAGCCTGAGCTACCGA  
TGCCCTGCGGGTCTTTCGAGAGCCACATCGCCAGAGCCAACGTCAAGCATCTGAAAATC  
CTCAACACTCCAACTGTGCCCTTCAGATTGTTGCACGGCTGAAGAACAACAACAGACAA  
GTGTGCATTGACCCGAAATTAAGTGGATCCAAGAGTACCTGGAGAAAAGCTTTAAACAAG  
GGGCGCAGAGAAGAAAAAGTGGGGAAAAAAGAAAAAGATAGGAAAAAAGAAGCGACAGAAG  
AAGAGAAAAGGCTGCCAGAAAAGGAAAAACTAGTTCCCCGCTTCTGCGGATGGACCGCA  
GTGCGCTCTGCTCTGGCGCTTTGTAAGTCTGCTCCTCCCTCTTTCGGGGGCGACCCCCACAC  
TCCGGGCGAGGTGCTCAAACCTGACGGTAAACTCTTCCCTCTTTCGGGGGCGACCCCCATAC  
CCCGGGGCGGGTGTAGGCTTTTCTGCCCTGGTGGCCACACCAGCTGCTGTATTTATGT  
GCTTCATAAGGCCCTGCTCTGTCTGCTAAAGCTATGAAGAAAGATGTGCAGAGACTGGGG  
TGGAGACTAAGCCAAAGAGGAGCTGCCTAGCCTGGCAGCATTGCCCCGAGCTGAGCCCCC  
TTGGCCAGGACTTCACAAGGCTCACACCTACAATCCCATGAAGGCCAGGGTGGTCTGCTT  
AGCCAGGAAAGGGCAAGTGCCTTCCCCTCGGCCACACTGCCCTTGTGGCCTTCTCGGGA  
CATGTGGTAACTGACTTGTCTCAGGCCACCCGCAGCTTTTCCAAATACCTGCAGCCTT  
CAGCCCTGCTGCCCTGCCTGTGGGAGCAGCTTTGACTCCAGTCCAGAAGGGTTTTCTGCAG  
ACTGTGTTGGGTGAGACGCAGAAAAGGATGAAATCTCAGAACACATGTCAGCTGCTTCTCA  
GGAAATCTTTTCTTTGGACAATCACTTTAGAGTCTTTAAACGGGTCTCTCGTGGGGAGG  
ATAGATGTGCTCTGGAATTTCTGAAGGACCAGCAGCTTTCAGGGACTCTTAGTCTGTCTCT  
TCCCCACTTTTGGTCCCAACATCCCTGGGATGGTGTGCTGTCTGGGCACCACGGTCTCCA  
TCCTCACTCCTGAGAGATTTCTGCCTTCTGTGAGTTGGGTAAAGCTCTGGAATTATCTA  
CTATCCCAATCCACTACCCTCACCTGGCAATATTTGTCTGTTTTTTGTGTTGTTGTTGTT  
TGTTTTTGTCTTTTCCAGTTTGAATTAGAAGGCAAGGCTCTGATTTTAGTAGTGTTTTTG  
GAAAAGGACTTTTTCTTACCTTCTTTCCTTTCCTCATGTGTACACACACACACACACTCT  
TGTACCCCAGACCTCTGGGTATAATTTTCAATAATGGTGCAGAAAAGAAGAAATGATCTGA  
AGATGTGTTAAATGGATTGCAGGGGAAGGAAGGCCAGGGCCCTGTGTGTCATGCCCTCT  
TGGGTTCCAAAGTTCTATGTTCCCTTAGAGGTTCTAGCATTAAACAGATAAAGCCCTTCAT  
GGTCTGGCTGAGGAAGAGTCTTGGTAGGGGATTTCAGGGAAGACCCGTGTTACCAGCTC  
TTACCCTTTATCTGGACAGCTCTCCTACCCTGTATCTTCTCCTCAGATCTGAGGATAGCA  
GGCTGGACTATTGGTGGGCACCTTTCAAGCCCAGGGCTACTGTTTGTCTGTGGCAGCCG

GCTACAGTCTCGTCTGAGTGGCCTCATCTGGACCCTTCCTGTTATTAATAAAAACGCTTCT  
GGAGGCCAGATCTGTGCTCAAGCCATAGTTCTGCTTAGAAAAGGGATGCCCCACCCTTACC  
GGACACTGGGAAGAAGCTGTTGGCCCCCTAGAAAACCAAAGGCCAAACTGAGGCTGCCCTGAG  
TTGGAAGACCCTTTCTGAAATGCCCATGGACTCTGCCTCCCAACCATTTCGTCTCTCACT  
CCTAGCAGAGCTGTCTGTGCAGACTGTTTCTTAGGAGGCACAGCAAGCTCCAGGGAACCC  
TCTGTGCTTATGAAGCTCGTCTGGTGGGCAACCCAGCCCACTGGACAGAGTCTTCATGG  
AAATGCCTGGGAAGCTGATTTTCATCTAAGGATGGGTTGAAGTAGGATGTGCTCCTGCGAC  
TTCTCAGGCAGGTGAGAGGGGTAGTCTTACACTGTCTAGCATAAAACGCCTTCCGGAAGG  
ACCTGCAGCTCCAGAGACCACCTCCTGAGCACCAAGACCTCTTCTGGTGGTGTGGAACCA  
GCCAAGAGATTTCAAGGAAGAGTGATTATTTGATGAATGCTATGGGAATGGCCTCTTCTC  
TTGGAGTTCTGAGGCCTGGGGATGCCAGGAACACTGGGCACCTGCTGCTGTTAGGGCCA  
ATGCATAGTCTCAGCACCGGTGTCTAAGGTTAAGGCGGTGCGCCTTGTCTATGTGCTCCT  
TGTACCATGCCATCTGTGCCAGTGTGTGTCTGCCTCACCTGTGCTTGACATGTTACCC  
ATCTTCTCTGCTTCCCGCCACCATCCAGATCCTCAGCGGCCGCCCGGCTGTGCCCTTCC  
CTGCTCTCCCGCTCTCTCAGGCCTCGGAAGGAAGATCGGTGGCTGCGAGCTGAACTAAGG  
AGTAGGGCCTGTGGCTCAGCGCTAGGCCACGCACGCAGCATCCCAGGCATGTGGTGAGAA  
ACTGCCTTAATGTGTCTCCTCTGTTCTTGTCAACAGGAGGCTCAAGATGTGAGAGGTGTG  
AGTCAGACGCCCCGAGGAACCTTACAGGAGGAGCCTAGGTCTGAAGTCAGTGTTAGGGAAGG  
GCCCATAGCCACTTCTCTGCTCCTGAGCAGGGCTGAAGCCGTTTGCAAGGGACTTGCTT  
TGCACAGTTTTGCTGTACTTTTACATTTTTATTATGTAGCAAGATACATGGTGATTTTTTT  
TTTTTTTCAATTTAGCCTGATTTTTCAACGTCATTGGTGACAGGCCAAGGCCACTATGTTAT  
TTCCTTTGTTCTGGTATCCTTCCCTTGGAGGACCTTCTCTGAGTAGTGGCTCCCCAGGTT  
TGTCTTTGAGCTGAGGCAGGAGGCTCACCCATTCTTCTGAATAGGAACTGGGTGTTCCC  
ACCCCCAAGGACTGCAGGGCTTTCCTCAAGCTGAGGCAGGAACGTGAGGCCAGGGAAGAG  
TGAGCTTACCCTCATCCCACGCTGTCTCCTCAACCCACCATGCTCATCATTCTGTCTC  
ATCCATCCATCCATCCATCCATTTCATCGCCATGTGTCCGCAAGACTGTCTCCATGACCCT  
GAAAAAGGACTCTCGAGATGAAATCCTTTATTCAAATGGGACAGCAAGAAGGAAAAGCCA  
ATGTCTGGTGTCTCTCCCCCGCCCCCTACCCTGCGCGCATCTATGTCTTGTGTTGGAATAT  
TGTCTCTTCAACCCCTTTCATGTCTCTTCTCACTCATGATCGATGTCTTGTCTGTGCAC  
TGTCTCTAACCACAAATGCAAAGGCTGAGTGTGAGGTGATGGCCCCGAGGTCCAGGTTGTA  
GTCATGGAAAAGACCCTGCTGTCTCCCTTCTCAGGGGGCCCATTTTAGACACACAAAAGCC  
CAAAGAAAAGGTGGTTTTGCAACAGTGCTTAGCTCGAGCCTCCATATTTCCATAACTGTTAG  
CTTAAAACTGTGGGGTTTTACCTTCTGGAACCAAATGCATTCCTTCTGTTGAGGAGTAAC  
AGGTCTCAATTTCTTTCAATTAATTTTAAAAAGTCAATCACTAAGAGCATCGGCTTTGGGC  
CCTGATGGGCAGGCATTTCCCTGGAAGGGGGTGAACCTACCTACCTCTCCTCAAGACAGC  
CGAAGGGTGGGATTGGTGCCGCTCTGGGAAGCGTGGCCCCAGGAGTTTTGTCTCTGCAG  
TTTTTAATGCAAGTTCACTGCCACTTTGACAAAAGCCCAATTAGAAGCCAGTCTCTAGTT  
CCTTAAACAAAACAGACAGAGTAAGGAAAGGAAGGAGGGTGGCAGCCAGCTGGCTGGACA  
CTCGAGAAAGACGGGGAAGTAAGCTACAGAAAGATAGTCTTCAAAAACAGGTGTTTGAGA  
GTGAATACTCTGTAGAATTGTTAGTGGGGTGTGTGTGGTGGTGGGGGGATTTCTACA  
AAATAGTCTTTAAGTTGAGTTTACAGCAGATGAAAAATCCAACCAGCAAAAATTTTGATC  
AAATTTGAACAAAAACCCAAAAACCTAAAACTGTTGAGCAGGTTGCGATGAGGAGCACAG  
GGCTAGCTGCAGAGCTGGATCCTCAGGAGGATAGCGAATTATTTTCAACCCTGGAATAGA  
AACCACACACTGGCTTGTGTGCACCAGCCACTTTGCATCTAATCCAAGCTTTGAAGGGT  
GTTGCTTGGGAGGAAACAAATACAGCCTTCCATCTTCACTCCAGTTAGGGATCCTTTCAA  
AGTCTCCTTACAGTGAGGAAAAAGAGAAGGGTAGAACTTTAGGGAGCCGGATTTGTGT  
ATCAATTCCTCCGCTGACAGTCAGTTTCTAGATGGAGACAGCCTGCTTAAAGCAAATCCG  
AATTTAAATAGGACATTTACATCGGAAAAGTCTCTCCCTACCTTAATCCCCCATTTCTCTT  
GCTTTCAAAAATACAAGCACAGCAGTCTTGAATGGCTGTTGACCCAGGGCACCTAGCTGT  
CCCTGCTGGTCTTGGGGCTGCCAGAATTCCTTGGGCGCCAAGCAACCTGCCAGGTAGCC  
AGTCCCTCTGTTACAAGCCTTTGCATCTGGATAGGGAAAAGGGTGGAGACATACAGTCTG  
CTTTGTGTTGAAACCCAGATTTGTACCCTGTGTTTATACACTGCTGCTGGCTCCCGAGGA  
CAGTGGGACTTTAGCAAGGAAGTGCAGCCGAGGGTAAAGAGCCCTCTGGTTCATTGCCT  
GATCGGCTTTGAGAGAGGGTTTTGGAGGGCAAGGGCTGCATTCCTCTGAGGGACTTGGCC  
TGAGGCCTTTCCGGCCTCTCCAGTGGGTTCTGTTTATCCTCTCATGGGTGATTATCTCAG  
TGGTGTCAACCAGGGCTTCTCCAGAAAGTCAAGTCAATCCCCAGGCCGTGCACCCTTTTCA  
GCTGGATGAGAGCCAGGGATGCATTTCTCTCAAACAGCTACCCTGGCCCATTTTAAGGTA  
ATCTCATTCTTCAAAAATGTTCCATAGAATCCTCCAAATCCCCCAGCAGACTTCTACCCT  
CGCCAAGTTCCCAAAAACCCACTCAGCAAAGTTGCCAACCTCGACGGGCTAGCAGTGTCTA

AGCAGCGATGGGTTTCAGTGTGGTGTGGTGAATACTGTATTTTTGTTTTAGTTCTGTCTC  
 CCAGATAATGTGAAAACGGTCCAGGAGAAGGCAGCTTCTATATGCAGCGTGTGCTTTCT  
 TATTCTTATTTTTAATATATGACAGTTATTTGAGAAGCCATTTCTACTTTGAAGTCATTA  
 TCGATGAAAGTGATGTATCTTCACCTACCATTTTCTAATAAAAGTTCTGTATTCAAATAT  
 A

|         | Sequence                  | Tm |
|---------|---------------------------|----|
| Forward | CCTTCAGATTGTTGCACGGC      | 60 |
| Reverse | TCTCCAGGTA CTCTGGATCCACTT | 61 |

IL8 R beta

>NM\_009909 NM\_009909 Mus musculus interleukin 8 receptor, beta (Il8rb), mRNA. 3/2007

AGTAGTTTCTCATCACGGCTGCCTCACTTTCTTCCAGTTCAACCAGCCCTGACAGCTCC  
 CAAGCCTTGAGTCACAGAGAGTTGGGAGCCACTCTGCTCACAAACAGCGTCGTAGAATA  
 CTGCAGGATTAAGTTTACCTCAAAGATGGGAGAATTCAAGGTGGATAAGTTCAACATTGA  
 AGATTTCTTCAGTGGAGATCTTGATATTTTTCAATTATAGCTCTGGCATGCCCTCTATTCT  
 GCCAGATGCTGTCCCATGCCACTCAGAGAACCTGGAAATCAACAGTTATGCTGTGGTTGT  
 AATATACGTCCTGGTGACTCTGCTGAGCCTTGTGGGGAACCTTGGTGATGCTGGTCAT  
 CTTATACAACCGGAGCACCTGCTCTGTACCGATGTCTACCTGCTGAACCTGGCCATTGC  
 TGACCTGTTCTTTGCCCTGACCTTGCCTGTCTGGGCTGCATCTAAAAGTAAATGGATGGAC  
 TTTTGGCTCAACCCTGTGCAAGATATTCTCATACTGAAGGAGGTTACCTTCTACAGCAG  
 TGTTCTGCTACTAGCCTGCATCAGCATGGACCGCTACCTGGCCATTGTACATGCCACAAG  
 TACACTGATCCAGAAGAGACACTTGGTCAAGTTTGTGTGCATAGCCATGTGGTTACTATC  
 AGTAATTCTGGCCCTGCCCATCTTAATTCTACGAAATCCTGTTAAGGTAAACCTTTCTAC  
 CTTAGTCTGCTATGAGGATGTAGGTAACAATACATCCCCTTTGAGGGTCGTA CTGCGTAT  
 CCTGCCTCAGACTTTTTGGCTTCTCGTGCCGCTGCTCATCATGCTGTTCTGCTACGGGTT  
 CACACTGCGCACCCCTCTTTAAGGCCACATGGGGCAGAAGCACCGGGCCATGCGGGTCAT  
 CTTTCGCTGTCGTCCTTGTCTTCTGCTCTGCTGGCTGCCCTACAACCTGGTTCTGTTTAC  
 AGACACCCTCATGAGAACCAAGCTGATCAAGGAGACCTGTGAGCGCCGCGATGACATTGA  
 CAAGGCCTTGAATGCTACGGAGATTCTTGGCTTCTCCACAGCTGCCTTAACCCCATCAT  
 CTATGCCTTTATTGGCCAGAAATTTCCGCATGGACTTCTCAAGATCATGGCTACTTATGG  
 CCTTGTGTCAGCAAGGAGTTCTTAGCCAAGGAGGGAAGGCCTTCTTTTGTAGCTCGTCTTC  
 AGCAAACACCTCTACTACCTCTAAAGACTGTTACCTAAACGGTGGCCCCCTCGGGGTT  
 CTTCTTGTCTTTTACAGTGGCTCATTACCAGAGACTGTGGTATTTGAATTGATGCAGCCC  
 CTCTCTACAATTACAGGGAGAAAAGGTCACGTTCTTAGCAGAGCCCCCAGAGTTTAGA  
 ACCCCCTATATTGGCTGTCTGCTCCCTTCCATCTTGGTATGCCTACTGATAGAGTTGATC  
 CATCCTAACACTAGACCCCAAACTCTTTTCTAAGAAGCACACGTTACAATTACAGTGA  
 GATACTGCCTCTACCCATCAGAACAGTTAGCAGTAAAAGGAAGAGGTGGAGGAGAGAAA  
 ATGGCAAGTGACAATGAGGAAGTAGAAAAAGGAACTCTTACCTTACCAGTAGACGAGT  
 ACCAGAGTCCCTCACACAGGAACATAGCATAGCAGTTTTTCCATTTAAAAAAAATTAAG  
 GGCTGGTGAGATGGCTCAGTGGGTAAGAGCACCCGACTGCTCTTCAAAGGTCCGAAGTT  
 CAAATCCCAGCAACCACATGGTGGCTCACAACCATCTGTAACGAGATCTGATGCCCTCTT  
 CTGGAGTGTCTGAAGACAGCTACAGTGTACTTACATATAATAAATAAATAAATCTTTAAA  
 AAAAAAATTAATATAGAATTGGCATGTAATCCAGCAAGTCCATCTCTAAGTAGGGTAC  
 CTAAAAAAATGAAAGCCAGGGTTTCAGACATTTGTATGCTGATACTCACAACAGCATTAT  
 TCATCATGAAAATGATGGCCAACAGATGAATGGGTAAGTTAAACAAGGTGTCTCTACACA  
 ACAAAGAGCGTCCACAATGAGAAGTGCCAAAAATAATCAAATAGTGTGACTGGAGGCT  
 GGGTGAGGAAGGGTGGGGAGTTTCGTGTAGAAGACACAGCTCCAGTTAGGGATGATGGGAA  
 AGCCCTGAAGGTGGGCCCTGATCCCTGTGTAGTAGTGTGAATGCACTCATTACCACTGTA  
 ACAAAGTGTAAAATGAAAGCTGAGTATTGCTCCCTGGGAGAGTGCTTATTTAACATTT  
 CTAAGAACTCAGGCTCAAATCCTAGCACCTCGACAAACAAACAAACAAACAAAAA  
 GCTAAAATGTTTATTTTGTATGTGTTTTACCTCACTTTACCAAAAATATAAAAAATC  
 TAAGTCTAAAAAATGTTTACCATCCCATAAAACAACCACCAAAACCCAGACACTAGGCAGT  
 GCCAACAAGAACCTGCTGACAGGAGGCTGATATAGCTGTCTCCTGAGGAGCTCTGCCAGT  
 GCCTGGAAAAATACAGAAGTGATGCTCACAATCATCCATTGGATAGAGGACAAGGTCCCA  
 AATGAAGAAGCTAGCGAAGGTATCCAAGGAGCTAAAGGGGTCTGAAGCCCCAGAGGAGGA  
 ACATCAGTATGAACTAGCCAGTACCCCCCAGAGCTCCTTGGAACTAAACCACCAATCAA  
 AGAAAACACATGGTGGAACTTGTGGCTCTAGCTGTATATGTAGCAGAGGATGGCCTAGTC  
 AGTCATCAATGGGAGGAGAGGCCCTTGGTCTGTGAAGGCTCTATGCCTCAATATAGGGG

AATGCCAGGACCAGGAATGGGAGTAGGTGGATTGGGGAGCAGGGGGAGAGGGAAGGGAAT  
 AGGGGATATTTGGAGGGGAAACTAGGAAAGGGGATAACATTTGAAATGTAAATAAAGAAA  
 ATATCTAATAAAAAAATGTTCTTTAACCCTGAACCAATGCAGAACTATCTACCTTATA  
 ATTTCTTGTAAGTGTGACTATTAAATGTCGTTTTAAAAAATA

|         | Sequence              | Tm |
|---------|-----------------------|----|
| Forward | GCGATGACATTGACAAGGCC  | 60 |
| Reverse | GGGTTAAGGCAGCTGTGGAGG | 62 |

**IL18**

>NM\_008360 NM\_008360 Mus musculus interleukin 18 (Il18), mRNA. 3/2007

GGCACAGCTGGACCTGGTGGGGTTCTCTGTGGTTCCATGCTTTCTGGACTCCTGCCTGC  
 TGGCTGGAGCTGCTGACAGGCCTGACATCTTCTGCAACCTCCAGCATCAGGACAAAGAAA  
 GCCGCCTCAAACCTTCCAAATCACTTCTCTTTGGCCAGGAACAATGGCTGCCATGTCAG  
 AAGACTCTTGCCTCAACTTCAAGGAAATGATGTTTATTGACAACACGCTTTACTTTATACT  
 CTGAAGAAAATGGAGACCTGGAATCAGACAACCTTTGGCCGACTTCACTGTACAACCCGAG  
 TAATACGGAATATAAATGACCAAGTTCTCTTTCGTTGACAAAAGACAGCCTGTGTTTCGAGG  
 ATATGACTGATATTGATCAAAGTGCCAGTGAACCCAGACCAGACTGATAATATAACATGT  
 ACAAAGACAGTGAAGTAAGAGGACTGGCTGTGACCCTCTCTGTGAAGGATAGTAAAAATGT  
 CTACCCTCTCCTGTAAGAACAAGATCATTTCCTTTGAGGAAAATGGATCCACCTGAAAATA  
 TTGATGATATACAAAGTATCTCATATTCTTTTCCAGAAACGTGTTCCAGGACACAACAAGA  
 TGGAGTTTGAATCTTCACTGTATGAAGGACACTTTCTTGTCTTGCAAAAGGAAGATGATG  
 CTTTTCAAACCTCATTCTGAAAAAAAAGGATGAAAATGGGGATAAATCTGTAATGTTCACTC  
 TCACTAACTTACATCAAAGTTAGGTGGGGAGGGTTTGTGTTCCAGAAAGATGATTAGCAC  
 ACATGCGCCTTGTGATGACCTCGCCTGTATTTCCATAACAGAATACCCGAGGCTGCATGA  
 TTTATAGAGTAAACACGTTTATTTGT

|         | Sequence                 | Tm |
|---------|--------------------------|----|
| Forward | ACCTCCAGCATCAGGACAAAGAAA | 62 |
| Reverse | CTGGGCCAAGAGGAAGTGATTT   | 60 |

**IL-25 (IL-17e)**

>NM\_080729 NM\_080729 Mus musculus interleukin 25 (Il25), mRNA. 11/2006

ATGTACCAGGCTGTTGCATTCTTGGCAATGATCGTGGGAACCCACACCGTCAGCTTGGCGG  
 ATCCAGGAGGGCTGCAGTCACTTGGCCAGCTGCTGCCCCAGCAAAGAGCAAGAACCCCCG  
 GAGGAGTGGCTGAAGTGGAGCTCTGCATCTGTGTCCCCCAGAGCCTCTGAGCCACACC  
 CACCACGCAGAATCCTGCAGGGCCAGCAAGGATGGCCCCCTCAACAGCAGGGCCATCTCT  
 CCTTGGAGCTATGAGTTGGACAGGGACTTGAATCGGGTCCCCCAGGACCTGTACCACGCT  
 CGATGCCTGTGCCACACTGCGTCAGCCTACAGACAGGCTCCCACATGGACCCGCTGGGC  
 AACTCCGTCCCCTTTACCACAACCAGACGGTCTTCTACCGGCGGCCATGCCATGGCGAG  
 GAAGGTACCCATCGCCGCTACTGCTTGGAGCGCAGGCTCTACCGAGTCTCCTTGGCTTGT  
 GTGTGTGTGCGGCCCGGGTTCATGGCTTAGTCATGCTCACCACCTGCCTGAGGCTGATGC  
 CCGGTTGGGAGAGAGGGCCAGGTGTACAATCACCTTGGCAATGCGGGCCGGGTTCAAGCC  
 CTCAAAGCCCTACCTGAAGCAGCAGGCTCCCGGGACAAGATGGAGGACTTGGGGAGAAA  
 CTCTGACTTTTGCATTTTTTGAAGCACTTTTTGGGAAGGAGCAGGTTCCGCTTGTGCTGC  
 TAGAGGATGCTGTTGTGGCATTCTACTCAGGAACGGACTCCAAAGGCCTGCTGACCCTG  
 GAAGCCATACTCCTGGCTCCTTTCCCCTGAATCCCCCAACTCCTGGCACAGGCATTTCT  
 CCACCTCTCCCCCTTTGCCTTTTGTGTTGTTTGTGTTGTTGTCATGCCAACTCTGCGTGCAGC  
 CAGGTGTAATTGCCTTGAAGGATGGTTCTGAGGTGAAAGCTGTTATCGAAAGTGAAGAGA  
 TTTATCCAAATAAACATCTGTGTTT

|         | Sequence              | Tm |
|---------|-----------------------|----|
| Forward | CCACTTACCACAACCAGACGG | 60 |
| Reverse | GGGTACCTTCCCTCGCCATGG | 62 |

**IL-27**

>NM\_145636 NM\_145636 Mus musculus interleukin 27 (Il27), mRNA. 2/2007

ATGGGCCAGGTGACAGGAGACCTTGGCTGGCGGCTCAGCCTGTTGCTGCTACCCTTGCTT  
 CTGGTACAAGCTGGTTCTGGGGTTCCCAACAGACCCCTGAGCCTTCAAGAGCTGCGC

AGGGAATTCACAGTCAGCCTGTACCTTGCCAGGAAGCTGCTCTCTGAGGTTTCAGGGCTAT  
 GTCCACAGCTTTTGTGAATCTCGATTGCCAGGAGTGAACCTGGACCTCCTGCCCCCTGGGA  
 TACCATCTTCCCAATGTTTCCCTGACTTTCCAGGCATGGCATCACCTCTCTGACTCTGAG  
 AGACTCTGCTTCCTCGCTACCACACTTCGGCCCTTCCTGCCATGCTGGGAGGGCTGGGG  
 ACCCAGGGGACCTGGACCAGCTCAGAGAGGGAGCAGCTGTGGGCCATGAGGCTGGATCTC  
 CGGGACCTGCACAGGCACCTCCGCTTTCAGGTGCTGGCTGCAGGATTCAAATGTTCAAAG  
 GAGGAGGAGGACAAGGAGGAAGAGGAAGAGGAGGAAGAAGAAGAAAAGAAGCTGCCCTA  
 GGGGCTCTGGGTGGCCCCAATCAGGTGTATCCCAAGTGTCTGGCCCCAGCTGCTCTAT  
 ACCTACCAGCTCCTTCACTCCCTGGAGCTTGTCTCTCGGGCTGTTTCGGGACCTGCTG  
 CTGCTGTCCCTGCCAGGCGCCAGGCTCAGCCTGGGATTCTAA

|         | Sequence             | Tm |
|---------|----------------------|----|
| Forward | ATGAGGCTGGATCTCCGGGA | 63 |
| Reverse | GAATCCTGCAGCCAGCACC  | 60 |

#### IL-5

>NM\_010558 NM\_010558 Mus musculus interleukin 5 (Il5), mRNA. 2/2007

CGCTCTTCCCTTGTGAAGGCCAGCGCTGAAGACTTCAGAGTCATGAGAAGGATGCTTCT  
 GCACTTGAGTGTCTGACTCTCAGCTGTGTCTGGGCCACTGCCATGGAGATTCCCATGAG  
 CACAGTGGTGAAAGAGACCTTGACACAGCTGTCCGCTCACCGAGCTCTGTTGACAAGCAA  
 TGAGACGATGAGGCTTCTGTCCCTACTCATAAAAAATCACCAGCTATGCATTGGAGAAAT  
 CTTTTAGGGGCTAGACATACTGAAGAATCAAAGTGTCCGTGGGGTACTGTGAAATGCT  
 ATTCAAAACCTGTCAATTAATAAAGAAATACATTGACCGCCAAAAGAGAAGTGTGGCGA  
 GGAGAGACGGAGGACGAGGCAGTTCCTGGATTACCTGCAAGAGTTCCTTGGTGTGATGAG  
 TACAGAGTGGGCAATGGAAGGCTGAGGCTGAGCTGCTCCATGGTGCAGGACTTCACAAT  
 TTAAGTTAAATTTGTCAACAGATGCAAAAACCCACAAAAGTGTGCAAATGCAAGGGATAC  
 CATATGCTGTTTCCATTTATATTTATGTCTGTAGTCAGTTAAACCTATCTATGTCCATA  
 TATGCAAAGTGTTTAACCTTTTTTGTATACGCATAAAAAGAAATTCCTGTAGCGCAGGCTGG  
 CCTCAAACCTGGTAATGTAGCCAAGGATAACCTTGAATTTCTGATCCTCCTGCCTCCTCTT  
 CCTGAAGGCTGAGGTTACAGACATGCACCATTGCCACTAGTTCATGAAGTGTGGAGATG  
 GAACCAAGGCTTTGTGCATGTTACCAACTGAGTTATACTCCCTCCCCCTCATCCTCTTC  
 GTTGCATCAGGGTCTCAAGTATTCCAGGCTGACTTTGAACTCAGTGTGTAGCCAAGGGTG  
 ACCCTGAACTCTTGGTCCAGATGGACGCAGGAGGATCACATACCCAACCTTAGCATCCTT  
 TCTCCTAGCCCCCTTTAGATAGATGATACTTAATGACTCTCTTGTCTGAGGGATGCCACACC  
 GGGGCTTCTGCTCCTATCTAACTTCAATTTAATAACCCACTAGTCAATCTCTCCTCAACT  
 CCCTGCTACTCTCCCCAAACTCTAGTAAGCCCACTTCTATTTCTTGGGGAGAGAGAAGGT  
 TGACTTTTTCTTATGTCTATGTATGAATCAGACTGTGCCATGACTGTGCCTCTGTGCCTG  
 GAGCAGCTGGATTTTGGAAAAGAAAAGGGACATCTCCTTGCAGTGTGAATGAGAGCCAGC  
 CACATGCTGGGCCTTACTTCTCCGTGTAAGTAAAGAAAGCAAAGTAAATACCACAA  
 CCTTACTACCCCATGCCAACAGAAAGCATAAAAATGGTTGGGATGTTATTCAGGTATCAGG  
 GTCACTGGAGAAGCCTCCCCAGTTTACTCCAGGAAAAACAGATGTATGCTTTTTATTAA  
 TTCTGTAAGATGTTTATATTTATGATGGATTTCAGTAAGTTAATATTTATTACAACGT  
 ATATAATATTCTAATAAAGCAGAAGGGACAACCTC

|         | Sequence              | Tm |
|---------|-----------------------|----|
| Forward | ACCCAAGGCTTTGTGCATGTT | 60 |
| Reverse | GCAACGAAGAGGATGAGGGG  | 61 |

#### Stat6

>NM\_009284 NM\_009284 Mus musculus signal transducer and activator of  
 transcription 6 (Stat6), mRNA. 2/2007

GCCGCTCTAACGCAACACGCCCTCTGTCCGACAGGTAATTGCACTGCCCCGGTCTCACCTAA  
 CTATGCACGTAACAATCCTCACTCGGGACGAACTGGGTTGTGCACGCTGGACCTGGGCA  
 AGAGGAAACCACCCAGGCCAGGTCCGGGCTCAAGCCCGCCGATTGTCAGAAGAGAAC  
 CGCTGGACAGACCTACAGACCCATGGGGCTTGGTAGTGCCCTCTGAGAGAGGGAGAAGAT  
 AGCAGCGGGGCTGCCGAGGCACCCTGTATATCCAGATCATGTCTCTGTGGGGCCTAATT  
 TCCAAGATGTCCTCCAGAAAACCTGCAACGGCTCTATGTTGACTTTCCACAACGCCTACGG  
 CATCTCCTGGCTGACTGGCTGGAGAGCCAGCCCTGGGAGTTTCCTGGTTCGGTTTCAGATGCT  
 TTCTGTTACAACATGGCCAGTGCCCTACTTTCTGCCACCGTCCAGCGTCTTCAGGCCACT  
 GCTGGAGAGCAGGGGAAGGGAAAACAGCATCTTGCCTGCACATCAGCACCTTGGAGAGCATC

TATCAGAGGGACCCCTGAAGCTGGTGGCCACCATCAGACAAATACTTCAAGGGGAGAAA  
AAAGCTGTTATAGAAGAGTTCGCCACCTGCCAGGGCCCTTCCATCGGAAGCAGGAAGAA  
CTCAAGTTTACTACACCCCTCGGAAGGCTTCACCATCGAGTAAGGGAGACCCGGCTTCTC  
CGAGAATCTCTACACCTAGGGCCTAAGACTGGACAAGTGTCTCTGCAGAATTTGATAGAC  
CCTCCTCTCAATGGTCTGGTCCAAGTGAGGACCTGCCACCATACTCCAGGGGACTGTG  
GGGGACCTGGAGACCACCCAGCCCCCTGGTTCTGTTAAGGATTCAGATTTGGAAGCGGCAG  
CAACAGCTGGCAGGGAATGGCACACCCTTTGAGGAGAGCCTAGCAGGGCTCCAGGAGAGG  
TGTGAAAGCCTGGTGGAAATTTATTCCAGCTCCACCAGGAGATTGGGGCAGCCAGTGGG  
GAACTGGAACCCAAGACCCGGGCATCGCTGATAAGCCGTCTGGATGAAGTCTTGCGAACC  
CTTGTGACCAGCTCTTTCTGGTGGAGAAGCAGCCCCCAGGTTCTGAAGACACAGACT  
AAGTTCCAGGCTGGGGTTCGATTCTGCTGGGTCTGCAGTTTCTAGGGACCTCAACCAAG  
CCTCCAATGGTCAGAGCTGACATGGTGCAGAGAAAACAGGCCAGAGAACTAAGTCTGTCC  
CAGGGGCCCGGGACTGGAGTGGAGAGCACAGGAGAGATCATGAACAACACGGTGGCCCTG  
GAGAACAGCATTCCAGCAACTGCTGCTCCGCCCTGTTCAAGAACCTGCTCCTGAAGAAA  
ATAAAGCGCTGTGAGCGGAAGGGCACAGAGTCTGTACCGAGGAGAAAGTGTGCTGTGCTC  
TTCTCCACGAGCTTCACATTGGGCCCAACAACTTCTCATCCAGCTTCAGGCCCTGTCT  
CTGTCTTGGTGGTCATCGTGCATGGTAACCAAGACAACAACGCCAAAGCTACCATCCTA  
TGGGACAATGCCTTCTCTGAGATGGACCGAGTGCCCTTTGTGGTGGGTGAGCGAGTGCC  
TGGGAGAAGATGTGTGAAACCTAAACCTCAAGTTTATGGTTGAGGTGGGGACCAGCCGG  
GGACTGCTTCCAGAGCACTTCTGTTCTCGCCAGAAGATCTTCAACGACAACAGCCTC  
AGTGTGGAGGCCCTTTCAGCACCGCTGTGTGCTCCTGGTCCAGTTCATAAAGGAGATCCTG  
CTGGGCCGAGGCTTCACATTTTGGCAGTGGTTTGTGGTGTCTGGACCTCACCAAACGC  
TGTCTCCGGAGCTACTGGTCAGATCGGCTGATCATTGGCTTTATTAGTAAGCAATATGTC  
ACTAGCCTTCTCCTCAATGAGCCAGATGGGACCTTCTCCTCCGCTTTAGCGACTCTGAG  
ATCGGGGGCATCACCATTGCACACGTTCATCCGGGGTCAGGATGGCTCCTCACAGATAGAG  
AACATCCAGCCATTTTCTGCCAAAGACCTGTCCATTTCGCTCACTGGGGGACCCGGATCCGG  
GATCTTGTCTCAGTTAAAAAACCTCTACCCCAAGAAACCCAAAGATGAGGCTTTCCGGAGT  
CACTATAAGCCCCGAACAGATGGGGAAGGACGGGAGGGGTTATGTCTCTACTACTATCAAG  
ATGACTTGTGAAAGGGACCAGCCCCCTTCTACTCCAGAGCCCCAGATGCCTGCCATGGTG  
CCACCTTATGATCTTGGAAATGGCCCCCTGATGCTTCCATGCAACTCAGCTCAGATATGGGG  
TATCCTCCACAGTCCATCCACTCATTTCAGAGCCTAGAAGAGTCCATGAGTGTACTGCCA  
TCTTTTTCAGGAGCCTCACCTGCAAATGCCCCCAACATGAGCCAGATAACCATGCCCTTT  
GACCAGCCTCACCCCCAGGGTCTGCTGCAGTGCCAGTCCCAGGAACATGCTGTGTCCAGC  
CCTGAACCCATGCTTTGGTCAGATGTGACTATGGTAGAGGACAGTTGCCTAACTCAGCCT  
GTGGGAGGTTTCCCCAAGGCACCTGGGTGAGTGAAGACATGTACCCTCCCCTGCTGCCT  
CCCCTGAACAGGACCTCACCAAGCTTCTCCTGGAGAACCAAGGGGAGGGAGGGTCC  
TTAGGAAGCCAGCCCCCTCCTGAAACCATCTCCTTATGGGCAATCAGGGATCTCACTGTCC  
CACCTGGACCTAAGGACCAACCCCAGCTGGTGCATCCAGCTGGAGAAGCCAGAAAACAAA  
GCCTCTTCTGTCTCTATGGACCAGCTCTGGACACCTGCTCATGCAGGTGCCTTCCGTCTC  
AACTGTTCTTGGTTAAGAGAAAAGAACTGGCTGGGAGACCATGTGGTGTATGGAAGTGC  
TGTGCTCTGTCTACCTGCCATATCAGGGCCCCCTTTTCCAGCACTGGGTGCAAAGGGA  
TGAGTGGGGTGTAAATGCTCGAATGTGATACAACCTGTATCACAAACACACACACACACA  
TACACACACACCAGAACTGTGTTGAGCCAGGGCCTGGGACTCAACATACAGAAAACATAGA  
GACATTGTGCCCAAAGACAGAGGACATATAGCCCTAGGGCATTGAAGCTGGGCTCAGTGA  
CTCTGGGAGGGAGAAAAAGGAAAAAGTGGGTAT

|         | Sequence              | Tm |
|---------|-----------------------|----|
| Forward | CAGGTAATTGCACTGCCCGGT | 63 |
| Reverse | CAGTTCGTCCCGAGTGAGGAT | 60 |

IL-22

>NM\_016971 NM\_016971 Mus musculus interleukin 22 (Il22), mRNA. 2/2007  
CCTAAACAGGCTCTCCTCTCACTTATCAACTGTTGACACTTGTGCGATCTCTGATGGCTG  
TCCTGCAGAAATCTATGAGTFTTTCCTTATGGGGACTTTGGCCGCCAGCTGCCTGCTTC  
TCATTGCCCTGTGGGCCAGGAGGCAAATGCGCTGCCCGTCAACACCCGGTGCAAGCTTG  
AGGTGTCCAACCTCCAGCAGCCGTACATCGTCAACCCGACCTTTATGCTGGCCAAGGAGG  
CCAGCCTTGCAGATAACAACACAGACGTCCGGCTCATCGGGGAGAACTGTTCCGAGGAG  
TCAGTGCTAAAGATCAGTGCTACCTGATGAAGCAGGTGCTCAACTTCACCCTGGAAGACG  
TTCTGCTCCCCAGTCAGACAGGTTCCAGCCCTACATGCAGGAGGTGGTACCTTTCTCTGA  
CCAAACTCAGCAATCAGCTCAGCTCCTGTACATCAGCGGTGACGACCAGAACATCCAGA

AGAATGTCAGAAGGCTGAAGGAGACAGTGAAAAAGCTTGGAGAGAGTGGAGAGATCAAGG  
 CGATTGGGGAAGTGGACCTGCTGTTTATGTCTCTGAGAAATGCTTGGCTCTGAGCGAGAA  
 GAAGCTAGAAAACGAAGAACTGCTCCTTCTGCCTTCTAAAAAGAACAATAAGATCCCTG  
 AATGGACTTTTTTACTAAAGGAAAAGTGAGAAAGCTAACGTCCATCATCATTAGAAGATTTT  
 ACATGAAACCTGGCTCAGTTGAAAAAGAAAATAGTGTCAAGTTGTCCATGAGACCAGAGG  
 TAGACTTGATAACCACAAAAGATTCATTGACAATATTTTATTGTCACTGATGATACAACAG  
 AAAAAATAATGTACTTTAAAAAATTGTTTGAAGGAGGTTACCTCTCATTCTTTAGAAAA  
 AAAGCTTATGTAACCTTCATTTCCATATCCAATATTTTATATATGTAAGTTTATTTATTAT  
 AAGTATACATTTTATTTATGTGAGTTTATTAATATGGATTTATTTATAGAAACATTATCT  
 GCTATTGATATTTAGTATAAGGCAAATAATATTTATGACAATAACTATGGAACAAGATA  
 TCTTAGGCTTTAATAAACACATGGATATCATAAAAAAAAAA

|         | Sequence             | Tm |
|---------|----------------------|----|
| Forward | CTGCCCGTCAACACCCG    | 61 |
| Reverse | ACGATGTACGGCTGCTGGAA | 60 |

TGF-beta

>NM\_011577 NM\_011577 Mus musculus transforming growth factor, beta 1  
 (Tgfb1), mRNA. 2/2007

CGCCCGCCGCGCCGCTTCGCGCCCCAGGCCGTCCCCCTCCTCCTCCCGCCGCGGATCC  
 TCCAGACAGCCAGGCCCGCCGCGGGCAGGGGGACGCCCTTCGGGGCACCCCGGCT  
 CTGAGCCGCACTCGGAGTCGGCCTCCGCTGGGAGCCGGCAAAGGAGCAGCCGAGGAGCCG  
 TCCGAGGCCCCAGAGTCTGAGACCAGCCCGCCGCGCAGGGAGGAGGGGGAGGAGGAGTGG  
 GAGGAGGGACGAGCTGGTTGAGAGAAGAGGAAAAAGTTTTGAGACTTTTCCGCTGCTAC  
 TGCAAGTCAGAGACGTGGGGACTTCTTGGCACTGCGCTGTCTCGCAAGGAGGCAGGACCT  
 GAGGACTCCAGACAGCCCTGCTCACCGTCGTGGACACTCGATCGCTACCCGGCGTTCCCTC  
 AGACGCCCTTATTCGGACCAGCCCTCGGGAGCCACAAACCCCGCTCCCGCGAAGACTT  
 CACCCCAAAGCTGGGGCGCACCCCTTGCACGCCGCCCTCCCCCAGCCTGCCTCTTGAGT  
 CCCTCGCATCCCAGGACCTCTCTCCCCGAGAGGCAGATCTCCCTCGGACCTGCTGGCA  
 GTAGCTCCCTATTTAAGAACACCCACTTTTGGATCTCAGAGAGCGCTCATCTCGATTTT  
 TACCCTGGTGGTATACTGAGACACCTTGGTGTGAGAGCCTCACCGGACTCCTGCTGCTT  
 TCTCCCTCAACCTCAAATTATTCAGGACTATCACCTACCTTTCTTGGGAGACCCACCC  
 CACAAGCCCTGAGGGGCGGGCCCTCCGCATCCCACCTTTGCCGAGGGTTCCCGCTCTCC  
 GAAGTCCCTGGGGCGCCGCTCCCCATGCCGCCCTCGGGCTCGGGCTACTGCCGCTT  
 CTGCTCCCACTCCCGTGGCTTCTAGTGCTGACGCCCGGGAGGCCAGCCGCGGGACTCTCC  
 ACCTGCAAGACCATCGACATGGAGCTGGTGAAACGGAAGCGCATCGAAGCCATCCGTGGC  
 CAGATCCTGTCCAAACTAAGGCTCGCCAGTCCCCCAAGCCAGGGGGAGGTACCGCCCGGC  
 CCGCTGCCCGAGGCGGTGCTCGCTTTGTACAACAGCACCCCGGACCGGGTGGCAGGCGAG  
 AGCGCCGACCCAGAGCCGGAGCCCGAAGCGGACTACTATGCTAAAGAGGTCAACCGCGTG  
 CTAATGGTGGACCGCAACAACGCCATCTATGAGAAAACCAAAGACATCTCACACAGTATA  
 TATATGTTCTTCAATACGTGAGACATTCGGGAAGCAGTGCCCGAACCCCATTTGCTGTCC  
 CGTGACAGACTGCGCTTGCAGAGATTAATAATCAAGTGTGGAGCAACATGTGGAACCTCTAC  
 CAGAAATATAGCAACAATTCCTGGCGTTACCTTGGTAACCGGCTGCTGACCCCACTGAT  
 ACGCCTGAGTGGCTGTCTTTGACGTCACTGGAGTTGTACGGCAGTGGCTGAACCAAGGA  
 GACGGAATACAGGGCTTTTCGATTCAGCGCTCACTGCTCTTGTGACAGCAAAGATAACAAA  
 CTCCACGTGGAATCAACGGGATCAGCCCCAAACGTCCGGGGCGACCTGGGCACCATCCAT  
 GACATGAACCGGCCCTTCTGCTCCTCATGGCCACCCCTTGGAAAGGGCCAGCACCTG  
 CACAGCTCACGGCACCGGAGAGCCCTGGATAACCAACTATTGCTTCAGCTCCACAGAGAAG  
 AACTGCTGTGTGCGGCAGCTGTACATTGACTTTAGGAAGGACCTGGGTTGGAAGTGGATC  
 CACGAGCCCAAGGGCTACCATGCCAACTTCTGTCTGGGACCCTGCCCTATATTTGGAGC  
 CTGGACACAGTACAGCAAGGTCCTTGCCTCTACAACCAACACAACCCGGGCGCTTCG  
 CGCTCACCGTCTGCGTCCCGCAGGCTTTGGAGCCACTGCCCATCGTCTACTACGTGGGT  
 CGCAAGCCCAAGGTGGAGCAGTTGTCCAACATGATTGTGCGCTCCTGCAAGTGCAGCTGA  
 AGCCCCGCCCCGCCCCGCCCTCCCCGGCAGGCCCGGCCCGCCCCGCCCCGCCCCG

|         | Sequence            | Tm |
|---------|---------------------|----|
| Forward | CGCGGGACTCTCCACCTG  | 61 |
| Reverse | GATGCGCTTCCGTTTCACC | 60 |

Tbx21 (TBET)

>NM\_019507 NM\_019507 Mus musculus T-box 21 (Tbx21), mRNA. 3/2007

GCGGCCGCGTTCGACCGCGCTCAGGAGCCAAGCGTCCCAGCTCCCAGTGAAGTT  
 TCATTGGTCTTCGGACGCCGCCCCGTCGCCCCAGCCCTAAGGACCCTCGGGTCTCTTCG  
 ACGGCTGTGGAAGGCGCCAGCCCGCTCGGATGGGCATCGTGGAGCCGGGCTGCGGAG  
 ACATGCTGACCGGCACCGAGCCGATGCCGAGTGACGAGGGCCGGGGCCCGGAGCGGACC  
 AACAGCATCGTTTCTTCTATCCCGAGCCGGGCGCACAGGACCCGACCGATCGCCGCGCAG  
 GTAGCAGCCTGGGGACGCCCTACTCTGGGGGCGCCCTGGTGCCTGCCGCGCCGGGTGCT  
 TCCTTGGATCCTTCGCCTACCCGCCCCGGGCTCAGGTGGCTGGCTTTCCCGGGCCTGGCG  
 AGTTCTTCCCGCCCGCCGCGGGTGCAGGAGGGCTACCCGCCCCGTTGGATGGCTACCCCTGCCC  
 CTGACCCGCGCGCGGGGCTCTACCCAGGGCCGCGGAGGACTACGCATTGCCCCGCGGGGT  
 TGGAGGTGTCTGGGAAGCTGAGAGTCGCGCTCAGCAACCACCTGTTGTGGTCCAAGTTCA  
 ACCAGCACCAGACAGAGATGATCATCACTAAGCAAGGACGGCGAATGTTCCCATTCCTGT  
 CCTTCACCGTGGCTGGGCTGGAGCCCACAAGCCATTACAGGATGTTTGTGGATGTGGTCT  
 TGGTGGACCAGCACCCTGGCGGTACCAGAGCGGCAAGTGGGTGCAGTGTGGAAAGGCAG  
 AAGGCAGCATGCCAGGGAACCGCTTATATGTCCACCCAGACTCCCCAACACCGGAGCCC  
 ACTGGATGCGCCAGGAAGTTTCATTTGGGAAGCTAAAGCTCACCAACAACAAGGGGGCTT  
 CCAACAATGTGACCCAGATGATCGTCTGCAGTCTCTCCACAAGTACCAGCCCCGGCTGC  
 ACATCGTGGAGGTGAATGATGGAGAGCCAGAGGCTGCCTGCAGTGTCTTAACACACACG  
 TCTTTACTTTTCCAAGAGACCCAGTTTCATTGCAGTACTGCCTACCAGAACGCAGAGATCA  
 CTCAGCTGAAAATCGACAACAACCCCTTTGCCAAAGGATTCCGGGAGAACTTTGAGTCCA  
 TGTACGCATCTGTTGATACGAGTGTCCCCTCGCCACCTGGACCCAACTGTCAACTGCTTG  
 GGGGAGACCCCTTCTCACCTCTTCTATCCAACCAGTATCCTGTTCCAGCCGTTTCTACC  
 CCGACCTTCCAGGCCAGCCCAAGGATATGATCTCACAGCCTTACTGGCTGGGGACACCTC  
 GGGAAACACAGTTATGAAGCGGAGTTCGAGCTGTGAGCATGAAGCCACACTCCTACCT  
 CTGCCCCGGGGCCACTGTGCCCTACTACCGGGGCCAAGACGTCCTGGCGCTGGAGCTG  
 GTTGGCCCGTGGCCCTCAATACCCGCCAAGATGAGCCCAGCTGGCTGGTTCGGGCCA  
 TGCGAACTCTGCCATGGACCCGGGCTGGGATCCTCAGAGGAACAGGGCTCCTCCCCCT  
 CGCTGTGGCCCTGAGGTCACCTCCCTCCAGCCGGAGTCCAGCGACTCAGGACTAGGCGAAG  
 GAGACTAAGAGAGGAGGAGATATCCCCCTATCCTTCCAGTGGCGACAGCTCCTCTCCCG  
 CTGGGGCCCTTCTCCTTTTGATAAGGAAACCGAAGGCCAGTTTTATAATTATTTTCCCA  
 ACTGAGAAAATGCCGCTGAATTGGAAGGTGCCCACTAAGTAAAGAAAACAGACGCGGGGCT  
 GAGAGCCCCGAGCTCTTCCCATCCCTTCCCTGTATAGTGATTGGTTGGAGAGGAAGCGG  
 GGCAAGAAGGATTCTGGGGTTTACTTCTTGTTCCTGGCCACAAGGAAATACGACAGGA  
 GTGTCCCTGCCCTTTCTCTGCCGAACTACAGTACGAACTGGTGCTGCTTCTGACC  
 CCATGGTTCCATGGAGAACGGAGAATGGACTCCAGAGAGTTTTTGGACCCAGAGGGACTTC  
 ATGGCTTTCTGCGAGGTGGAGGGGTGCGGGTGGGGAGTCCAGGAGAGCTGCTCTCTTCCC  
 CTGTCCAGTACGTAACCTTTCAACTGTTGGTCTGACACCTGTGTTAATCTCTGACCTGAAA  
 GTGAAGATACACGCATTTTACAACAGCCAGCCAAACAGAGAAGACTCAGGTGACTGCGG  
 GCGGACTGGGCCACCTGCGAGGAGACAAGAGAGGGTGGGTGCAGAGGAAGGGTTTGAAGG  
 GTGCACATTTACCAGGCGAGGTCACTTTGAACCGGTGTGTACACACACGGGTGTCTCTT  
 TTTTATTTCTTCCGGAGGGGGGAGGCTATTTATTGTAGAGAGTGGTGTCTGGATGTATTT  
 CTTCTGTTTTGCATCACTTTCTGGAAATAAACATGGACCTGGTAAAAAAAAAAAAAAAAAA  
 AAAAAAAAAAAAAAAAAAAAAA

|         | Sequence           | Tm |
|---------|--------------------|----|
| Forward | TGGCGGTACCAGAGCGG  | 60 |
| Reverse | AAGCGGTTCCCTGGCATG | 61 |

Gata-3

>NM\_008091 NM\_008091 Mus musculus GATA binding protein 3 (Gata3), mRNA. 2/2007

TTTTCTTTTCTCCCTAAACCCTCCTTTTTTGCTCTCCTTTTTCTATACCCTTAACTGCAAAC  
 AAACCATTAAACGACCCCTCTCCTGGGCCTCCGACGGCAGGAGTCCGCGGACCTCCCAGG  
 CCGACAGCCCTCCCTCTACCCGCGAGGGTTCGGGGCCGGGCGAGAGGGCGCGAGCACAGC  
 CGAGGACATGGAGGTGACTGCGGACCAGCCGCTGGGTGAGCCACCATCACCCGCGGT  
 CCTCAACGGTCAGCACCCAGACACGCACCACCCGGGCTCGGCCATTTCGTACATGGAAGC  
 TCAGTATCCGCTGACGGAAGAGGTGGACGTAATTTTAAACATCGATGGTCAAGGCAACCA  
 CGTCCCGTCTACTACGAAACTCCGTCAGGGCTACGGTGCAGAGGTATCCTCCGACCCA



CCACGGGAGCCAGGTATGCCGCCCGCCTCTGCTGCACGGATCTCTGCCCTGGCTGGATGG  
CGGCAAAGCCCTGAGCAGCCACCACACCCGCTCGCCCTGGAACCTCAGCCCCCTTCTCCAA  
GACGTCCATCCACCACGGCTCTCCGGGGCCTCTGTCCGTTTACCCTCCGGCTTCATCCTC  
TTCTCTGGCGGCCGGCCACTCCAGTCTCATCTCTTCACCTTCCCGCCACCCCGCCGAA  
AGACGTCTCCCCAGACCCGTCGCTGTCCACCCCGGGATCCGCCGGGTTCGGCCAGGCAAGA  
TGAGAAAAGAGTGCCTCAAGTATCAGGTGCAGCTGCCAGATAGCATGAAGCTGGAGACGTC  
TCACTCTCGAGGCAGCATGACCACCCTGGGTGGGGCCTCATCCTCAGCCCACCACCCCAT  
TACCACCTATCCGCCCTATGTGCCCGAGTACAGCTCTGGACTCTTCCCACCAGCAGCCT  
GCTGGGAGGATCCCCTACCGGGTTCGGATGTAAGTTCGAGGCCCAAGGCACGATCCAGCAC  
AGAAGGCAGGGAGTGTGTGAAGTGCAGGGCAACCTCTACCCCACTGTGGCGGCGAGATGG  
TACCGGGCACTACCTTTGCAATGCCTGCGGACTCTACCATAAAAATGAATGGGCAGAACCG  
GCCCTTATCAAGCCCAAGCGAAGGCTGTCCGGCAGCAAGGAGAGCAGGGACATCCTGCGC  
GAACTGTGAGACCACCACCACCCTCTGGAGGAGGAACGCTAATGGGGACCCGGTCTG  
CAATGCCTGTGGGCTGTACTACAAGCTTTCATAAATATTAACAGACCCCTGACTATGAAGAA  
AGAAGGCATCCAGACCCGAAACCGAAAGATGTCTAGCAAATCGAAAAAGTGCAAAAAAGGT  
GCATGACGCGCTGGAGGACTTCCCAAGAGCAGCTCCTTCAACCCGGCCGCTCTCTCCAG  
ACACATGTCATCCCTGAGCCACATCTCTCCCTTTCAGCCACTCCAGCCACATGCTGACCAC  
ACCGACGCCCATGCATCCGCCCTCCGGCCTCTCCTTTCGGACCTCACCACCCTTCCAGCAT  
GGTCACCGCCATGGGTTAGAGAGGCAGAGCCCTGCTCCACATGCGTGAGGAGTCTCCAAG  
TGTGCGAAGAGTTCTCCGACCCCTTCTACTTTCGCTTTTTTCGAGGAGCAGTATCATGAA  
GCCCCGAAAGCGACAGATCTGTGTTTTTGAAGGCAGAAAGCAAAAATGTTTGCTTCTTTTTT  
CAAAGGAGCTCGAGGTGGTGTCTGCATTCCAACCACTGAATCCGGATCCCATTTGTGAAT  
AAGCCATTCAGACTCATATTTCCCTATTTAACAGGGTCTCTAGTGCTGTGAAAAAATATT  
GCTGAACATTCATATAAATTTATATTGTAAGAAAATACTGTACATTTGAGGAAGACTTTAT  
TGTACCTGGATAGCTGTAAGAAAAGGCATGAAGGACGCCAAGAGTTTTAAGGAATATAGGG  
GGATTAAGTATGGAGATACAGAAGAAAACCAAGTCTGATGTCCAAATGGGCACACTG  
TCAGTTTTGTTTTCCCTTCAGTTGTTTTGATGCATTTAAAAAAAAAAAAAAAAAGAAAGAAAAG  
AAAAAAAAAGGGGGGGGGGAGAAAAAAAAATAATTAAAAAAAAAAAAAAAAAAGAAAAG  
AAAGAAAAATCTAAGAAAAAAAAAAAAAAAAAGTTGTAGGCAAATCATTTGTTCCAGGCTGT  
GAGCCTGTGCAAAAGAGATTTAGATCTGGGCAATGGGTGTGTGATCTCACCCACTGAAG  
ATCTGAGAATGTGATGGCTAGGCCTACATGCTCTGTGAATCAGTCCCTGTAATTGTTGTT  
TGTATGTATAATTCAGAAGCACCAAAATAAGAAAAGATGTAGATTTATTTTCATCATATTA  
TACAGACTGAATTTGTTGTATAAAATTTATTTACTGCTAGTGTAGGAACTGCTTTTTTTTTT  
TTTTTTGGTTTTAATGTTTTTTTTTTTTTTTTGTTTTTTTTTTTTTTTTTTTTCTTTCTCTG  
GATTTTTGGTTGAATAAACTAGATTGCTTTTCAGTTGACTTAAGGTGGATGTAATCTGGAG  
GGTTTTATTTTTCTTTTATTATTATTTTTGATGGTATTTATTAATAGCTTCTATGGGCC  
CGGCGGTACCTGTCTTTTTTCGTCACCTTTCTTGCAGCCTAAACTATGAAGGTAGCAGCGT  
ACCAGCTACCAACATGCATGTGAGAGACCCGGCCACTCACAGGCCTGGTCTGAGAGCCA  
CCTGGCTGACTGTTAGCCCTGTGTGTTCTGTATTAGTGATCACTGCCTTTAAACAGTCT  
GTTGGAATAATACTATAAAAAATAATAATAAAGTTAAAAATATTTTAAAAACAAAAAAAAAAAA  
AAAAAAAAAAAAAAAAAAAAAAAAAAAAAAAAAAAA

|         | Sequence            | Tm |
|---------|---------------------|----|
| Forward | TGAACTGCGGGGCAACCTC | 63 |
| Reverse | TGCAAAGGTAGTGCCCGTA | 60 |

**CXCL9**

>NM\_008599 NM\_008599 Mus musculus chemokine (C-X-C motif) ligand 9 (Cxcl9), mRNA. 1/2007

GAAAGACATTCTCGGACTTCACTCCAACACAGTGACTCAATAGAACTCAGCTCTGCCATG  
AAGTCCGCTGTTCTTTCTCTTTGGGCATCATCTTCTGGAGCAGTGTGGAGTTCGAGGA  
ACCCTAGTGATAAGGAATGCACGATGCTCCTGCATCAGCACCAGCCGAGGCACGATCCAC  
TACAAAATCCCTCAAAGACCTCAAACAGTTTGCCTCAAGCCCAATTGCAACAAAACCTGAA  
ATCATTGCTACACTGAAGAACGGAGATCAAACCTGCCTAGATCCGGACTCGGCAAAATGTG  
AAGAAGCTGATGAAAGAATGGGAAAAAGAAAGATCAGCCAAAAAGAAAAAGCAAAAAGAGGGG  
AAAAAATCAAAAAGAAATGAAAAACAGAAAAACCAAAAACCCCAAAAGTCGTGTCGT  
TCAAGGAAGACTACATAAGAGACCATTACTTTACCAACAAGCACCCTGAATCTTAATGGG  
TTTTAGATTGTAAGGAAAGCCTTCCCTGGCAGAGCAGCCTTTAATAACATAGGCTTTTTAA  
TACATTAACCTCAACTACAAAACATAAAGTGTAAATTTGAAATTAATACTAACTTTAGGAA

GTTAATTGCAAAACTCCAATAGTAACAATTGCTAGAGGCAAAAACCTCTGTGTTCTACACA  
 GCCAACAAAATTTTCATCACGCCCTTGAGCCTAGTCGTGATAACATCAGATCTGGGCAAGT  
 GTCCCTTTTCCTTCATAGCTATCCAATGCACAACAGCTGTCTGGCTTCCAGAGCCACACAT  
 TTGGCAGCCTCCGAAGACTTCTGAGGCTCACGTCACCAAATCCCAGGCCTGTCTGTTTGC  
 TGGTGAGCTAGATAGACCTCACCAAGCTGGAGAGGCCCTCGGCCAGCTGCATTTGGGTCA  
 GCCTAGAGCCCCTGCACACATTTGTGTCTCAGAGATGGTGCTAATGGTTTTGGGGTTCTAC  
 AGTGAGACCACCAGAGTTGGCCTTCCAGAACCTCCCACGTAGCTTTTCGAGACCATGGGAT  
 TTCATTATTAACCTTGATCCCATCTTCCAGAGCTTATTCTAAGTTTTGCCTCTTCAATAAAAC  
 TCTCCTAGAAGGTTGTGGCTGTAGCTTAGTGGCAGAACACTTGGTGTTCAGGGACCAGG  
 TCCTTCACTAACAGTGCAAAAACCTTAACCAATTTAAAGAACATTTTTCTGGCTACTCAAAT  
 TCTCTTAAATTTATTCTGTCTTCCAAAGTAAACACTTCGCTGCTATCTAATTGGATTTGT  
 TTGTTTTGTTTTGTTTTACTTTTTTCCAACGAGACGGGTTTTTTAAGAGTAGGGACCACAGACT  
 ATTCCCCTAAATCTTCCACAGTGCCTACAAAAAATTTGGTTTTGAATAAATTTCCCTAATTGT  
 ATGTGTGAGAGGTAGAAAAGGCTGTTACACACCAGGCATTGGCCAATCCCCGGCTGCTCCA  
 AATTGCCTAACTAACCTTTGGCCTCCTTGCTTGCTTACCACCTTTTTTTTTTTTTTTTTTTT  
 AAAGAAAGTTTTATATCTGGCTGTCTAAAACCTCTCAAAGTAGACAAGGCTGGTCTCAAA  
 TTCATACATATCTGTATTCTACTGCCTCCTGAATGCTGGGGTTAAAGGTGTGTGCTACTA  
 CACCTGATTGCCTGCCTTCTTCTTCTTCCCTCCCTCCCTTCTTCTTCTTCTTCTTCC  
 TTCTTCTTCTTCTTCTTCTTCTTCTTCTTCTTCTTCTTCTTCTTCTTCTTCTTCTTCC  
 TTAGCATCTTTCAGCGCACAGAGCCAGACAGGGTGAAAAAGAGCCTTACCTTGTGACAGGA  
 GGCTCGTGTCTTTAACAACAGGAATCACATGTTCAAGACATTTGCGGATATTTGGGACT  
 GCTCAGGAAAAATTACACAGGCCATCTAGAAAACATAAGCTTACATGGAAGACAGGTTTGA  
 CTGATTGGCAAATACTAGATCTTTCTCACTCAAAAACAAAATTCCTCTAATATCATTCTT  
 GATCAGGACAAGCTCCCTAGGAGTCAACAAAAGAGCTGCCAAATCCTTTAGCAAGTTTAT  
 CTTAGGTGAATATGAATTTCTTGGCCACCTTCCCTCCCTCATTGCAGAAATCCCAGTGTA  
 TGATTGTATGGATTGCCACATCAGGCTAGGAGTGGTGAAATGGAAAGATCAGGGCTGGAG  
 AGGGAGCCAGAGTTCCATTCCCAGCACCCACCCACCGTGTGCGTGAGCCTTGTGGCCAC  
 CTGTGACTCCAGCTCCAGGGAACCCATTTCTCTTCTTGGCCTCTGCAAGCATTGCACAG  
 GTGTACACAGGCCCCCATGACATACACCCATAATCTCAGACGGCAAATAAAAATCTTTTAC  
 AGAGATATTTTTAAAGGAATTAAGAGCTACAGGAAGCAGTAAATTTCTGCGAGTGGAAGTG  
 TGGACAGGGCCAAGTTAGCCTGTGTGGGAGCTGGAAACTGCTCTAGAGAGGAGGTCTGAT  
 GAATTAGATAGAAAAGAATGTCTCTGGGCAGAAAGTTCCGTCTTGAGCATGCTTTTTTCTCA  
 AATACTGCCATTCCTGGCGCTGCATGCAGGTGGTTTTTGTGCTGCTGGTGGGACTCCCAT  
 CCAAACAACATTGCACAGTCAAAACGTTGTCCACCTCCCTTCGGTAATTTACTTTG

|         | Sequence                 | Tm |
|---------|--------------------------|----|
| Forward | AGCCTAGAGCCCCTGCACAC     | 60 |
| Reverse | TCTCCACTGTAGAACCCCAAAACC | 61 |

**CXCL10**

>NM\_021274 NM\_021274 Mus musculus chemokine (C-X-C motif) ligand 10 (Cxcl10), mRNA. 1/2007

CATCCCAGCAACCTTCCGGAAGCCTCCCCATCAGCACCATGAACCCAAGTGTGCCGT  
 CATTTTCTGCCTCATCCTGCTGGGTCTGAGTGGGACTCAAGGGATCCCTCTCGCAAGGAC  
 GGTCCGCTGCAACTGCATCCATATCGATGACGGGCCAGTGAGAATGAGGGCCATAGGGAA  
 GCTTGAAATCATCCCTGCGAGCCTATCCTGCCACCGTGTGAGATCATTGCCACGATGAA  
 AAAGAATGATGAGCAGAGATGTCTGAATCCGGAATCTAAGACCATCAAGAATTTAATGAA  
 AGCGTTTAGCCAAAAAAGGTCTAAAAGGGCTCCTTAACTGGAGTGAAGCCACGCACACAC  
 CCCGGTGTGCGATGGATGGACAGCAGAGAGCCTCTCTCCATCACTCCCCTTTACCCAGT  
 GGATGGCTAGTCCTAATTGCCCTTGGTCTTCTGAAAGGTGACCAGCCGTGGTCCATCAG  
 CTGCTACTCCTCCTGCAGGATGATGGTCAAGCCATGGTCTGAGACAAAAGTAACTGCCG  
 AAGCAAGAATTTTAAAGGGCTGGTCTGAGTCCCTCGCTCAAGTGGCTGGGATGGCTGTCC  
 TAGCTCTGTACTGTAAGCTATGTGGAGGTGCGACGCCCTTACCATGTGCCATGCCAGG  
 CTGCTCCCCACACCCTCCTTGTCTCCCTAGCTCAGGCTCGTCAGTTCTAAGTTTACCTG  
 AGCTCTTTTATTTTCCAGATGTAAGACTACAAATTTAAGTTTTGTAAGCACGAACTTAACCAC  
 CATCTTCCCAAGGGTTATCAAGATACTCAGAGGAACCTGAAAATGTATGTGTAATACT  
 ATTTAATGAACGACTGTACAAAGTAGAATTCCTAATGTATTTTTTGTATGCTTTGCATTG  
 TATATGGAAGAACTTGTGTATCAAGTATGTATCAATGGGTAGTTAAAGTTTTATTTTTAA  
 AACCGTCCAATACCTTTTTGTATTATGTAACATTCAAAAGACAATGTACTGTATTGAAAGT

AGTAAGAGACCCAAAATGTAATAAAGTAATAATAACTGACATG

|         | Sequence             | Tm |
|---------|----------------------|----|
| Forward | CTGAAAGGTGACCAGCCGTG | 60 |
| Reverse | GGCTTGACCATCATCCTGCA | 61 |

**CXCL11**

>NM\_019494 NM\_019494 Mus musculus chemokine (C-X-C motif) ligand 11 (Cxcl11), mRNA. 2/2007

GCCGTTGCTCTCTGCAAAGAGAGATCTCCAAAGCCCAGGCAGAGAGCTGCAGCGGCTGCT  
 GAGATGAACAGGAAGGTACACAGCCATAGCCCTGGCTGCGATCATCTGGGCCACAGCTGCT  
 CAAGGCTTCCCTTATGTTCAAACAGGGGCGCTGTCTTTGCATCGGCCCCGGGATGAAAGCC  
 GTCAAATGGCAGAGATCGAGAAAGCTTCTGTAATTTACCCGAGTAACGGCTGCGACAAA  
 GTTGAAGTGATTGTTACTATGAAGGCTCATAAACGACAAAGGTGCCTGGACCCCAGATCC  
 AAGCAAGCTCGCCTCATAATGCAGGCAATAGAAAAAAGAATTTTTTAAGGCGTCAAAC  
 ATGTGACATCCTGGGAACGTCTGACTGTGAGCCCTCCAATAAGAAGTCTGTGCCAGGAAC  
 CTGACCCTCTGCTGTCTTGGACATGCAGCCACGTATTACCAGGCTGCAGAAGCTTTCTAG  
 AAGGTCCGATACATCTAAACTGTTCTACTTGGCTATGAAAAATATTTGTCTCTAAAAGTC  
 ACGTGCACACTCCACGCTACCTTCTGTGGTTACAGTGGATGCATTGTTACTGCAATCCGG  
 ACCAGTGCTGGATTCAAAGCATCTCTGTGTGTAGTAAAAACATTCTCAAAGAATTGTTT  
 ATGCAAATAAACATTCTTTTCCCAAATATCACGAGGCACACGAACATCTAGGAAGACAT  
 TTCCACATTTTGTCTTGTGTTTGTTCATTTAAAAAGACTACGATTCTTTCTGCGTTGTAGA  
 AACTAGTAAGAACACTACTGTTTGTTCCTAGCTAGTACACTGGCTTCCCCCTGAGGCC  
 TTCTAAGGGGTTAAGATGTGTATTTCTGTACGTCTGGTTTTATCAGTGACAATAACAAG  
 GATAGATTTTTTAAAATAAATTGGTTCTGTTCACCAAAGAAAAATGTTGAAAAAAAATCT  
 GTGCACCTCTTTTCAGTCTGTTTCTGTGAGTCTGCCTTTGAGAAAAATATATAAATATGT  
 ACTTTGTTCTTTTCTTGGTCATACTGTGAATGAATGGTAGGGATGGCTGGCTCTGTCTC  
 TCCTTGAAAAGAATAAGAATTGTGTTTCTCTAGTAAGCTATTATAACACTTATTAATCA  
 TCAACAACACTACATGCTCTCTGGACATTGAGATGCCTTTAGATTTTGTGTTTTGTTTT  
 GTTTTTTAGAGCTACACAAGTTTTTGTGAGAATTTCTTTAGAAACATACACGCCTTTAATC  
 CCAGCACTTGGGAGGCAGAGGCAGGCGGATCTCTGTGAGGTCCAGGCCAGACTGGTCTTT  
 CAGAACAGTCAGGGCTACACAAAATTTTAAAATAGAAAGGAATATACTTTAGTGAGGAGG  
 AGCTGAAGATGAGAAAAAATATGATAAAAAGGTAAGTGTAAAAAATTTCAATAAAAAAAA  
 TTACCTAGGTGTGGTGTATACACCTTAATTTTACAGACTTGAAAGGCAGAGCCAGGAGGA  
 TCTCTTGAGTTCAAGGCCAACCTGGTCTACAGACCAGGAGTTTCAGGACAGCCAGGGCTA  
 CACAGAGAAACCTATCTTAAAGTAAAAAATAAAAAA

|         | Sequence                | Tm |
|---------|-------------------------|----|
| Forward | ATAAACGACAAAGGTGCCTGGAC | 60 |
| Reverse | CTATTGCCTGCATTATGAGGCG  | 61 |

**CCL6**

>NM\_009139 NM\_009139 Mus musculus chemokine (C-C motif) ligand 6 (Ccl6), mRNA. 3/2007

TTGTGTATTATGTAGCCAGGGACAGCATTCTGAACTCTACCCTGGCACTTCTGAACTC  
 CTAGCTTATAAATACCAGGGCAGGCCAGAGAATCAGGGAGGAGTGAGCAAAAATTTCTCAG  
 ACCAGCTGGGCCTGTCTCCAGGAGGATGAGAACTCCAAGACTGCCATTTTCATTCTTTA  
 TCCTTGTGGCTGTCTTGGGTCCCAGGCTGGCCTCATAAAGAAATGGAAAAAGAAGATC  
 GTCGCTATAACCCTCCAATAATTCATCAAGGCTTTCAAGACACTTCTTCAGACTGCTGCT  
 TCTCTTATGCCACACAGATCCCATGTA AAAAGATTTATATATTATTTCCCCACCAGTGGTG  
 GGTGCATCAAGCCGGGCATCATCTTTATCAGCAGGAGGGGAACCCAGGTCTGTGCCGACC  
 CCAGCGATCGGAGAGTTTCAAGGTTGCCTAAGCACCTGAAGCAAGGCCAAGATCTGGGA  
 ACAAGGTCAATTGCTTGAAGAAGGAGGGCAGGCATTGTCAACCACTTTCTTCTGTCTTCCCC  
 AGTGACCGCTGCCTAGGAGACCTTGTGTTTTATAGATATTTAAAGCATTATCTCTTCTGT  
 TCAGGTTTAGAGCAGTCAACAGTATTCATGTGACTCCGCCTGACACGGTTAGAGCCATC  
 TGGAGTTGTAACATCAAGATTGTCTTTGAGTAATTGTTGGGTTTTTTTTTTCGGTTTTCTCA  
 GCAGATTATAAATGGATACATTATTAGGGTAGTCTTTGGGGCTTTGGAATGTGTCTGGTT  
 CTGATACAAGCTTAAGCCGGGTAATATCTAGCTGAGATGAAATCAATTTTGCCCTAGGCC

ATACATATGTCCAGCTTTTGTGGGTTCCAGTTGTTTCGCCCTGCCACAATAGAGCAATGAG  
 TGCCCCAATAAAGTCCACTCCATGTAGCCACAGGACTGTCTCTTTCTTCAGATTCATAG  
 AACTACGGGGCCAGTCTGAAACTGGGCTCTTGGGGTGAAATTATCTCACTCACTCACCTT  
 GAGTACAGGAGGGAGATGGGACCATATAACTTTGAATATTCTAAACCAAAAGACATCATG  
 GTATAATTTTTAAAAATTAAGAACACGGTTTATTCTCTGAGCTTGGTGCAAAAACAGAGG  
 AATACCTTTTTCCAGCAGGGCGTCTTCTTCTCTGCCTGACTTTTATCTGCGGAACCTGACC  
 TTCACACCCTCTACCTGAGGAAGTTTACGGTAGTTGTTGGCAAATCTACAAGTAAGAACCT  
 GCACACCAAGTATCTGGGATTCTGGAATGCCTCTCCATGCAAATGAGGCATTCCCAGTA  
 CTTTAAACTTCATCTAGTAATTTACATTTACCCTGAAAACCTTCTTCTATACTCCAAGGT  
 TCATGTATAGCCCTGGTTTACCCCAATAAAGTGTATGCACACAAGCTGTTTTCACTG

|         | Sequence           | Tm |
|---------|--------------------|----|
| Forward | TGCCGACCCAGCGA     | 60 |
| Reverse | TTGGGCCTTGCTTCAGGG | 61 |

### CXCR3

>NM\_009910 NM\_009910 Mus musculus chemokine (C-X-C motif) receptor 3  
 (Cxcr3), mRNA. 1/2007

GCAAGTTCCCAACCACAAGTGCCAAAAGGCAGAGAAGCAGGCAGCAGACCTGACCCCA  
 GCAGCCACAGCCGGAGCACCAGCCAAGCCATGTACCTTGAGGTTAGTGAACGTCAAGTGC  
 TAGATGCCTCGGACTTTGCCTTTCTTCTGGAAAACAGCACCTCTCCCTACGATTATGGGG  
 AAAACGAGAGCGACTTCTCTGACTCCCGCCCTGCCACAGGATTTTTCAGCCTGAACTTTG  
 ACAGAACCTTCTGCCAGCCCTCTACAGCCTCCTCTTCTTGGCTGGGGCTGCTAGGCAATG  
 GGGCGGTGGCTGCTGTGCTACTGAGTCAGCGCACTGCCCTGAGCAGCAGGACACCTTCC  
 TGCTCCACCTGGCTGTAGCCGATGTTCTGCTGGTGTAACTCTTCCATTGTGGGCAGTGG  
 ATGCTGCTGTCCAGTGGGTTTTTCGGCCCTGGCCTCTGCAAAGTGGCAGGCGCCTTGTTC  
 ACATCAACTTCTATGCAGGGGCTTCCCTGCTGGCTTGTATAAGCTTCGACAGATATCTGA  
 GCATAGTGCACGCCACCCAGATCTACCGCAGGGACCCCCGGGTACGTGTAGCCCTCACCT  
 GCATAGTTGTATGGGGTCTCTGTCTGCTCTTTGCCCTCCCAGATTTTTCATCTACCTATCAG  
 CCAACTACGATCAGCGCCTCAATGCCACCCATTGCCAGTACAACCTTCCACAGGTGGGTC  
 GCACTGCTCTGCGTGTACTGCAGCTAGTGGCTGGTTTTCTGCTGCCCTTCTGGTCATGG  
 CCTACTGCTATGCCCATATCCTAGCTGTTCTGCTGGTCTCCAGAGGCCAGAGGCGTTTTTC  
 GAGCTATGAGGCTAGTGGTAGTGGTGGTGGCAGCCTTTGCTGTCTGCTGGACCCCTATC  
 ACCTGGTGGTGTAGTGGATATCCTCATGGATGTGGGAGTTTTTGGCCCCGCAACTGTGGTC  
 GAGAAAAGCCACGTGGATGTGGCCAAGTCAGTCACCTCGGGCATGGGGTACATGCACTGCT  
 GCCTCAATCCGCTGCTCTATGCCTTTGTGGGAGTGAAGTTCAGAGAGCAAATGTGGATGT  
 TGTTACAGCGCCTGGGCCGCTCTGACCAGAGAGGGCCCCAGCGGCAGCCGTTCATCTTTCAC  
 GGAGAGAATCATCTGGTCTGAGACAACCTGAGGCCTCCTACCTGGGCTTGTAAATTCTGGA  
 CTGGAACCTGTAGCCTGCGCAGCCCAAGTCTAACACACTCCAAGTGTCTTGTCTCTTGT  
 AGTTGGGCTAGCTCGAAGTTACCCGTAACCTTTGCTGCCAGGATGCACTGACAGCTCAGCA  
 TATATCCAGGTCTCCTGAGAATCAATCTCAGCAACAAGGACAACACCATTACTGTGCCTT  
 AGCTGCCATGCCCTATCTTGTCTGTTTTAGAAGTACTGCTGCTGGAGCCCCACCGCCCTACT  
 AAATTAGCAAGTAGAAGTCAAGCCATCCCTGTGTGAGAAGAGGGAGAGGCAAATAGCACAG  
 AGGGCCAGGCGTTGTGCACTGAATGTGCCCATCTCAGTATCTCAATATTTGCCCAATT  
 TTATTTCTAGAAACCTCACTTAAACTTTCAATAAACAAGGTAATGAGG

|         | Sequence               | Tm |
|---------|------------------------|----|
| Forward | ATGCTGCTGTCCAGTGGGTTTT | 62 |
| Reverse | GAACAAGGCGCCTGCCA      | 60 |

### TNF-alpha

>NM\_013693 NM\_013693 Mus musculus tumor necrosis factor (Tnf), mRNA. 3/2007

CCTCAGCGAGGACAGCAAGGGACTAGCCAGGAGGGAGAACAGAACTCCAGAATCTTGG  
 GAAATAGCTCCCAGAAAAGCAAGCAGCCAACCAGGCAGGTTCTGTCCCTTTCACTCACTG  
 GCCAAGGCGCCACATCTCCCTCCAGAAAAGACACCATGAGCACAGAAAGCATGATCCGC  
 GACGTGGAACCTGGCAGAAGAGGCACTCCCCAAAAGATGGGGGGCTTCCAGAACTCCAGG  
 CGGTGCCTATGTCTCAGCCTCTTCTCATTCTGCTTGTGGCAGGGGGCCACCACGCTCTTC  
 TGCTACTGAACTTCGGGGTGATCGGTCGCCAAAAGGGATGAGAAGTTCCCAAATGGCCCTC

CCTCTCATCAGTTCTATGGCCCAGACCCTCACACTCAGATCATCTTCTCAAAATTCGAGT  
GACAAGCCTGTAGCCCACGTCGTAGCAAACCACCAAGTGGAGGAGCAGCTGGAGTGGCTG  
AGCCAGCGCGCAACGCCCTCCTGGCCAACGGCATGGATCTCAAAGACAACCAACTAGTG  
GTGCCAGCCGATGGGTTGTACCTTGTCTACTCCCAGGTTCTCTTCAAGGGACAAGGCTGC  
CCCGACTACGTGCTCCTCACCCACACCGTCAGCCGATTTGCTATCTCATACCAGGAGAAA  
GTCAACCTCCTCTCTGCCGTCAAGAGCCCTGCCCAAGGACACCCCTGAGGGGGCTGAG  
CTCAAACCTGGTATGAGCCCATATACCTGGGAGGAGTCTTCCAGCTGGAGAAGGGGGAC  
CAACTCAGCGCTGAGGTCAATCTGCCAAGTACTTAGACTTTGCGGAGTCCGGGCAGGTC  
TACTTTGGAGTCATTGCTCTGTGAAGGAATGGGTGTTTCATCCATTCTCTACCCAGCCCC  
CACTCTGACCCCTTTACTCTGACCCCTTTATTGTCTACTCCTCAGAGCCCCCAGTCTGTG  
TCCTTCTAACTTAGAAAAGGGGATTATGGCTCAGAGTCCAACCTCTGTGCTCAGAGCTTTCA  
ACAACACTCAGAAACACAAGATGCTGGGACAGTGACCTGGACTGTGGCCCTCTCATGCA  
CCACCATCAAGGACTCAAATGGGCTTTCCGAATTCAGTGGAGCCTCGAATGTCCATTCT  
GAGTTCTGCAAAGGGAGAGTGGTCAGGTTGCCTCTGTCTCAGAATGAGGCTGGATAAGAT  
CTCAGGCCCTTCTACCTTCAGACCTTTCCAGACTCTTCCCTGAGGTGCAATGCACAGCCT  
TCCTCACAGAGCCAGCCCCCTCTATTTATATTTGCACTTATTATTTATTATTTATTTAT  
TATTTATTTATTTGCTTATGAATGTATTTATTTGGAAGGCCGGGGTGTCTGGAGGACCC  
AGTGTGGGAAGCTGTCTTCAGACAGACATGTTTTCTGTGAAAACGGAGCTGAGCTGTCCC  
CACCTGGCCTCTCTACCTTGTTCCTCCTCTTTTGTCTTATGTTTTAAAACAAAATATTTAT  
CTAACCCAATTGTCTTAATAACGCTGATTTGGTGACCAGGCTGTGCTACATCACTGAAC  
CTCTGCTCCCCACGGGAGCCGTGACTGTAATTGCCCTACAGTCAATTGAGAGAAATAAA

|         | Sequence           | Tm |
|---------|--------------------|----|
| Forward | CGCCAACGCCCTCCTG   | 61 |
| Reverse | GCTGGCACCAGTGGTTGT | 60 |

#### TAPI

>NM\_013683 NM\_013683 Mus musculus transporter 1, ATP-binding cassette, sub-family B (MDR/TAP) (Tap1), mRNA. 2/2007

ATGGCTGCGCACGTCTGGCTGGCGGCCCTGCTCCTTCTGGTGGACTGGCTGCTGCTG  
CGGCCATGCTCCCGGAATCTTCTCCCTGTTGGTTCCTGAGGTGCCGCTGCTCCGGGTC  
TGGGTGGTGGCCCTGAGTCGCTGGGCCATCCTAGGACTAGGGGTCCGCGGGTCTCGGG  
GTCACCCGAGGACCCATGGCTGGCTGGCTGCTTTGTCAGCCGCTGGTGGCCGACTGAGT  
TTGGCCCTGCTGGACTTGCCTTGTTCGAGAGCTGGCCGCTGGGGAACACTCCGGGAG  
GGTGACAGCGCTGGATTACTGTACTGGAACAGTCGTCCAGATGCCTTCGCTATCAGTTAT  
GTGGCAGCATTGCCCGCAGCCGCCCTGTGGCACAAGTTGGGGAGCCTCTGGGCGCCAGC  
GGCAACAGGGACGCTGGAGACATGCTGTGTCGGATGCTGGGCTTCTGGGCCCTAAGAAG  
AGACGTCTCTACCTGGTTCTGGTTCTCTTGATTCTCTCTTGCCTTGGGGAAATGGCCATT  
CCCTTCTTACGGGCCGATCACTGACTGGATTCTTCAGGATAAGACAGTTTCTAGCTTC  
ACCCGCAACATATGGCTCATGTCCATTCTCACCATAGCCAGCACAGCGCTGGAGTTTGA  
AGTGATGGAATCTACAACATCACCATGGGACACATGCACGGCCGTGTGCACAGAGAGGTG  
TTTTCGGGCCGCTCTTCCGAGGAGACAGGGTTTTTCTGAAGAACCAGCAGGTTCCATC  
ACATCTCGGGTGACTGAGGACACAGCCAACGTGTGCGAGTCCATTAGTGACACGCTGAGC  
CTGCTACTGTGGTACCTGGGGCGAGCCCTGTGTCTCTTGGTGTTCATGTTTTGGGGGTCA  
CCGTACCTCACTCTGGTCACCCCTGATCAACCTGCCCTGCTTTTTCTTTTGCCTAAGAAG  
CTGGGAAAAGTGCACCAGTCACTGGCAGTGAAGGTGCAGGAGTCTCTAGCAAAGTCCACG  
CAGGTGGCCCTTGGAGCCTTATCGGGCATGCCTACCGTGGGAGCTTTGCCAACGAGGAG  
GGTGAGGCCCAGAAGTTTCCAGGACAGGTTTGAAGAAATGAAGACTCTAAACAAGAAGGAG  
GCCTTGGCTTACGTGGCTGAAGTCTGGACCACGAGTGTCTCGGGAATGCTGCTGAAGGTG  
GGAATTCTGTACCTGGGCGGGCAGCTGGTGATCAGAGGGACTGTGTCAGCAGCGGCAACCTT  
GTCTCATTCTCTCTACAGCTTTCAGTTTACCAGGCTGTTTCAGGTCCTGCTCTCCCTC  
TACCCCTCCATTCAGAAGGCTGTGGCTCCTCAGAGAAAATATTTCGAATACTTGGACCGG  
ACTCCTTGCTCTCCACTCAGTGGCTCGTTGGCACCCCTCAAACATGAAAGGCCCTTGTGGAG  
TTCCAAGATGTCTCTTTTGCCTACCCAAACCAGCCCAAAGTCCAGGTGCTTTCAGGGGCTG  
ACGTTTACCCTGCATCCTGGAACGGTGACAGCGTTGGTGGGACCCAATGGATCAGGGGAAG  
AGCACCGTGGCTGCCCTGCTGCAGAACCTGTACCAGCCACCGGGGGCCAGCTGCTGCTG  
GATGGCCAGCGCCTGGTCCAGTATGATCACCATTACCTGCACACTCAGGTGGCCGAGTG  
GGACAAGAGCCGCTGCTATTTGGAAGAAGTTTTTCGAGAAAATATTGCGTATGGCCTGAAC  
CGGACTCCAACCATGGAGGAAATCACAGCTGTGGCCGTGGAGTCTGGAGCCCACGATTTT

ATCTCTGGGTTCCCTCAGGGCTATGACACAGAGGTAGGTGAGACTGGGAACCAGCTGTCA  
GGAGGTCAGCGACAGGCAGTGGCCTTGGCCCGAGCCTTGATCCGGAAGCCACTCCTGCTT  
ATCTTGGATGATGCCACCAGTGCCTTGGATGCTGGCAACCAGCTACGGGTCCAGCGGCTC  
CTGTATGAGAGCCCCAAGCGGGCTTCTCGGACGGTCTTCTTATCACCCAGCAGCTCAGC  
CTGGCAGAGCAGGCCACCACATCCTCTTTCTCAGAGAAGGCTCTGTTCGGCGAGCAGGGC  
ACCCACCTGCAGCTCATGAAGAGAGGAGGGTGCTACCGGGCCATGGTAGAGGCTCTTGCG  
GCTCCTGCAGACTGACAAGGCCTCTGGACTGCACACTGCG

|         | Sequence            | Tm |
|---------|---------------------|----|
| Forward | GGCCCGAGCCTTGATCC   | 60 |
| Reverse | GGGCACTGGTGGCATCATC | 61 |

**TIRAP**

>NM\_054096 NM\_054096 Mus musculus toll-interleukin 1 receptor (TIR) domain-  
adaptor protein (Tirap), mRNA. 12/2006

CAGCGTGGAGCCGCTAGACTTTAAGAAACAATATCAACCAGCATAACCGAAACACAGATC  
CCGAGTCCCTACCAAGCCACTTTTCACAGGCTTTCTTGTGTAACCTGCATCCAGAACAGTA  
AGTCTATATGGAGACACCAAGACCTAGGAAGACTGTTGAAGGCCATGGTCAGCAGGAGGT  
GCAAACCCATGCAATCTACCTGGAATCGGCTGTCTTCACCATTTTATGACTTTGTTTGCC  
TAGCTGACGGATCTCAAATGCCCTCCTGGCCAGGTGAAGCGGAGAAACAATCGCTCTACCA  
AGTTCATACCTTGATGGCTGATCCATGAAGTTCAGACTGGATCTCTTCTCTCCCGCGTT  
CCCCAATGCCTGCTCTTTTCATGGTTAGTTTGGAGGCCTGCACTATGGCTTCATCCTCCT  
CCGTCCAGCCTCCTCCACTCCGTCCAAGAAGCCTCGAGACAAGATAGCTGACTGGTTCA  
GGCAGGCTCTGTTGAAGAAGCCCAAGAAGATGCCGATCTCCAGGAAAGCCACCTCTATG  
ATGGTTCACAGACAGCCACACAGGATGGTCTCTCACCCCTCGAGCTGCAGCTCACCCCCGA  
GTCACAGTTCACCCGAGAGCCGTAGCTCACCCCTCGAGCTGCAGTTCAGGAATGTCACCTA  
CCTCGCCACCAACACACAGTGGACAGCAGCAGCAGCAGCAGTGGCCGCTGGAGCAAAGACT  
ACGATGTCTGCGTGTGCCACAGTGAGGAGGACTTGGAGGCGGCCAGGAGCTGGTCTCCT  
ACTTGGAGGGTAGCCAGGCCAGTCTACGCTGCTTCTTGCAGCTTTCGGGATGCAGCCCCGG  
GTGGCGCCATTGTTTCGGAGCTATGCCAGGCACTGAGTCGTAGTCACTGCCGTGTGCTGC  
TCATCACTCCAGGCTTCTTTCGGGACCCCTGGTGAAGTACCAGATGCTGCAGGCCCTGA  
CGGAGGCCCGCGTTCGGAGGGTTGCACCATAACCCCTGCTGTCCGGCCTGTCCAGAGCCG  
CCTACCCGCGGAACTCCGATTCATGTACTATGTGGATGGCAGAGGCAAGGACGGAGGCT  
TTTACCAAGTCAAGGAGGCTGTTATACACTATCTGGAGACACTAAGCTGACACTTGGGCT  
TTCATAAAGAAAAGCTGGGAATAGCTCACAGCAGTCATTAATCCAGTATATACAGCAGAGC  
CAGAGCCAGCTGCACCCTGTTTATGACACAGGATCAGATCGTACCAGCTTCCATTATCG  
TGGGCCCCAAGATGGCCAGGCTGAAGATGGGAACCACCCCGCAAGGAGACCAGGAAGA  
AGATGGGGACTCCCCAAGAAGGGCAGGAGGAAGCCAGGGACTCCCCAGGAAGACAACGA  
GGAAGTCAGAAATTCGAGTTGTCAAGGGACTGTGCTATCGGGAAGGTGAGCAGTGTCCCC  
TCTGCGCTGAACTGGATAGGAAGCTGATACATGGCTGTCTTCTTCTTCTGGCATCAGGCA  
CGGGGAAATGGATAACACTCCTCAAGAGGGGTGAACCCGATTGATGAGCCAGAAGTTGC  
CTAGGGAAGCTGAGAAGAGGTGGCAAGTATCCAGTCCCTTACACACACACACTACTGA  
AACTCTTCCCCAGAGATGTCAACTCACCTCACAAAACCTGGAAGACACGTTTCATCCCCATA  
CTGAATTTACCTTTTGAATAAATAATGTCATTAATAAATGCACCCCGAGGGGCTGGGGAGA  
CAGTGGTTTCAGCGGTTAAGAAGTCTTGTGCTTTTCCAGAGGATCCAGGTTCAATTCCCA  
GGATCCACATGGTGACTCCCAACCTTATCTATAACTCTGCTTCCAGGGGATCTGATGTCT  
TCTCTGACCAAGACCTCCTTGGACACCAGGTACACACGTGAACACCTCCATAGATGCAGG  
CAAAAACATCATAACATAAAGAAATCTTCTTTTTTACATCAGAAGTGAAAACCTAGGAC  
TCTAGATGGAGTCCGTGGTAGGCTTGCTTAGCATACTGAGGGCTTGGATTCTACCTCCA  
GCACCACAAAACAAAGGAGAAAACAAAACCTGGCAGCTGCTCTGTATCCAGAAAACAGG  
TAAGAAGAAGGAAAGCCAGGGTGGAGCCAGGCGGTGGTGGCACACGCCTTTAATCCCAGCA  
CTCGGGAGGCATTGGCAGGCGGATTTCTGAGTTTCGAGGCCAGCCTGGTCTACAGAGTTCC  
CGGACAGCCAGGGCTACACAGAGAAAACCTGTCTCGAAAACCAAAAAAAAAAAAAA

|         | Sequence              | Tm |
|---------|-----------------------|----|
| Forward | TCTCCCGCGTTCCCC       | 62 |
| Reverse | AGTGCAGGCTCCAAACTAACC | 60 |

RIP1 (Ripk1)

>NM\_009068 NM\_009068 Mus musculus receptor (TNFRSF)-interacting serine-threonine kinase 1 (Ripk1), mRNA. 12/2006

CGAAAAGCGCGGAACCTTGCTGTCATCTAGCGGGAGGTTGGACTCTTCTTGAGGTCGTTTT  
AGCTCAAGTCGAGACTGAAGGACACAGCACTAAGCAAGAACC AAAAGTGGTGTGTTGGAG  
ATTCTGAGCAATCAAAATGCAACCAGACATGTCCTTGGACAATATTAAGATGGCATCCAG  
TGACCTGCTGGAGAAGACAGACCTAGACAGCGGAGGCTTTCGGGAAGGTGTCCTTGTGTTA  
CCACAGAAGCCATGGATTTGTCATCCTGAAAAAGTATACACAGGGCCCAACCGCGCTGA  
GTACAATGAGGTTCTCTTGGAAAGAGGGGAAGATGATGCACAGACTGAGACACAGTCGAGT  
GGTAAGCTACTGGGCATCATCATAGAAGAAGGGAACCTATTTCGCTGGTGTGAGTACAT  
GGAGAAGGGCAACCTGATGCACGTGCTAAAGACCCAGATAGATGTCCCCTTTTCATTGAA  
AGGAAGGATAATCGTGGAGGCCATAGAAGGCATGTGCTACTTACATGACAAAAGGTGTGAT  
ACACAAGGACCTGAAGCCTGAGAATATCCTCGTTGATCGTGACTTTTACATTAAGATAGC  
CGATCTTGGTGTGGCTTTCCTTTAAGACATGGAGCAAACTGACTAAGGAGAAAAGACAACAA  
GCAGAAAAGAGTGAGCAGCACCCTAAGAAGAAACAATGGTGGTACCCTTTACTACATGGC  
ACCCGAACACCTGAATGACATCAATGCAAGCCCACGGAGAAGTCGGACGTGTACAGCTT  
TGGCATTGTCCTTTGGGCAATATTTGCAAAAAAGGAGCCCTATGAGAATGTCATCTGTAC  
TGAGCAGTTTCGTGATCTGCATAAAATCTGGGAACAGGCCAAATGTAGAGGAAATCCTTGA  
GTACTGTCCAAGGGAGATCATCAGCCTCATGGAGCGGTGCTGGCAGGCGATCCCAGAAGA  
CAGGCCAACATTTCTTGGCATTGAAGAAGAATTTAGGCCTTTTTACTTTAAGTCATTTTGA  
AGAATATGTAGAAGAGGATGTGGCAAGTTTTAAAGAAAGAGTATCCAGATCAAAGCCCAGT  
GCTGCAGAGAATGTTTTCACTGCAGCATGACTGTGTACCCTTACCTCCGAGCAGGTCAAA  
TTCAGAACAACCTGGATCGCTGCACAGTTCCCAGGGGCTCCAGATGGGTCTGTGGAGGA  
GTCCTGGTTTTCTTCTCCCCAGAGTACCCACAGGACGAGAATGATCGCAGTGTGCAGGC  
TAAGCTGCAAGAGGAAGCCAGCTATCATGCTTTTTGGAATATTTGAGAGAAAACAGACAAA  
ACCCGAGCCAAGGCAGAATGAGGCTTACAACAGAGAGGAGGAAAAGGAAACGAAGGGTCTC  
TCATGACCCCTTTGCACAGCAGAGAGCTCGTGAGAATATTAAGAGTGCAGGAGCAAGAGG  
TCATTCTGATCCCAGCACAAACGAGTCGTGGAATTTGCAGTGCAACAGCTGTCATGGCCAGC  
CACCCAAACAGTTTGGAAACAATGGATTTGATAATCAGCATGGATTTGGAACACAGGTAC  
AGGAGTTTGGTATCCCGCAAATCTAAGCCAAATGTATAGTACTTATAAAAACCTCCAGTGCC  
AGAGACCAACATACCCGGGAAGCACACCCACCATGCCATACTTCTCTGGGCCAGTAGCAGA  
TGACCTCATAAAAATATACTATATTCAATAGTTCTGGTATTTCAGATTGGAAAACCACAATTA  
TATGGATGTTGGACTGAATTCACAACCACCAAAACAATACTTGCAAAAGAGTGCAGCTTC  
CAGACACCAAGCCATCTTTGATAACACCACTAGTCTGACTGATGAACACCTGAACCCTAT  
CAGGGAAAACCTGGGAAGGCAGTGGAAAACTGTGCCCGCAAGCTGGGCTTCACTGAGTC  
TCAGATCGATGAAATCGACCATGACTATGAAAGAGATGGACTGAAAGAGAAAAGTTTACCA  
AATGCTTCAGAAGTGGCTGATGCGGAAGGCACCAAAAGGGGCCACAGTGGGAAAGTTGGC  
CCAGGCACTTCACCAATGTTGCAGGATAGACCTGCTGAACCACTTGATTTCGTGCCAGCCA  
GAGCTAAGCCTGGGCAGGCTCTGGCAGTGGGAAGCAAATAATTTGTCTGGTGCACAAACC  
CCGTTTGGCCACTAGCCTTTCAGAACTCTATCTCAGCATGAGCTCTGCATTTGAGCACACA  
GGGTCATGCAGTTTGGAACTGGTGGATGGGAAGAGAAAATCTGAAGCCCACAGTGATTCTT  
CAGAACATGCAAGCATAAAAGACCGCTGAATGAATGGTCCGTCCATGACCAGTAGGAGGAA  
AAAAATTAATAATACAGTGTATTGAGTTTTCAAAGGGAGAGAAAGATGTTGGGGGAAGGTG  
GCCTTCGTTTCAGCTTGTGTCATAGTCATCACTTAGGTTATTTGCTCAGTTTTCTGTGGTT  
TCATTGGGTAAGGGGAAAAACAACAAAAACATTCAAAGAATGTAAAATCAGCTAGCTTC  
CCGCTTCATGGACTGTGAGTCAGAAAAGTTCTGCTCAAATGCCTTCTATGAGCCACGGCT  
CTTCTAAAAACTATAGGATCTGTAACTTGAGCATCCAATGCTGTACTGTACCTTAAGC  
TTTAAGAAATCATGTGTAATTTCTAGTCTATCAAATTATCAATTAGTGAGAGATTTTTAAGG  
AGTGCTAAGGAGAAAAAGGTGCAGGGCAGAGAGAGATCTTCAGGTAAGTGGCTGTCAATTGC  
AGCTCAGGTAAGTGGCTGTCAATTGCAGAGCTGCTGCTGGTTCTGGCTGCTGTAAAAAGTCT  
ACTTTTTAAGTTTTCTAAAGTTTTCTCTACCATTCTGGCGCTTCATGCAGTTTTCCACCCTGT  
GAGCCCCACAGAGGGAAACAGATGTGCAGGAAAACACTGATCGGGAAAATACCATCTCCTCCT  
CTCTGGATATGACTGGTGCCTTAGCACTGTTCCCTGTGCCAATAAACTGTTTCTCAGT  
TTTTCTCAGTGTGCTGTACAAATATGTTTCTTCTGTGTGCCACCAATCAAGAAAGGACAG  
CTTCAGAGTCATCTTGTGCCCTTTAGGAAGCCCATAATTGCAACCTACAAGTGAGTGAAGGA  
GCTAGGGTAGAAGACTGAAGCCGCCTACACCAGCCACAGTCACTGTTAGGATGGGCTGCA  
CAGCCGCTTTGGCCTTGTGGCCATTCTGGCACTCATTGGCACTTCATCCTCCTTTGTTG  
GGCTATCCTGTACTCAGTAGGATATTTGGGAACATTCCTGGCCTCCATCTGCAAGATGCC  
AACAGTACAAGTCAACCTCACAACACCCACCAGGTGTGAGAAAAATAACTAGATATTGCT

ACATGTTCTTTGGAGGGACTCTCCTGTAACGTTATTTCCCCATCCCCAGACAAGGTTTC  
 TCAGTTCTCGCTGTCTGGAACCTACTTTGTAGACCAGATTGGTCTCCAATTCAGAGAT  
 CTGCCTGCCTCTGCCTCCTGAGTGCTGGGAATAAAGGCATGTGCCACCACCACCCAGCTT  
 CCTGCTGTAAGTTTATATGCCTTACTTCTCCTGTACACAGGCTAGGCCATCATTAAACAG  
 CATGGAACATGCACAGTGAAGGGAATTGGAGCAGGGAAGGTTCCAGGCTTTCTGAAAGG  
 AGCCTGCATAGTCTTTAAAAAATGTTTTCTTTTTAACTTCTAATGCTGTTTTAAGAAGAC  
 AGAATTAGAACTGCTTCTAGTGGAGTTTTAAGGAGAATAAAATAGCAAGGGAGGCCAGA  
 GCTGGTTTTGGAATTGCAGTAGCAATCAGGGTCTAGTATTTAAATCATGTCTGTTAGTG  
 TTCAGTAGGGGAAGACTTGTGTGTCCACTGCTGAAGATAGGTGCTTCAGATCCAGGCCTG  
 GATTGTGACCACAGACTTTTCAGATCTTTTCCAGGCTCACACTGACAGCCAGACAATGGC  
 TTGGCACCTCGAGTTGTGGCTGAGCCTGTATGAGTTGAAGGATGGTCAGTAGATGAAGCC  
 GTTTACTCTCATGGTGTGTGCCCTTGTACAAGAGATCTGGGCGGTGACACAAAGCCAGT  
 CATTGACAGGCTAGACCCAAAGACCTTTAAGCACTCCCATTGCTTCCGCTGTATCACAA  
 TAACTGATGACTTTGTAGTCAGTGGTACCTGCTCCGAACAAGTACGTGGAGTGTGGGAGT  
 CCCTCTGGGAGCCAGCGTGAATTAGAACACCTCTTTAAAGCCACCTCCTAAGCCGAGC  
 AGAATGCAGTGGACTGGGGTACAAGTCAAGCTGAGTGTATTGTCCACATCATGGAAAA  
 ACAAGATGGCCACCAGAACACTGAAGGCCTGAGGAGACTAACCTGTTCCAGAACTCAG  
 AGTTCTGTTTTGGTTCTGTTTTTAATAAGATAACCTTTCTTTAATGTATACATATGCATAT  
 ACATATATATTTGTACTTTAAATACAGAGTACTGAATAAAATTTATGTGACTATAAAAAA  
 AAAAAAAAAA

|         | Sequence                 | Tm |
|---------|--------------------------|----|
| Forward | AAGGGAAC TATTCGCTGGTGATG | 60 |
| Reverse | TATCTGGGTCTTTAGCACGTGCA  | 61 |

NFkB1

>NM\_008689 NM\_008689 Mus musculus nuclear factor of kappa light chain gene enhancer in B-cells 1, p105 (Nfkb1), mRNA. 2/2007

GTCCGTCTGTCTGCTCTCTCCTGACGTCAGTGGGAATTTCCAGCCAGGAAGTGAGAGAGT  
 GAGCGAGAGAGGACGAGAGAGAAGTACCGAGGCGAGCCGGGCAGGAAGAGGAGGTTTTCGC  
 CACCCGAGCAGCCCGGCTGCGCGCTGACGGCTTCCCGTGCCCTGCGCGCCCCCGGCTGC  
 CGCCGCCGCCGCCGCCGCCGCCCTCGGCCTGCTCGCGGGCCGGCTCTAGCAGCGCAG  
 GCCGGAGCTCAGGGCCCCGCCGCCGCCGCCGCCGCCCGCGCTTCTCCGCCCGCGCCGAG  
 CCATGGCGCGCCGCTGAGCCGCCGCCGCCGCCGCCGCCGCCGCCGCCGCCGCCGCCGCCGCC  
 CGCCGGTCCGCGCCGCTCCGCAGCGGGAGCCCGCAGGCGAGGAGAGGCGCGCCGCATCT  
 CCAGGGTACCCTCAGAGGCCAGAAGAGGGTGTGACAGCCCTTGTAACTGGAGTTTGACGG  
 TCGTGAGCTGCGCATCTTACCATGGCAGACGATGATCCCTACGGAAC TGGGCAAATGTT  
 TCATTTGAACTGCTTTGACTCACTCAATATTTAATGCAGAATTATATTACCAGAAAT  
 ACCACTGTCAACAGATGGCCATACTTCAAATATTAGAGCAACCAAAACAGAGGGGATT  
 TCGATTCCGCTATGTGTGTGAAGGCCATCACACGGAGGGCTTCCGGGAGCCTCTAGTGA  
 GAAGAACAAGAAATCTACCCACAGGTCAAAATTTGCAACTATGTGGGGCCTGCAAAGGT  
 TATCGTTTCAAGTTGGTCAAAATGGAATAAATCCACCTGCACGCCACAGCCTGGTGGG  
 CAAGCACTGTGAGGACGGGGTATGCACCGTAACAGCAGGACCCAAGGACATGGTGGTTGG  
 CTTTGCAAACCTGGGAATACTTCAATGTGACTAAGAAAAAGGTATTTGAAACACTGGAAGC  
 ACGGATGACAGAGGCGTGTATTAGGGGCTATAATCCTGGACTTCTGGTGCATTCTGACCT  
 TGCTTATCTACAAGCAGAAGGCCGAGGAGACCGGCAACTCACAGACAGAGAGAAGGAGAT  
 CATCCGCCAGGCAGCCGTGCAGCAGACCAAGGAGATGGACCTGAGCGTGGTGCGCCCTCAT  
 GTTACAGCCTTCTCCCTGACAGCACTGGCAGCTTCACTCGGAGACTGGAGCCTGTGGT  
 GTCAGACGCCATCTATGATAGCAAAGCCCCGAATGCATCCAACCTGAAAATCGTGAGAAT  
 GGACAGAACAGCAGGATGTGTGACGGGAGGGGAGGAGATTTACCTTCTCTGTGACAAGGT  
 TCAGAAAGATGACATCCAGATTCGGTTTTATGAAGAGGAAGAAAATGGCGGAGTTTGGGA  
 AGGATTTGGGACTTTTCCCCACAGATGTTTCATAGACAGTTTGCCATTGTCTTCAAAC  
 GCCAAAGTATAAGGATGTCAACATTACAAAGCCAGCTTCCGTGTTTGTTCAGCTTCGGAG  
 GAAATCAGACCTGGAAACTAGTGAACCGAAACCTTTCTCTACTACCCTGAAATCAAAGA  
 CAAAGAGGAAGTGCAAAGGAAACGCCAGAAGCTTATGCCGAACCTTCTCGGACAGCTTCGG  
 TGGCGGCAGTGGAGCGGGAGCCGGTGGTGGAGGCATGTTCCGGTAGTGGCGGTGGCGGAGG  
 GAGTACCGGAAGCCCTGGCCAGGGTATGGCTACTCGAACTACGGATTTCTCCCTACGG  
 TGGGATTACATTCATCCCGAGTACGAAATCCAACGCAGGGGTACCCATGGCACCAT  
 AAACACCAAATTTAAAAATGGCCCTAAAGATTGTGCCAAGAGTGATGACGAGGAGAGTCT



GACTCTCCCTGAGAAGGAAACTGAAGGTGAAGGGCCAGCCTGCCCATGGCCTGCACCAA  
GACGGAACCCATCGCCTTGGCATCCACCATGGAAGACAAGGAGCAGGACATGGGATTTCA  
GGATAACCTCTTTCTTGGAGAAGGCTCTGCAGCTCGCCAGGCGACACGCCAACGCCCTTTT  
CGACTACGCAGTGACGGGGGATGTGAAGATGTTGCTGGCCGTGCAACGCCATCTCACCCG  
CGTGCAGGATGAGAATGGGGACAGTGTCTTACACTTAGCCATCATCCACCTCCACGCTCA  
GCTTGTGAGGGATCTGCTGGAAGTCACATCTGGTTTTGATCTCTGATGACATCATCAACAT  
GAGAAATGACCTGTATCAGACACCTCTGCACTTGGCCGTGATCACCAAGCAGGAAGATGT  
AGTAGAGGATTTGCTGAGGGTTGGGGCTGACCTGAGCCTTCTGGACCGCTGGGGCAACTC  
TGTCTGCACCTAGCTGCCAAAGAAGGACACGACAGAATCCTCAGCATCCTGCTCAAGAG  
CAGAAAAGCAGCGCCCCCTTATCGACCACCCCAATGGGGAAGGTCTAAATGCCATCCACAT  
AGCTGTGATGAGCAATAGCCTGCCATGTCTGCTGCTGCTGCTGGTGGCTGCCGGGGCAGAAGT  
CAATGCTCAGGAGCAGAAGTCTGGGGCGACAGCGCTGCACCTGGCCGTGGAGTACGACAA  
CATCTCCTTGGCTGGCTGCCTGCTTCTGGAGGGTGTGCCCCAGTGGACAGTACCACCTA  
TGATGGGACTACACCTCTGCATATAGCGGCCGGAAGAGGGTCCACCAGACTGGCAGCTCT  
TCTCAAAGCAGCAGGAGCAGACCCCTGGTGGAGAACTTTGAGCCTCTCTATGACCTGGA  
CGACTCTTGGGAGAAGGCTGGAGAAGATGAGGGAGTGGTGCCAGGTACCACACCCCTGGA  
CATGGCTGCCAACTGGCAGGTATTTGACATACTAAATGGGAAACCGTATGAGCCTGTGTT  
CACATCTGATGATATACTACCACAAGGGACATGAAGCAGCTGACAGAAGACACGAGGCT  
ACAACCTCTGCAAACCTGCTGGAAATTCCTGATCCAGACAAAAACTGGGCCACTCTGGCACA  
GAAGTTGGGTCTGGGGATACTGAACAATGCCTTCCGGCTGAGTCTGCTCCTTCTAAAAC  
TCTCATGGACAACCTATGAGGTCTCTGGGGGTACCATCAAAGAGCTGATGGAGGCCCTGCA  
ACAGATGGGCTACACAGAGGCCATTGAAAGTGTCCAGGCAGCCTTCCGCACCCCGGCAAC  
CACAGCCTCCAGCCCCGTGACCACTGCTCAGGTCCACTGTCTGCCTCTCTCGTCTTCCCTC  
CACGAGGCAGCACATAGATGAACTCCGGGATAGTGACAGCGTCTGTGACAGTGGTGTGGA  
GACATCCTTCCGCAAACCTCAGCTTTACAGAGTCTCTTACTGGAGACAGCCACTGCTATC  
TCTGAACAAAATGCCCCACGGTTATGGGCAGGAAGGACCTATTGAAGGCAAAATTTAGCC  
TGCTGGCCGTTCCCCCACACTGTGTAACCAAAGCCCTGACAGTCCATTGCATCGTCCCA  
AAGGAGGAAGGCAAAGCGAATCCAAAGGTGCTGGAGAATCGCCGGCCTGCAGGGTCACTC  
GATTTTCATTCAAGGCCCTTCCGAATTTGGCGTCTCTTCTTGGTTCTGAAATGAAATGTAGT  
TGCCACGCACAGACGGTGTCTAGCAATCATGGCGCTCGCTCGCTCAGCTGCACCTATGG  
CTCAGGTGCAGTGTCTTGAGCTTTCTCTGCTGCTACTGGATCACATTTGCTTTGTGTTGT  
TACTGCTGTCCCTCCGCTGGGTTTCTGCTGTCAATTAAGGTTGTCGCTGTCCCCACCCGG  
TGTCTTTTCTAGCCATCTACTGTAAGTTGTGCATTCAAATTAAGATTAAGGAAAAACATA  
TTTTTAAATGAGTACCTTGATGCGCAATAAAAAAAGACATTTCTTTTTTTAATGTGGTT  
TATCTGTGATTTAAAAATAAAAAACACATGAACTTACAATATTTAAAAACATGCTACAATC  
AGTGCTGAAAATAGTATTTTTCCCGTTTTATGCATTTTTACTATTGTAATATGTTTTCTA  
AATCAAATACTTTAAAAGAAGAAATGTTGAATTTATAAATGCTATTTACTTTTTTTATTTT  
ACTTTTATAATAAAAGTACAAGCACATTTGTTGACCTAAAAAATAAAAAA

|         | Sequence                  | Tm |
|---------|---------------------------|----|
| Forward | CGAAATCCAACGCAGGGGT       | 62 |
| Reverse | GCACAATCTTTAGGGCCATTTTTAA | 60 |

**TRAM1**

>NM\_028173 NM\_028173 Mus musculus translocating chain-associating membrane protein 1 (Tram1), mRNA. 11/2006

GGGGATGGGAAGTGAAGCCCCAGCGAGCGGCTGCGGGCGGGCTGTGCGGAGCAGCCAGCG  
GGAGGCGGGCGGCGGGCGGCTGAGCAGCCGAGAGCTCGGAGCGGGCGGAGGAAGCACCTG  
CAGGCACAGGCGGCGGCTCCACCATGGCGATTTCGCAAGAAGAGCAACAAGAACCCGCCG  
TGCTGAGCCACGAATTCCTGCTGCAGAATCACGCGGACATCGTCTCCTGCCTGGCGATGC  
TTTTCTGCTGGGGCTTATGTTTCGAGGTAACAGCAAAAGGAGCCATCATCTTTGTTGCTC  
TTCAGTATAATGTTACCCGCCCTGCAACAGAAGAACAAGCTACTGAATCAGCATCCCTAT  
ATCACTATGGTATCAAAGACTTGGCTACAGTTTTGTTCTACATGCTAGTGGCGATAATTA  
TTCATGCCATAAATTCAGGAGTATGTGTTGGATAAAAATTAACCGACGGATGCACTTCTCCA  
AAACGAAGCACAGCAAGTTTAAACGAGTCTGGTCAGCTCAGTGCATTTCTACCTTTTTTGCT  
GTGTGTGGGGCACGTTCACTCTCATCTCCGAAAACCTATATCTCAGACCCAACTATCCTGT  
GGAGAGCCTATCCCATAACCTGATGACATTTTTCAGACGAAGTTTTTCTACATCTCCAGC  
TGGCGTACTGGCTCCATGCATTTCCCTGAACTCTACTTCCAGAAAACCAAAAAAGAAGATA  
TCCCTCGTACAGCTCGTCTACATTTGGCCTTTATCTCTTTTATATTGCTGGAGCCTATCTTC

TGAACTTGAACCACCTGGGCCTTGTCTTCTGGTGCTGCACTATTTTCGTTGAATTTCTTT  
TCCACATTTCTCGTCTATTTTATTTTATTTAGTGACGAGAAGTATCAGAAAGGGTTTTCTCTCT  
GGGCAGTTCTTTTTGTTTTGGGAAGACTTCTGACTCTAATTTCTTTTCAGTTCTTACTGTTG  
GTTTTGGTCTCGCAAGAGCGGAGAATCAGAAGCTGGACTTTAGTACTGGAAACTTCAACG  
TGTTGGCCGTTAGGATCGCTGTTCTCGCGTCCATTTGCATCACACAAGCCTTCATGATGT  
GGAAGTTTCAATTAACCTCCAGCTTCGGAGGTGGAGGGAACATTTCTGCCTTCCAGGCCCCAC  
CTGTGAAAAGGAAACCGGCCGTGACCAAAGGCAGGTCTTCCAGAAAAGGAACAGAGAACG  
GTGTGAACGGCACAGTCACATCAAACGGAGCAGACTCCCCTCGGAACAGGAAAGAGAAGT  
CTTCGTAATGGATCGGAAGCTGACTGATTATTGTCCCCAAAGAATCTGCTTTCTGCTCTA  
TCTTTTCAGCACTAGCAATTTTTCTTTTCTAAAAATACAGTTTTATGCTCTTTGATTTCTGC  
TGTTGTCTCTGTTCTGTCATCGTAAAGGGCATTGAGGGGAGGATAATCACTCTGAGTGAGA  
ACATTTGATAGCTTAGACTCAGCTACCTGCCTTCAGAATAGTTTAGGGACCACCTTTCTTTT  
CTCTTCTTTTCTCCTCTTTTCTACCCCTTTCTTTTTCTTTTTCTTTTTCTTTTTCTTTTTGGGTT  
GGGTTTTGGTTTTGGTTTTGGTTTTGTTTTGTTTTGTTTTGCTTTTGTCTTTAATGGT  
TTTTTTTTTTTTTCTTAATGGTTTTGGGGAGAAAACCATTTACAAAACCCCTGCATAACCAGT  
GAACATTTTTCTTGCTCTCACCAATTTTTTTATAATATTATAGCAAGGTGACCTGTTCTA  
AGAAGGTCATATTTTTTAAGTTGTCTTCAGGGTAAAATGGAAATACTATAAAGTCAGATG  
TCAAACCTTTTAATGTTTTTCAGTGTCTCTAATTTTTTAGGAATTTTTTTGTAGCCTTTACAC  
CTGAAAAAAAATTTGTAAAAATCACCAAATACTTGTGTGCTTTATTTTTCTAAGTTGTG  
GCTGTACATGTTACATCCCATTTCAAAGTACTGATGGCTACTGCAAGATTTATTGCCATC  
CATTGGAGTAGGTGTCTTATTAACATAAGGAAGTGAAGTACTTAGGAAGTGAAGTGAAGT  
TTTTGTGCATTTTCAACATTTATCAACTGGCAATCAGAAAATGTTTATTGTGAAGAGGAA  
TATTTCAACTTACATAGCCCTTTTTGATATGTTAAGTAATGATTCTTAATGGGCTTGTGT  
AAGTTTGTATATGCATAGCATCTTAATGAGATTCTATTTAACCTGCAAGCCCTTTTGAAAA  
GTAATGCCTACTTGGATTTCTATTTAAAAAGAAAAAGGTACCAGGTAATTTCTATTTGGGAAA  
CGAATGCACTAACTTTAAAGAAAATTGAAAATCCAGGTGGATAGTCTTAACAGAGGCATGC  
TTTTATGTTATGTTAGAGCTTTGGACCCATCTTTAATTGAGAAAACGTTTATCTGTATAAAA  
CATATTTTTGGATAAATATATATATATATATTTGTATCTACAGAAAGGCTCTGAAAAGCA  
TTTTGAGTAAAATCTTGGTCCCCTTTTCTATGCTTGTCTCCTCGCACCCCTGCGCTTGGTCTGT  
CCACTGTTGTTTCAGACATACATGCTCCATCGTTTTCTCACTCTGTCCACCAGCTAAAAAAT  
GTCCGTGCCATGTTGACTATAGAAGCCACAAGCCTCAGGCCTGTGGTTAAGTTGCCATGC  
TGCTAGAAAAGTCATGCTTTCTCTTCTCCAGCCGCTTACCTGCTTCTCTGGGAAAAGTAGTCG  
CTCCCTGGAGCAGTACCGACTTTCAGTGGAAACCAAATTTCCGCCCTTAAGACTGGCATT  
TATTGTACGATACATTGAGAAAATCAATCGAAAATAAAAAATTTTTACTTTTACAAGCTGTT  
TCCTGAACAATTCCTTCACTGTAATGTTAAGCTATTTTGAACGTATATTCTCATTAAAG  
TGTAATTT

|         | Sequence             | Tm |
|---------|----------------------|----|
| Forward | GGTGGAGGGAACATTCTGCC | 60 |
| Reverse | GGTCACGGCCGTTTCCT    | 62 |

TICAM-2

>NM\_173394 NM\_173394 Mus musculus toll-like receptor adaptor molecule 2 (Ticam2), mRNA. 11/2006

TCTGCTTCCTCCTGGGGACAGTGCATCCCCACCCTGTAGTTGGTGGCCAGTCTGCCAGA  
GACCCAGGGCTCCGAGAGCACGCAGAGCACGACTTCCAAAGGCAAAGACCATTGCCCGG  
GCTCCATGGCCAGTCTTGGACTTCCACTCCGCGGGCTCAGTGGGCGTGGCGTGCAGACCC  
ACACTGGCCTTGGGACAAGATCTACGACAGTCACATCCTAACTTTTCAGACTTCTGTGGCA  
AGCTACTTGTCAACAAGGGTTTTGCTCAGTGCAGAGGAAGATCGAAGAGCCTCGTGGTCA  
AGCAGTACCCTTCCAGCTAACTGAATTTCTCCTGTGCTCCCACCCACTGGAGGCTAAGG  
CGTCTCAATCACCGAATGGTAAGGTGCCACAGAGCCCAGTGTCAAATGAGTTATTTTTAA  
TATTGAAAAGAAAAATACTCAAATAAAGCTCCCTCGTCTGCCCAACCCTCTGTCTGTTGGA  
TGTTGGGAAGTCTAAACTAGATAAGTGGCCCTTTCTTGGCATAAAAAAGACAGTGTGGA  
TGCCGATCAAGACGGCCATGAGTCAGACTCCAAGAATTCTGAGGAAGCCTGCTTGCCTGG  
TTTTGTGGAGCAGAGCAGTGGATCAGAGCCACCAACAGGAGAGCAGGACCAACCTGAGGC  
AAAGGGGGCGGGCCTGAGGAGCAAGATGAAGAAGAGTTTCTCAAATTTGTGATACTTCA  
TGCAGAAGATGACACCGACGAGGCCCTCAGAGTCCAGGATCTACTGCAAAACGACTTTGG  
TATCAGGCCGGGATCGTTTTTCGCCGAGATGCCGTGCGGAAGACTGCATTTGCAGAATCT  
AGACGATGCGGTCAATGGGTCCGCCTGGACCATCTTGTACTGACTGAGAATTCCTAAG

AGACACCTGGTGTAACCTTCCAGTTCTACACTTCCCTGATGAATTCTGTGAGCAGGCAGCA  
CAAGTACAACCTCCGTCATACCCATGCGGCCCTGAACAGCCCTCTTCCCCGGGAACGGAC  
TCCCTTGGCGCTGCAAACCATCAATGCCTTAGAGGAAGAAAGTCAAGGCTTTTCCACACA  
AGTGGAGAGAATTTTCCGGGAGTCTGTATTTGAGAGGCAACAAAGTATATGGAAAGAGAC  
ACGAAGTGTGTCGCAGAAACAGTTCATTGCCTGAAACCGAGCACACACCCGGGCCGGCTCC  
TGTTTTGTAAACAAAATGATCCATCTTCACTTGAGAGAGTAGTTTTCTAAGAAATGCTTAG  
ACGTGAGTCTGCTTCCAAGAAATCTGTGGCACACAAGAAAGGTACACTTCTGCAGCCCTA  
GGATTGGGCTACTTTTGAATGACAACTCAAGACTGTGAGAGCTTCTGACACTTTTTCTTA  
AAGTTTTCATAGTTCATGAATATTCTTAACTCATTCTTGTGTTGAGCCATAAACAGGCA  
CATGTGGCAAAAATACGATATTGAAAATTTCTCAAAGACTTGAGGGAAATGGGCTCTGGCC  
AGGACAGGTCTGACCACTTCCCTTCTGCTTCTTTCATGAATTTTAGTTACCACAAAGCA  
TCCCTGGTGTGTACACAGAAACATGCAGAATGGGGCACGTGCAGTACTGACATAGTAAG  
TTGGAGATCAGAAGTAGAGGTGAGGGTCAAGGGTCAACCGTTAGTCCCAGCACTAGGGAGGC  
AGAGGCAGGAAGATCTCTCTGAGTTCATAGGCCAGCCTGGCTTACAGAGTGAGTTCCAGC  
ATATCCAGGGCTACACAAAGAACTGTCTCGGGGGGAAAAAATGTCAGAACAGTCAGGCT  
TTTTGAAATAATCCAGCCATGTGTGGTTTTATTTCTGCTGGAATTTGGAAGTACTTCTTA  
CCACAAATTAGCAATCCTTTTCCGAGAGTGTGATAGTGAGGGACTCTGTAGAGATGGGCCCT  
CATCTTGTAGGTGTCTTCTGTGACCAGGGCTTTAATTCACAGAGCTTGTGAAAAATATGT  
GATTCGCCAGCTGTTTTGCCTTTAAAATCAATAACCTCTCGTGTAGCTTTTAGAAATGTC  
CCTTACACACAGTGTTTAACTCGGGGAATATTTCTTATCTAGGGCTATGGGGGTGGAGGG  
GGGAGCGCGCAAGCAAAACCAGGGACCTACACAGACCTGTACCTTTCCGCTCATAGAACT  
TCGACCCATTTGAGACTGAAGCGGTTTAAACAAGCACAGACAGGGCTTGTGGCTAGGGGA  
AAGTGCCTGTGTTGGAATCAGAAGACCGACTTGCAGTCCAAGCTCTGCCCTGCGGATGAA  
TGTGCCAGTGGGCAGCTATTCTCCTTTGTCTGCGAAAATAAAAGGGTTGGATTGATGGGTC  
TCTAAAGGCTTTTGTCTCTCTCTCCAGGATGGGAAAAACCGAAGCCAGAAAGCAATAA  
GCAAAGCCTGAACTTTTTATGAGGTGAAACATAATTGTAATCATTGCAGAAGGCATGACG  
CATGCTTACAACAAACAGATAGATATTTCTGTATATTTGCATCATCATCGATATTTACTG  
CAGTCACAGGAAAGAATTACTATGTATGCCTATACTTGGTTCTTTGGGTTTGGCTTTGTA  
CAGGGTCTCATTATCTAGCCCTGGCTGGCCTGAAATTTGCTATGTAGACGAGATTGGCTT  
CAAACCTCATGGAGATCCACCTGCCTCTGACCCTGACAGTGTCTAAGATTAAGATGGGCAC  
TGCCACACCCTGCTACTCGGGTTTTTAAAGATACATATTTTATAGGAATTCATGAATA  
CCTTCTCCCTAGTTTGCCTGTCTCCTAATCCTCCCTTCTCTAAATCCCCAGGGGCCACTG  
TTTACTTCTTTATAGTTGCAAGCTACTGTGCCCCACAGTCAGACCTGGTGTGGGTTCTC  
AGAGAAGGTGACTGCTTTTATAGCATTCTTCTCAATCCTCTTTGTGATGGTAACTTACTAC  
TTAGCCTTGAGTTTATTGTTATTATTATTAATTATTACTACCATAATCCTCTCTATG  
TCTCAAGTGTGAGTACTCATAAAACATGAACCACCCACCCTTACACGCCTGCCAAGCT  
AGAAGTGTGCTCAATGGCACTTCTTCAATAAACCTTTTTTATTCTTTATGGTTGACTATT  
GGTCTCATCTCCAGTGAAGACTGTGGAAAAGTATTCTGAGAAATACCATCCTGGGCTTGT  
CAGAGAACATGGTGAATGTCCCAGGCAACCTGGAGTTCAGCAATTTTTTTTTTATGATGA  
AGAAATAAATTTAAGTGCAGAGT

|         | Sequence                | Tm |
|---------|-------------------------|----|
| Forward | CGCGCAAGCAAAACCAGG      | 62 |
| Reverse | AATGGGTGCAAGTTCTATGAGCG | 60 |

### Calreticulin

>NM\_007591 NM\_007591 Mus musculus calreticulin (Calr), mRNA. 1/2007

GGCTGTGTGTCAGGTTCCGGGTGAGAGGTAGGTGAATATAAATTGAAGCGGCGGTGGCCGCGT  
CCGTC AATACCGCAGAGCCGCTGCCTGAAGATCGTCTTAAAAGGCCTGTGTGCCGCCGCC  
CCCTCGGCCCGCCATGCTCCTTTCCGGTGCCGCTCCTGCTTGGCCTCCTCGGCCTGGCCGC  
CGCAGACCCTGCCATCTATTTCAAAGAGCAGTTCTTGGACGGAGATGCCTGGACCAACCG  
CTGGGTCGAATCCAAACATAAGTCCGATTTTGGCAAATTTGTCCTCAGTTCTGGCAAATTT  
TTACGGGGACCTGGAGAAGGATAAAGGGCTGCAGACAAGCCAAGATGCCCGATTTTACGC  
ACTGTCCGCCAAATTCGAACCTTTCAGCAATAAAGGGCCAGACACTGGTGGTACAGTTTAC  
GGTGAAGCATGAGCAGAATATCGACTGTGGGGGCGGCTACGTGAAGCTGTTTCCGAGTGG  
TTTTGGACCAGAAGGACATGCATGGAGACTCAGAATATAACATCATGTTTGGTCCGGACAT  
CTGCGGTCTTGGCACCAAGAAGGTTTCATGTCATCTTTAACTACAAGGGCAAGAATGTGCT  
GATCAACAAGGATATCCGGTGTAAAGGATGATGAATTCACACACCTATAACACTGATTGT  
GCGGCCAGACAACACCTATGAGGTGAAAATTGACAACAGCCAGGTGGAGTCAGGCTCCTT

GGAGGATGATTGGGACTTTTCTGCCACCCAAGAAGATAAAGGACCCTGATGCTGCCAAGCC  
 GGAAGACTGGGATGAACGAGCCAAGATCGATGACCCACAGATTCCAAGCCTGAGGACTG  
 GGACAAGCCAGAGCACATCCCTGACCCTGATGCTAAGAAGCCTGAGGACTGGGATGAAGA  
 GATGGATGGAGAGTGGGAACCACCAGTGATTCAAATCCTGAATACAAGGGCGAGTGGAA  
 ACCACGTCAAATGACAACCCAGATTACAAGGGTACCTGGATACACCCAGAAATTGACAA  
 CCCTGAATACTCCCCCGATGCAAATATCTATGCCTATGATAGTTTTTGTGTACTGGGCCT  
 AGATCTCTGGCAGGTCAAGTCCGGGACAATCTTTGACAATTTCTCATACCAATGATGA  
 GGCCTATGCAGAGGAGTTTGGCAATGAGACGTGGGGTGTACCAAGGCTGCAGAGAAGCA  
 GATGAAGGACAAGCAGGATGAGGAGCAGAGGCTTAAGGAAGAAGAAGAGGACAAGAAGCG  
 TAAAGAGGAAGAAGAAGCTGAGGATAAAGAGGATGATGATGACAGAGATGAAGATGAGGA  
 CGAAGAAGATGAGAAGGAGGAAGATGAGGAAGAATCCCCTGGCCAAGCCAAGGATGAGCT  
 GTAGAGGCCACACCACCTGCCTTCAGGGCTGAGGCTGAGCCCTGAACACCCTGCCGAGAG  
 CTGGCTGCTCCCAATAATGTCTCTATGAGACTCAAGAACTTTTCATTTTTTCCAGGCAGG  
 TTCAGATCTGGGGTAGATTCTGATTTTTGTTCCCTGCCTCCCCCATTACCCCCCCCCCTT  
 TTTTTTTTTACTGGTGTGTCTTTAATTCTCCTTCAGCCCTCATCTGGTTTTCTCATTTTT  
 TGAATCAACATCTTTTTCTTCTGTCCCTCCCTTTCTCCATCTTTTTGGTCACTACCCTCCA  
 ACTCTAGGAACAGGGGTGTAGAGGAGAAGCCCTAGGCTTGAGATTTTCATCTGCTCTCCTT  
 CCTGCATCTCAGAGGAGGGCAGGAGAAGGGGTGGTGTTTTTCCCTCCCCCGCACTGAGG  
 AAGAATGGGGCTCTTCTCATCCCTTTCTCCCTTGCCCCAGGACTGGGCCACTTGTGGG  
 GCAGCCAGTTCTAGCACAGCTCACACTGAGAGTGTAAAGAACTACAAACAAAATTTCTATT  
 AAATTAAGTTTTGTGTCTTCCCT

|         | Sequence                | Tm |
|---------|-------------------------|----|
| Forward | ACGCACTGTCCGCCAAATTC    | 62 |
| Reverse | CCGTGAAGTGTACCACCAGTGTC | 60 |

Erp57

>NM\_007952 NM\_007952 Mus musculus protein disulfide isomerase associated 3 (Pdia3), mRNA. 11/2006

CGAGCAGGCCTAGGGGGTTGGGACCTCGGCAGCGGGTCTGCCCGGGCCAGACGCGCGAGC  
 GCAGGCAAGCGGCTGCAGATTGCGGGCTCTCCCATCTCATTCTCCGGTCCCAGCCCTCC  
 GACCGCGACCCCGCCCATGCGCTTCAGCTGCCTAGCTCTGCTCCCGGGCGTGGCGCTGC  
 TGCTCGCCTCGGCCCCGCTCGCCGCGCCCTCCGATGTGTTGAACTGACGGACGAAAAC  
 TCGAGAGTCGCGCTCCGACACGGGCTCGGCGGGGCTCATGCTAGTCGAGTTCTTCGCCC  
 CCTGGTGTGGACATTGCAAGAGGCTTGCCCTGAGTATGAAGCTGCAGCAACCAGATTAA  
 AAGGAATAGTCCCATTAGCAAAGGTGGATTGCACTGCCAACACAAACACCTGTAATAAGT  
 ATGGGGTCAGTGGCTACCCAACCTTTAAGATCTTTAGAGATGGTGAAGAAGCGGGTGTCTT  
 ATGATGGGCCTAGGACTGCTGATGGAATTGTCAGCCACTTGAAGAAAACAAGCAGGACCAG  
 CTTTCAGTTCTCTCAGGACTGAGGAAGAATTTAAGAAGTTTATTAGTGATAAAGATGCCT  
 CAGTGGTGGGTTTTTTTCAGGGATTTATTTCAGTGTGGGCACTCTGAATTCCTAAAAGCAG  
 CCAGCAACTTGAGAGATAACTACCGATTTGCACACACCAACATTGAGTCTCTGGTGAAGG  
 AGTACGATGATAATGGAGAGGGGATCACTATATTCCGTCCATTACATCTTGCTAACAAGT  
 TTGAAGACAAAACCTGTGGCATATACTGAAAAGAAAATGACCAGTGGCAAGATCAAGAAAT  
 TTATTTCAGGATAGCATTFTTGGTCTCTGTCCCTCATATGACGGAAGATAATAAAGATTGA  
 TACAAGGCAAGGACTTACTCACCGCTTACTATGATGTGGACTATGAAAAGAATGCTAAAG  
 GTTCTAACTACTGGAGAAAACAGGGTCATGATGGTGGCAAAGAAAATTCCTTGATGCTGGAC  
 ACAAACCTCAACTTTGCTGTAGCTAGCCGTAAAACCTTTAGCCATGAACTGTCAGATTTTG  
 GCTTAGAAAAGCACTACTGGAGAGGTTCTGTTGTGGCTATCAGAACTGCTAAAGGAGAGA  
 AGTTTGTGCATGCAGGAGGAGTTCTCGCGAGATGGCAAGGCTCTTGAACAGTTCTTGCAAG  
 AATACTTTGATGGCAACTTGAAGAGATACCTGAAGTCTGAACCCATCCAGAGTCCAACG  
 AAGGGCCTGTCAAGTTGTGGTAGCAGAGAATTTTGTGACATAGTGAATGAAGAAGATA  
 AGGACGTGCTGATTGAATTTTACGCCCTTGGTGTGGCCACTGTAAGAATCTGGAACCCA  
 AGTATAAAGAGCTGGGAGAAAAACTCAGCAAAGATCCAAATATTGTGCATAGCCAAGATGG  
 ATGCCACAGCCAATGATGTGCCTTCTCCATATGAAGTCAAGGGTTTTTCTTACCATCTACT  
 TCTCACCGCAACAAGAAGCTAACTCCAAAGAAGTATGAAGGTGGCCGTGAATTAATG  
 ATTTTATTAGCTATCTACAACGAGAAGCTACAAAACCCCTATAATTCAAGAAGAAAAAC  
 CTAAGAAGAAGAAGAAGGCACAAGAGGACCTCTAAAGCAACAGCCAAATGCACCACTTTA  
 TAAAAGGACTCTTACACCAGAGAAGGCAAAACAGAGAGGACAGAATGGATATACTCTGA  
 ATCCTGTAAATTTTCTTAACTGTTTCTTAGCTGCACTGTTTGAATAACAAGGACCA

GTTTTATGTTTTGTGGTTTTTGGGAGAAAATTTATTTGTGTTGGGAAGAATGTTGTGGGGGTGG  
GGGAATTGAGTTGGGGGGTTATTTTTCTAATTTTTTTTTGTACATTTGGAACAGTGACAAT  
AAATGTGCCCCCTTTATACTGTTCGTTTTTTTTCCCTCATGGGATGGAGAATCAGGGTCTC  
TAAACTGTAATACAGTAATAGATAGAAAGTGTGAGCTATGCTGTTCAATGCTGTAGCTA  
AACCAGATATGTTATCTCCTATAATCGCAACACTTGGGAGGTGCAGGCAAGAGATCTCAA  
GTTCAAGATCTTCCATGGCTACATAGCAGGTTTTGAGGCTAGCATCTTAAACAGGTTTGA  
TCTTTCAAAAAACAAAGAAAACCAGCTATGCTGATTCTGTAACCTTGAGACTGAATAGGTC  
CAGTTACCATCTCCAAATTGTATAATTTATTAGTTTTCTTTCTGTAGCTCAAGCTGTCCCT  
GAACTTGTGATGGTCTCCCTCCCTGGCCCTGAGATACTGAGATGACAGTTGTTTTCTAGCC  
TCATTCATGTCTAAAGGTGAATGCTTACTCTTGCCACACAGCCAAGCTTTCTGCATGTG  
CATGCCTCCTGAGGATGGTTCTCTGCCAGAAATGCCCTGTGTGAGTGACAGCAGTTTGG  
GGTCCATCCAATTTTAGGAATTTAGAACTGCTGGGTGCAGCTCTCCCAAATCATTG  
GGTTAGCCATTTACTTCCCTCCAGTGAACAGGGAAAACAGTATCAATCGCTGGCAAGAAC  
AAGAACCACAGAGATGTTTTCTTTTGAATGGATTAAAGTATTGCCCTCCTTTTTATAGCT  
AAAAAAAAAAAAAAAAAAAA

|         | Sequence             | Tm |
|---------|----------------------|----|
| Forward | TGTTGGAAGTACGGACGAAA | 60 |
| Reverse | CCGCCGAGCCCGTGT      | 61 |

Tapasin

>NM\_001025313 NM\_001025313 Mus musculus TAP binding protein (Tapbp),  
transcript variant 1, mRNA. 11/2006

CAAGGGGGTGGGTGCAGGGCGAGGAGTGGCTGGAGAGCTACAGACAGGGTTTTCGGCAACT  
CTGTTTTGGCCCCCTGTGGGCGGCGTTCCCTCCAACGCGCAGTCACGCCCTCACCTGACCAGA  
TCGGGGAATTTCCAGTTTCTCACCCCCAGCCTTAGAAGGAAAATGAAAGTGAAAGGGGAAG  
AAAAGACTTGGTAGGAGAGATCGTAGCACCATGAAGCCTCTGCTCCTGCTCGTTCGCTGTG  
GCACTGGGCTTAGCGACCGTCTCGTCTCCGTCGTCTCGGCTGGACCAGAGGCGATCGAGTGC  
TGGTTTCGTGGAGGATGCAGGTGGGGGTGGCCTGTCTAAGAAAACCTGCCACACTGCTACTG  
CGCCATGGACCCAGGGGACCGCCGCCCGCCCGCCGAGATCTTGACCCAAAGCTATACTTCAAG  
GTGGATGACCCGGCGGGAATGCTCCTGGCCGCCTTACAGGCGGTACCCCGCAGGCGCCTCC  
GCCCCACACTGCGAGATGAGCCGCTTTCATCCCGTTCCCTGCCTCGGCGAAGTGGGCTAGA  
AGTCTGAGTCCGGAGCAGAACTGCCCGCGGGCCCTGGACGGGGATTGGCTGCTGGTCAGC  
GTATCCAGCACTCTCTTACGCTTCCAGCCTTCCAGCCTGCTGCGACCACAGCCGGAGCCTCTGCGG  
GAGCCTGTGTCATCACCATGGCAACAGTGGTGTGACCGTCTCACCCATAACCCCTGCC  
CCTCGAGTCCAGCTGGGAAAAGGATGCAGTGTGCTGGACCTGCGCTTTCGCTACGCACCCTCC  
GCCCTGGAAGGTTCTCCCTCTCTGGACGCAGGCCCTCCTCCCTTTGGGCTGGAGTGGCGA  
CGCCAGCACAGGGGAAAAGGGTACCTGCTGTTGGCTGCCACCCCCGGGCTGGCCGGGAGA  
ATGCCACCAGCCAGGAAAAGGCTACGGCATTTCAGCTTGGGATGACGATGAGCCCTGG  
GGCCCGTGGACTGGGAATGGGACCTTCTGGCTTCCAGCCGTGAAGCCTTCTCAGGAGGGT  
GTCTACCTGGCTACGGTACACCTGCCCTACCTGCAAGGACAGGTCTCCCTGGAGCTGACT  
GTGCACAAGGCCCCAGAGTGTCTTAACACCAGCACCCGTTGTGTGGGCTGCCCCAGGA  
GAGGCACCCCCAGAAGTCTGTCTTGCATCCCCTTCTTCCCTGCGGAGGGTCTGGAG  
GTCAAGTGGGAGCTCAGAGGCGGCCAGGAGGAAGTTCTAGAAAAGGTTGAGGGGAAGACG  
TGGCTCTCCACCATCCGCCACCATTCCGATGGCTCTGTGACCCAGTCTGGGCACCTGCAG  
CTACCTCCAGTCACTGCCAAGCAGCATGGAGTTCACTATGTCTGTGCGGGTGTACCCTCT  
AGCCTGCCAGCATCGGGGCGCAGTGTGACGTACCCCTGGAGGTGGCAGGCTTCTCAGGG  
CCCTCCATCGAGGACGGCATCGGCCTGTTCCCTGTCTGCTTTTTCTCCTCCTCGGACTCCTC  
AAGGTGCTAGGCTGGCTGGTAGCTGCCTACTGGACCATTCTGAAGTCTCAAAGGAGAAG  
GCCACAGCTGCCAGCCTGACCATTCCAGGAACTCAAAGAAGTACAGTAAAGAAGTTCT  
CGTCTGTGGAAGCCACCTCATCTCTGGCCAGATGACTCCAGTAGCCCCCTGCCCCAGAA  
CAACAGCCTTCTCTCTTCTTCTCCCTCCATTGAATAGCTCGGATTTTTTTTTTTAAGGT  
TTTTTTGTTTTGTTCAATCTTTCTTTGTTTTGTTTTGTTTTGTTTTGTTTTGTTTTGTTTTG  
TAGCCTTGGCTGGCTGTCTGAAACCTCACCAAGCCAACCAGGCTGGCCTCGAAGTCCCA  
GAGATCCACCTGTCCCTCTGCCTCGGAGTGACAAAACGGCACTGGACACCATGCCTAGAGG  
TCTTTTTTTTTTTTTGGTTTTTTGGAGACAGGATTTCTCTGTATAGTCCCGGCTGTCTGGA  
ACTACTCTGTAGACCAGGCTGGCCTCGAACTCAGAAATCCGCTGCCTCTGCCTCCCAG  
GTGCTGGGATTAAGGCGTGCGCCACCACCGCTGGACTCGAACTAAACTTTTAAGATGAG  
AAAAAAGCGAGACTTAGCGCCACACTCATTTGATGCCACAGTCCGGAGGCAGAGGCAGT

GGATCTCTGACATTTCCATGCCAGCCTGATCTACAAATAGGGAGTTTCAGGTCTAGTCCGG  
 GTTACTTTGGCGGGGCTTTGTTGAGAGAACTAAATATAAGAACACACATGCGTAGAGTCCC  
 AGGGTTGAGAAGAACCAGTGTATGCGCCAGAGAGGCGGGTTTCATAACCTGTGGCTCACAA  
 CCCCCTTTAAGTCCATCGGAAATACCAGACATTAGGATTACACAACAGTAGTAAAGGCAGT  
 TACGAAGTAGCAAAGAAAATAATTTTACAACCTTGAACCTGCGTTAATGTTAAGAAGGTTGA  
 GAACCACTGGCCAGGGGATTAGGACGAAAGGTCTTCATAGCATCTTAAGATTCTAGAGAC  
 CTCAGGGACAGCCCACAGCAGTAGTCTAGAGACGGAAAGGTCCATGTGTCTCCCTCGCGG  
 ACTAAAGCCTACCTCTCCAGCTCTCCATTCTACCACAGCTTTTTCTTTTGCCTGGTCCAC  
 CTTTACCATCTCCGGGCTGGTGGGTCTCGGCCCTTTACGAATGTCCCCGTGTGGTTTCGT  
 CCTCTCCTGTTTCGCCGGTCTCGTGAGCTAATAAAGTCTTTCCGAGTTTC

|         | Sequence                | Tm |
|---------|-------------------------|----|
| Forward | ACTGCTCTGTCTTGCATCCCAC  | 60 |
| Reverse | TCTGAGCTCCCACCTTGACCTCC | 62 |

### MyD88

>NM\_010851 NM\_010851 Mus musculus myeloid differentiation primary response gene 88 (Myd88), mRNA. 2/2007

GGCTGGCAGGAGACTTAAGGGAAAGTAGGAAACTCCACAGGCGAGCGTACTGGACGGCACC  
 GGGGGCCCAGGGTTGCCTGCCATGTCTGCGGGAGACCCCCGCGTGGGATCCGGGTCCCTG  
 GACTCCTTCATGTTCTCCATAACCTTGGTTCGCGCTTAACGTGGGAGTGAGGCGCCGCTA  
 TCGCTGTTCTTGAACCCTCGGACGCCCCGTGGCGGCCGACTGGACCTTGCTGGCGGAGGAG  
 ATGGGCTTCGAGTACTTGGAGATCCGAGAGCTGGAACGCGCCCTGACCCACTCGCAGT  
 TTGTTGGATGCCTGGCAGGGGCGCTCTGGCGCGTCTGTCCGAGGCTGCTAGAGCTGCTG  
 GCCTTGTAGACCGTGAGGATATACTGAAGGAGCTGAAGTCCGCGCATCGAGGAGGACTGC  
 CAGAAATACTTAGGTAAGCAGCAGAACCAGGAGTCCGAGAAGCCTTTACAGGTGGCCAGA  
 GTGGAAGCAGTGTCCCAAAACAAAGGAAGTGGGAGGCATCACCACCCCTTGATGACCCC  
 CTAGGACAAACGCCGGAACCTTTTCGATGCCTTTATCTGCTACTGCCCAACGATATCGAG  
 TTTGTGCAGGAGATGATCCGGCAACTAGAACAGACAGACTATCGGCTTAAGTTGTGTGTG  
 TCCGACCGTGACGTCTGCCGGGCACCTGTGTCTGGTCCATTGCCAGCGAGCTAATTGAG  
 AAAAGGTGTGCCCGCATGGTGGTGGTTGTTTCTGACGATTATCTACAGAGCAAGGAATGT  
 GACTTCCAGACCAAGTTTGCCTCAGCCTGTCTCCAGGTGTCCAACAGAAGCGACTGATT  
 CCTATTAATAACAAGGCGATGAAGAAGGACTTTCCAGTATCCTGCGGTTTCATCACTATA  
 TGCAGTATACCAACCTTGCACCAAGTCTGTTCTGGACCCGCTTGCCAAGGCTTTG  
 TCCCTGCCCTGAAGATGACCCCTGGGAGCCCTAGGGCAGAGGGGAAGATGAGACTGATCG  
 GAGCCAGATTCTCTGATGCCGTCTGTCTACATCTTTGACTCCCCTGGGCTCAACCCGTG  
 TTCAATGATGACTGGCCTGAGCAACTAGGACTGCCTTTTCTCCCAGCCACCCATGCCTGT  
 GCACGCACCTCAGTACACACATGCCTCCTCGCACACACAGGCATCTGCATATGTGTGTTT  
 CCTTTGGGACAGCTCCCAAGGATAGCTGAGTGGAAAGAGTTCTATCATCAAGGGGGCCTGG  
 CCATCTCCCTGGACAAAAGTGGGGTGCCTTTGCTACAGGTAGTGGCACGGGCCTATAGTT  
 TCAGCATTTGGGAGGTAGAGGCAGGAGAATCAGGAGTTCAAGCTTATCCTTGGCAACACA  
 CCTAGTTTAAAGTTCAGCCTGGGCTACATGAGAGCCTACCTCCCCATCCCCTACCCCAG  
 AAAAGAAGGAAAATCTGGGGGCACTGTGGATTTCTCCTCTCTTTTCTCTACCTGTTGAAA  
 GCAAAGTCTAGGAAGGCCCAACATGATAGCATTTGGGCCCTTAGTAAGCTGAAGATAA  
 AAAGGAGAAGCTGTTTGGCTTCGCCCCACAAAGCAGCTGCAGGCTCAGCTGTTTTCTCCC  
 CAGCAGCGAGGTTTGCATCTTCTTATTCTTTTACGTTCTCTACCATAGAGGCAATGTCA  
 TGGTCCCTCTCAGGGTACACCCAGGGCCCTGAGTCCCCAAGAAAAGTGAAGTCTCCCCTCA  
 GTGTCTGGGGGAGGAATGAGGCCTCTGTGCACGGTCTCATGGGGCATTTCCTGCTTGAT  
 GTTGAAGCATTTTAAAGCAACCTGGGTCAAGTGTAAACCTCCTCCACCTGTGTTAGAGGTT  
 TCATGGGAATGTCAATAAAGAAAAGAAGGGCTCGTGTGTTGACTTAAAAAAAAAAAAAAAAA  
 AAAAAAAAAAAAAAAAAAAAAAAAAAAAAA

|         | Sequence                | Tm |
|---------|-------------------------|----|
| Forward | CCATACCCTTGGTCGCGCTT    | 63 |
| Reverse | GAGGGTTCAAGAACAGCGATAGG | 60 |

### TRIF (Ticam-1)

>NM\_174989 NM\_174989 Mus musculus toll-like receptor adaptor molecule 1 (Ticam1), mRNA. 2/2007

CTACAGCCAGGTCTGTGCTGCCGCCCTCCAGCATCTTTGCAGCAGGGGACGAGGCTGTGT  
GGGAGGCTGTTCGGTTCGGAACATGTCTCCACCCACCCACCCCTCTGTGGCTCCAGGCTTC  
ATTCTCCCCCATCCATGGATAACCCAGGGCCTTCGCTCCGTGGTGCCTTTGGCATTCTAG  
GTGCCTTGGAAAGGGACAGGCTGACCCACCTGAAACACAAGCTGGGGAGTCTGTGTTTCAG  
GCAGCCAGGAGTCAAAGCTTCTCCATGCCATGGTACTCCTGGCTCTGGGCCAGGACACGG  
AGGCCAGGGTCTCTCTGGAGTCTTGAAGATGAACACAGTAGCCAGCTGGTAGCCACC  
AGTGGGCAGACATGGAGACCACAGAGGGCCCTGAGGAGCCTCCAGACTTGTCTGGACGG  
TGGCTCGCCTGTACCACCTGCTGGCTGAGGAGAACCTGTGTCCGGCCTCCACAAGGGACA  
TGGCTTACCAGGTGGCCCTTCGTGACTTTGCCTCCAGGGTGACCACCAGCTGGGCCAAC  
TCCAGAATGAGGCCTGGGATCGGTGCAGTTTCAGATATCAAGGGGGACCCAGTGGTTTTCC  
AGCCACTCCATTCTCATCAGGGTTCCTGCAGCCACCTTCAGCATCCCCTGCAGTGACCA  
GAAGCCAGCCTCGTCCCATTGACACACCAGACTGGAGTTGGGGACATAACGTTACACTCCA  
CCAACAGCACTGCCTCACTGGCCAGCCACCTAGAGATCAGCCAGTCAACCCACTCTTGCCCT  
TTCTCTCTTTCACACCATGGAACCCATGGGCCAGCAAGCTATGTAACACACCCGCTGGACA  
CTCAGGAGCCTCAGCTTGTCCCTGAAGGCTGCCAAGAACCTGAGGAGATAAGCTGGCCTC  
CATCAGTGGAGACCAGTGTCTCCTTAGGGTTACCACACGAAATTAGCGTTCAGAGGTGT  
CTCCAGAGGAGGCTTCGCCCATCCTCCCTGACGCCCTGGCTGCTCCAGACACAAGTGTCC  
ACTGTCCCATTGAATGCACAGAGTTGTCTACAACTCCAGGTCTCCCTGACGTCCACCA  
CAGAAAGTGTGGAAAGCAGTGGCCTATTACAAGTCAGAGGTCACCTCAGGTTCCCTGTAG  
GAGATGATTCTCTGCAGAACACCACGTTCATCCAGCCCTCCTGCCAGCCACCATCCCTCC  
AAGCCTCCCCTAAGCTGCCTCCTTCCCCTCTGTCTCTGCTTCTCCCCGAGCAGCTACC  
CTGCTCCTCCAACCTCCACATCCCCTGTTTTGGACCACTCAGAAAACATCTGATCAGAAAT  
TCTATAACTTTGTGGTTATCCATGCCAGGGCTGATGAACAGGTGGCCCTACGTATTTCGGG  
AGAAGCTGGAGACCCTCGGGGTACCTGACGGGGCCACCTTCTGTGAGGAATTTTCAGGTGC  
CCGGGCGTGGTGAGCTGCACTGTCTCCAAGATGCCATCGATCACTCGGGGTTACGATCC  
TGCTCCTGACTGCTAGCTTTGATTGCAGCCTGAGCCTGCATCAAATCAACCATGCTCTCA  
TGAACAGCCTTACACAGTCTGGGAGGCAGGACTGTGTGATCCCCCTCCTCCACTTGAGT  
GTTCTCAGGCCCAGCTCAGCCAGATACAACCAGACTGCTCCACAGCATTGTGTGGCTGG  
ATGAACACTCCCCAATCTTCGCCAGAAAGGTGGCAAACACCTTCAAGACACAGAAGCTCC  
AGGCAGCAGCGGTACGCTGGAAGAAAGCGCAGGAGGCCAGAACCCTCAAGGAGCAGAGCA  
TACAGCTGGAGGCAGAGCGGCCAAAACGTGGCAGCCATATCTGCTGCCTACACAGCCTATG  
TCCATAGCTATAGGGCCTGGCAAGCAGAGATGAACAAACTTGGGGTGGCTTTTGGGAAGA  
ACTTGTCACTGGGGACTCCAACACCCAGCTGGCCCGGATGTCCACAGCCAATACCTTCTC  
ATCCTCAGGGTGGTACTCCAGTTTTCCCTATTCCCCACAGCCTCCATCCTTCCCTCAGC  
CTCCATGCTTCCCTCAGCCTCCATCCTTCCCTCAGCCTCCATCCTTCCCACTGCCTCCAG  
TCTCTTCCCCACAGTCCCAATCCTTTCCATCAGCCTCCTCCCCAGCCCCACAGACTCCAG  
GACCTCAGCCTCTCATTATTACCATGCCAGATGGTTTCAGCTGGGTGTCAACAATCACA  
TGTGGGGCCACACAGGGGCCAGTCATCTGATGACAAGACTGAGTGTTCGGAGAACCCCT  
GTATGGGCCCTCTGACTGATCAGGGCGAACCCTTCTTTGAGACTCCAGAGTGACCAGGTT  
GGACCCACCTAGATGGCTAGAGTGACAAGATTGGACTTCACCTGGGTCTTAAAATGAT  
AGTGGAGGAAGGGAACCTCGCCTGGGTCCCCAGAGTAGCCAGAGGACTTAGCTTGGGCTC  
CACAGTGGCTATTAGTTGGACCCAGCTTGGACCCAGAGGCAGGGAAGACCACACCTAT  
AAATCAGGCCTGGGAAACATGCAGAAACCCATTTGAAACAGACTGTGGGACTCCAATCTG  
AATCCTCTATGTGGACAGAGGATGATGGGGCCAGAGGCACCTCTGAGGTGCCCTCAGCGC  
AGCCTCGTAAACTTCATTCACTGTGACACATGCTGTTTCATAGGGTCTCTCTGGGGAGGAT  
GCGGTCCCAGGGGCACATAGGGAGGGTCTGTTTTTATAATAAAGTTATTGACAACCTGAGT  
CATAAAAATAAAAAAAAAAAAAAAAAAAAA

|         | Sequence            | Tm |
|---------|---------------------|----|
| Forward | GGGCGTGGTGAGCTGCA   | 62 |
| Reverse | CAGGATCGTGAACCCCGAG | 60 |

Delta-4

>NM\_019454 NM\_019454 Mus musculus delta-like 4 (Drosophila) (Dl14), mRNA.  
1/2007

CTCGCAGGCTAGGAACCCGAGGCCAAGAGCTGCAGCCAAAGTCACTTGGGTGCAGTGTAC  
TCCCTCACTAGCCCCTCGAGACCCTAGGATTTGCTCCAGGACACGTACTTAGAGCAGCC  
ACCGCCAGTCGCCCTCACCTGGATTACCTACCGAGGCATCGAGCAGCGGAGTTTTTGGAG  
AAGGCGACAAGGGAGCAGCGTCCCAGGGGAATCAGCTTTTCAGGAACTCGGCTGGCAGA

CGGGACTTGCGGGAGAGCGACATCCCTAACAAGCAGATTTCGGAGTCCCGGAGTGGAGAGG  
ACACCCCAAGGGATGACGCCTGCGTCCCGGAGCGCCTGTCGCTGGGCGCTACTGCTGCTG  
GCGGTACTGTGGCCGAGCAGCGCGCTGCGGGCTCCGGCATCTTCCAGCTGCGGCTGCAG  
GAGTTCGTCAACCAGCGCGGTATGCTGGCCAATGGGCAGTCCTGCGAACCGGGCTGCCGG  
ACTTTCTTCCGCATTTGCCTTAAGCACTTCCAGGCAACCTTCTCCGAGGGACCCTGCACC  
TTTGGCAATGTCTCCACGCCGGTATTGGGCACCAACTCCTTTCGTGCTCAGGGACAAGAAT  
AGCGGCAGTGGTCGCAACCCTCTGCAGTTGCCCTTCAATTTACCTGGCCGGGAACCTTC  
TCACTCAACATCCAAGCTTGGCACACACCGGGAGACGACCTGCGGCCAGAGACTTCCGCA  
GGAAACTCTCTCATCAGCCAAATCATCATCCAAGGCTCTCTTGCTGTGGGTAAGATTTGG  
CGAACAGACGAGCAAAATGACACCCTCACCAGACTGAGCTACTCTTACCGGGTCATCTGC  
AGTGACAATACTACTATGGAGAGAGCTGTTCTCGCCTATGCAAGAAGCGCGATGACCACTTC  
GGACATTATGAGTGCACAGCAGATGGCAGCCTGTCTGCGCTGCGGGCTGGACTGGGAAG  
TACTGTGACCAGCCTATATGTCTTTCTGGCTGTCATGAGCAGAATGGTTACTGCAGCAAG  
CCAGATGAGTGCATCTGCCGTCCAGGTTGGCAGGGTTCGCTGTGCAATGAATGTATCCCC  
CACAATGGCTGTGCTCATGGCACCTGCAGCATCCCCCTGGCAGTGTGCTGCGATGAGGGA  
TGGGGAGGTCTGTTTTGTGACCAAGATCTCAACTACTGTACTCACCCTCTCCGTGCAAG  
AATGGATCAACGTGTTCCAACAGTGGGCCAAAGGGTTATACTGCACCTGTCTCCAGGC  
TACACTGGTGAGCACTGTGAGCTGGGACTCAGCAAGTGTGCCAGCAACCCCTGTGAAAT  
GGTGGCAGCTGTAAGGACCAGGAGAATAGCTACCCTGCTGTGTCCCCCAGGCTACTAT  
GGCCAGCACTGTGAGCATAGTACCTTGACCTGTGCGGACTCACCTGCTTCAATGGGGGC  
TCTTGCCGGGAGCGCAACCAGGGGTCCAGTTATGCCTGCGAATGCCCCCCCAACTTTACC  
GGCTCTAACTGTGAGAAGAAAAGTAGACAGGTGTACCAGCAACCCGTGTGCCAATGGAGGC  
CAGTGCCTGAACAGAGGTCCAAGCCGAACCTGCCGCTGCCGGCCTGGATTTCACAGGCACC  
CACTGTGAACTGCACATCAGCGATTGTGCCCGAAGTCCCTGTGCCACGGGGGCACTTGC  
CACGATCTGGAGAATGGGCCTGTGTGCACCTGCCCGCTGGCTTCTCTGGCAGGCGCTGC  
GAGGTGCCGATAACCCACGATGCCTGTGCTCCGGACCCTGCTTCAATGGGGCCACCTGC  
TACACTGGCCTCTCCCCAAACAACCTTCGTCTGCAACTGTCTTATGGCTTTGTGGGCAGC  
CGCTGCGAGTTTCCCGTGGGCTTGCCACCCAGCTTCCCCTGGGTAGCTGTCTCGCTGGGC  
GTGGGGCTAGTGGTACTGCTGGTGTGCTGCTGCTGATGGTGGTAGTGGCTGTGCGGCAGCTG  
CGCTTCCGAGGGCCCGATGACGAGAGCAGGGAAGCCATGAACAATCTGTGAGACTTCCAG  
AAGGACAACCTAATCCCTGCCGCCAGCTCAAAAAACACAAACCAGAAGAAGGAGCTGGAA  
GTGGACTGTGGTCTGGACAAGTCCAATTTGTGGCAAACCTGCAGAACCACACATTGGACTAC  
AATCTAGCCCCGGGACTCCTAGGACGGGGCAGCATGCCTGGGAAGTATCCTCACAGTGAC  
AAGAGCTTAGGAGAGAAGGTGCCACTTCCGGTTACACAGTGAGAAGCCAGAGTGTGGAATA  
TCAGCCATTTGCTCTCCAGGGACTCTATGTACCAATCAGTGTGTTTGATATCAGAAGAG  
AGGAACGAGTGTGTGATTGCCACAGAGGTATAAGGCAGGAGCCTACTCAGACACCAGCT  
CCGGCCAGCAGCTGGGCCTTCCCTTCTGCATTGTTTACATTGCATCCTGTATGGGACATC  
TTTAGTATGCACAGTGTCTGCTGCGGAGGAGGAGGGAATGGCATGAACTGAACAGACTG  
TGAACCCGCCAAGAGTTGCACCCGGCTCTGCACACCTCCAGGAGTCTGCCTGGCTTCAGAT  
GGGCAGCCCCGCCAAGGGAACAGAGTTGAGGAGTTAGAGGAGCATCAGTTGAGCTGATAT  
CTAAGGTGCCTCTCGAACTTGGACTTGTCTGCCAACAGTGGTCATCATGGAGCTCTTGA  
CTGTTCTCCAGAGAGTGGCAGTGGCCCTAGTGGGTCTTGGCGCTGCTGTAGCTCCTGTGG  
GCATCTGTATTTCCAAAGTGCCTTTGCCAGACTCCATCCTCACAGCTGGGCCCAAATGA  
GAAAGCAGAGAGGAGGCTTGGCAAAGGATAGGCCTCCCGCAGGCAGAACAGCCTTGGAGTT  
TGGCATTAAAGCAGGAGCTACTCTGCAGGTGAGGAAAGCCCAGGAGGGGACACGTGTGAC  
TCCTGCCTCCAACCCAGCAGGTGGGGTGCCACCTGCAGCCTCTAGGCAAGAGTTGGTCC  
TTCCCCTGGTCCCTGGTGCCTCTGGGCTCATGTGAACAGATGGGCTTAGGGCACGCCCTT  
TTGCCAGCCAGGGGTACAGGCCTCACTGGGAGCTCAGGGCCTTCATGCTAAACTCCCAA  
TAAGGGAGATGGGGGGAAGGGGCTGTGGCCTAGGCCCTTCCCTCCCTCACACCCATTTT  
TGGGCCCTTGAGCCTGGGCTCCACCAGTGCCCACTGTTGCCCGAGACCAACCTTGAAGC  
CGATTTTCAAAAATCAATAATATGAGGTTTTGTTTTGTAGTTTATTTTGGAACTAGTAT  
TTTTGATAATTTAAGAATCAGAAGCACTGGCCTTTCTACATTTTATAACATTATTTTGTAT  
ATAATGTGTATTTATAATATGAAACAGATGTGTACATAAAAAAAAAAAAAAAAAAAAAA  
AAAAAA

|         | Sequence                | Tm |
|---------|-------------------------|----|
| Forward | TCCCGCAGGCAGAACAGC      | 62 |
| Reverse | GCTTTCCTCACCTGCAGAGTAGC | 60 |



Jagged-1

>NM\_013822 NM\_013822 Mus musculus jagged 1 (Jag1), mRNA. 1/2007

GCCGCCGCCGCTGCTAGCGCTGGTGTCTCCCGCCGAGGCTGCCGCGTCCGGAGTGCCCGTG  
GCGCGCGGGCGCAGCGATGCGGTCCCCACGGACGCGCGGGCCGGCCCGGGCGCCCCCTGAGT  
CTTCTGCTCGCCCTGCTCTGTGCCCTGCGAGCCAAGGTGTGCGGGGCTCGGGTCAGTTT  
GAGCTGGAGATCCTGTCCATGCAGAACGTGAATGGAGAGCTACAGAATGGGAACTGTTGT  
GGTGGAGTCCGGAACCTGGCGACCGCAAGTGACCCGCGACGAGTGTGATACGTAACCTT  
AAAGTGTGCCTCAAGGAGTATCAGTCCCAGCTACTGCCGGGGGACCCTGCAGCTTCGGC  
TCAGGGTCTACGCCTGTTCATCGGGGGTAAACACCTTCAATCTCAAGGCCAGCCGTGGCAAC  
GACCCTAATCGCATCGTACTGCCTTTCAGTTTTCGCTGGCCGAGGTCTACACTTTGCTG  
GTGGAGGCTGGGATTCCAGTAATGACACTATTCAACCTGATAGCATAATTGAAAAGGCT  
TCTCACTCAGGCATGATAAACCCCTAGCCGGCAATGGCAGACACTGAAACAAAACACAGGG  
ATTGCCCACTTCGAGATCAGATCCGAGTGCCTGTGATGACCACTACTATGGCTTTGGC  
TGCAATAAGTTCTGTCTGCCAGAGATGACTTCTTTGGACATTATGCCTGTGACCAGAAC  
GGCAACAAAACCTTGCATGGAAGGCTGGATGGGTCTGATTGCAACAAAAGCTATCTGCCGA  
CAGGGCTGCAGTCCCAAGCATGGGTCTTGTAAACTTCCAGGTGACTGCAGGTGCCAGTAC  
GGTTGGCAGGGCCTGTACTGCGACAAGTGCATCCCGCACCCAGGATGTGTCCACGGCACC  
TGCAATGAACCTGGCAGTGCCTCTGTGAGACCAACTGGGGTGGACAGCTCTGTGACAAA  
GATCTGAATTACTGTGGGACTCATCAGCCCTGTCTCAACCGGGGAACATGTAGCAACACT  
GGCCTGACAAAATACCAGTGTCTCTGCCAGAGGGCTACTCGGGCCCCAACTGTGAAATT  
GCTGAGCATGCTTGTCTCTGACCCCTGCCATAACCGAGGCAGCTGCAAGGAGACCTCC  
TCAGGCTTTGAGTGTGAGTGTCTCCAGGCTGGACTGGCCCCACGTGTTCCACAAAACATC  
GATGACTGTTCTCCAAATAACTGTTCCCATGGGGGCACCTGCCAGGATCTGGTGAATGGA  
TTCAAGTGTGTGCCCCGCCCCAGTGGACTGGCAAGACTTGTGAGTTAGATGCAAAATGAG  
TGCGAGGCCAAAACCTTGTGTAATGCCAGATCCTGTAAGAATCTGATTGCCAGCTACTAC  
TGTGATTGCCTTCTGGCTGGATGGGTGCAAACTGTGACATAAAATATCAATGACTGCCTT  
GGCAGTGTGAGAATGACGCCTCTGTGCGGATTTGGTTAATGGTTATCGCTGTATCTGT  
CCACCTGGCTATGCAGGCGATCACTGTGAGAGAGACATCGATGAGTGTGCTAGCAACCCC  
TGCTTGAATTTGGGGTCACTGTGAGAATGAAATCAACAGATTCCAGTGTCTGTCTCCACT  
GGTTTCTGTGAAACCTCTGTGACGCTGGACATCGATTACTGCGAGCCCAACCCCTTGCAG  
AATGGCGCCCAAGTGTACAAATCGTGCCAGTACTTCTGCAAGTGCCTCCGAGGACTAT  
GAGGGCAAGAAGTGTCTCACACCTGAAAGACCACTGCCGTACCACCACCTGCGAAGTGATT  
GACAGCTGCACTGTGGCCATGGCCTCCAACGACACGCCTGAAGGGGTGCGGTATATCTCT  
TCTAACGTCTGTGGTCCCCATGGGAAGTGAAGAGCCAGTCCGGAGGCAAATTCACCTGT  
GACTGTAACAAAAGGCTTACCAGGCACCTACTGCCATGAAAATATCAACGACTGCGAGAGC  
AACCCTGTAAAAACGGTGGCACCTGCATCGATGGCGTTAACTCCTACAAGTGTATCTGT  
AGTGACGGCTGGGAGGGAGCGCACTGTGAGAACAACATAAATGACTGTAGCCAGAACCCT  
TGCTACTACGGGGTACATGTGAGACCTGGTCAATGACTTTTACTGTGACTGCAAAAAT  
GGCTGGAAAGGAAAGACTTGGCATTCCCCTGACAGCCAGTGTGACGAAGCCACGTGTAAT  
AATGGTGGTACCTGCTATGATGAAGTGGACACGTTTAAAGTGCATGTGTCCCGGTGGCTGG  
GAAGGAACAACCTGTAATATAGCTAGAAAACAGTAGCTGCCTGCCGAACCCCTGTGATAAT  
GGAGGTACCTGCGTGGTCAATGGAGACTCCTTACCTGTGTCTGCAAGAAGGCTGGGAG  
GGCCTATTTGTAATCAAAAATACCAACGACTGCAGTCCCATCCTTGTACAATAGCGGG  
ACCTGTGTGGACGGAGACAACCTGGTATCGGTGCGAATGTGCCCGGGTTTTGCTGGGCCA  
GACTGCAGGATAAACATCAATGAGTGCAGTCTTCCCCTTGTGCCTTTGGGGCCACCTGT  
GTGGATGAGATCAATGGCTACCAGTGTATCTGCCCTCCAGGACATAGTGGTGCCAAGTGC  
CATGAAGTTTCAAGGCGATCTTGCATCACCATGGGGAGAGTGTACTTTGATGGGGCCAAG  
TGGGATGATGACTGTAACACCTGCCCAGTGCCTGAATGGACGGGTGGCCTGCTCCAAGGTC  
TGGTGTGGCCCCGAGACCTTGCAGGCTCCACAAAAGCCACAATGAGTGCCTCCAGTGGGCG  
AGCTGCATCCCGGTCTGGATGACCAGTGTTCGTGCGCCCCCTGCACTGGTGTGGCGAG  
TGTCCGTCTCCAGCCTCCAGCCAGTGAAGACCAAGTGACATCTGACTCCTATTACCAG  
GATAACTGTGCAAAACATCACTTTCACCTTTAAACAAAAGAGATGATGTCTCCAGGTCTTACC  
ACCGAACACATTTGAGCGAATTGAGGAATTTGAATATCCTGAAGAATGTTTCTGCTGAA  
TATTCGATCTACATAGCCTGTGAGCCTTCCCTGTGAGCAAAACAATGAAATACACGTGGCC  
ATCTCTGCAGAAGACATCCGGGATGATGGGAACCCCTGTCAAGGAAATTAACCGATAAAAATA  
ATAGATCTCGTTAGTAAACGGGATGGAAACAGCTCACTTATTGCTGCGGTTGAGAAAGTC  
AGAGTTGAGAGGCGTCTCTGAAAAACAGAACAGATTTCTGGTTTCTCTGCTGAGCTCT  
GTCTTAAACAGTGGCTTGGGTCTGTTGCTTGGTGACAGCCTTCTACTGGTGTGTAAGGAAG  
CGGCGGAAGCCCAGCAGCCACACTCACTCCGCCCCCGAGGACAACACCACCAACAATGTG

CGGGAGCAGCTGAACCAAATCAAAAACCCCATCGAGAAACACGGAGCCAACACGGTCCCC  
 ATTAAGGATTACGAGAACAAAACTCGAAAATGTCAAAAATCAGGACACACAACCTCGGAA  
 GTGGAGGAGGATGACATGGATAAACACCAGCAGAAAGTCCGCTTTGCCAAACAGCCAGTG  
 TATACGCTGGTAGACAGAGAGGAGAAGGCCCCAGCGGCACGCCGACAAAACACCCGAAC  
 TGGACAAAATAAACAGGACAACAGAGACTTGGAAAAGTGCCAGAGCTTGAACCGGATGGAA  
 TACATCGTATAGCAGACAGTGGGCTGCCGCCATAGGTAGAGTTTGGAGGCACCGCGGGG  
 TTGTAGTTTCTTTAACTGTTGTCTATTCCAGTCTGAGGCTGTTGTTGACTTAGAATCC  
 TGTGTTAATTTAAGTTTTCGACAAGCTGGCTTCCACTGGCACTGGTAGTTTCTGTGGTTGG  
 CTGGGAAATTGAGTGCAGCGCTCTCACAGCTATGCAAAAAGTAGTGAATGTGCCCTGGTG  
 TCCATTTCCCTGCCGACACATCGGGCTCCAGGAGCTGCCAGCCCTAGGCCTGGAG  
 CTTCCACATCTGCCAGCGTCTAATGGTGTATGGCAGCCTTAGGATCATAGTTTTATTTA  
 TATTTATTGACTCTTGAGTTGTTTTTGTATATTGGTTTTTATGATGACGTTTCGAGTAGTTC  
 TGTATTTGAAAAGTGCTTTGCAGCTCAGAACCACAGCAACTATCACAAATGACTTTATTA  
 TTTATTTTTTTTTTATTGTATTTTTTGTGTTGGGGGAGGGGGGATTTGATGTCAGCAGTTG  
 CTGGTAAAATGAAGAATTTAAAGAGGAAAAATGTGTCAAAGTAGAATTTTTGTATAGTTA  
 TGTAATAAATCTTTTTTTTATTAATCACTGTGTATATTTGATTTATTAACCTTAATAATCA  
 AGAGCCTTAAACATCATTCCTTTTTTATTTATATGTATGTGTTTAGAATTGAAGGTTTTT  
 GATAGTGTGTAAAGCATATGACTCTTTTTTTTTGTGAACTTTTCTCATAACGTGTTGCCTG  
 TAAGCCAAAATTAAGGTGTTTGGAAATAGTTTTCTCTTGAAGGATGGGATAGGCTTTTTC  
 CCCTGGGAATACTGATGGAATTTTTTTTTTTTTTTTTTTTTTTTTTTGTACGACGTGAGGTGTT  
 GAAACACTTCCCTTGATAGCATCACTTTAAGTTTAAAGACACATTTTAAAGGACTGACTGAGG  
 CAGATTAAGAATTGCTCTAGAACAGGTTTCTTTCTTTCTTTTTTTTTTTTTTTTTTTCTC  
 TTTCTTTCTGCTTTAGACTTGAAGAGACAGGCAGGCGATCTGCTACAGAGCAGTCAG  
 TTTTAAGGGAACAGACTGAGCTATATGACTTATGTAGCCAGAAAAGTACTGGTTGAATCT  
 CATTACAAATATCAAATTAATTGTGTGAAGTTGGAAGCATCCAATCTTACTTTGTAAAT  
 TCTGATTTATTTTACCATTTCGTTATGTAATGCTGAACCACCTGTAGACTTGATTTTCGTT  
 GTTGTGTCTACTGCATTTAGGGAGTATTCTCATAAGCTAGTTGAATACTTGAACCGTAA  
 AATGTCCAGTTAGATCACTGTTTAGATTTGCCGTAGAGTACACTGCCTGCCTTAAGTGAG  
 GAAATCAAAGTGTCTATTACCAAGCTCAAGATCAAAAAAAGGCTTATAAAAACAGAGTGAT  
 CCAGGTTACCACCGGACTGGGGAGATACTTGGTGTGTTGTTCTATTAGTGTATATGAA  
 CAGAAAATACATCTTTGATGTGTTGTTCTGGCAATAAAATTTGAAAAGTAATATTTATT  
 AAATTTTTTTGTATGAAAAA  
 AAAAAAAAAAAAAAAAAAAAAAAAAAAAAAAAAAAAAAAAAAAAAAAAAAAAAAAAAAAAAAAAAA  
 AAAAAAAAAAAAAAAAAAAAAAAAAAAAAAAAAAAAAAAAAAAAAAAAAAAAAAAAAAAAAAAAAA

|         | Sequence              | Tm |
|---------|-----------------------|----|
| Forward | TCAATCTCAAGGCCAGCCGT  | 62 |
| Reverse | CAGGCGAAACTGAAAGGCAGT | 60 |

Syk

>NM\_011518 NM\_011518 Mus musculus spleen tyrosine kinase (Syk), mRNA. 2/2007  
 CCACTTCCCTAGTTACAGACACCCTAACAGCAGGAAACCTCCACTTGCTCTCCTCTGC  
 CTTCTCTCCATTGCAGCCATTCCCATTTTCAAGACTGCCAGTCTGGTCTTTCAACGTTT  
 CATGCTGCCTGGTGCCCGGGAGCCAGGCCCTTCTGTGACTCCAGGACAGGAAGGTACTTC  
 TCCATACACTTCCCAGAACTCTGAAGGGGTGCAGACATGGCGGGAAGTGTGTGGACAGC  
 GCCAACCACCTGACCTACTTTTTTGGCAACATCACCCGGGAAGAGGCTGAAGACTACCTG  
 GTCCAGGGAGGCATGACCGATGGGCTCTACCTGCTACGCCAGAGCCGCAATTACCTGGGT  
 GGTTTTGTCTTTGTGCGGTGGCTCACAAACAGGAAGGCACACCACTACACCATCGAGAGGGAA  
 CTTAATGGCACCTACGCCATCTCCGGGGGAGGGCCCATGCCAGCCAGCAGACCTCTGC  
 CATTACCACTCCCAGGAACCTGATGGCCTTATCTGCCTCCTTAAAGAAGCCCTTCAACCGG  
 CCCCCGGGAGTACAGCCCAAGACCGGACCCTTTGAGGACCTGAAGGAGAACCTCATCAGG  
 GAATATGTGAAACAGACCTGGAACCTTCAAGGGCCAGGCTCTGGAGCAAGCCATCATCAGC  
 CAGAAGCCACAGCTGGAGAAGCTGATCGCCACCACGGCCCATGAGAAGATGCCCTGGTTT  
 CATGGCAACACTCTCAGAGATGAATCAGAGCAGACGGTCCCTCATAGGGTCAAAGACCAAT  
 GGAAAATTCCTGATCAGGGCCAGAGACAACAGCGGCTCCTATGCTCTGTGCTGCTGCAC  
 GAAGGGAAAGTATTGCACTACCGCATTGACAGGGACAAGACCGGGAAGCTCTCCATTCTT  
 GAGGGGAAGAAGTTTACACCTCTGGCAGCTAGTGGAACATTAATCTTACAAGCCAGAT  
 GGGCTACTAAGAGTCTCACGGTACCATGCCAAAAGATTGGTGCACAGATGGGCCACCCA  
 GGAAGCCCAAATGCCATCCCGTACTTGGTACCAGGGTGAATAATCTCAAGGATCAAAA  
 TCCTACTCCTTCCAAAGCCTGGCCACAAAAGCCTGCCCCACCCCAAGGGAGCCGTCCA  
 GAGAGCACTGTGCTTCAACCCCTATGAGCCAACGGGAGGGCCCTGGGGCCAGACAGA

GGCCTTCAGAGAGAAGCCCTGCCCATGGACACAGAGGTGTACGAGAGCCCTTATGCTGAC  
CCTGAAGAGATCCGGCCCCAAGAGGTCTACCTGGACAGGAGCCTGCTGACCCTGGAGGAC  
AATGAACTGGGCTCCGGTAACCTTCGGGACTGTGAAAAAGGGATACTACCAAATGAAAAA  
GTTGTGAAAACCGTGGCTGTGAAAATCCTGAAGAACGAGGCCAACGACCCGGCTTTGAAG  
GACGAGCTGCTGGCAGAGGCCGAACGTGCATGCAGCAGCTGGACAACCCCTACATTGTGCGC  
ATGATCGGAATCTGCGAGGCGGAGTCTGGATGCTGGTGTGATGGAGATGGCGGAGCTGGGG  
CCGCTCAACAAGTACCTGCAGCAGAACAGGCACATTAAGGATAAGAACATCATAGAGCTG  
GTTACCAGGTTTTCCATGGGGATGAAGTATTTGGAAGAGAGCAACTTTGTGCACAGAGAT  
CTGGCTGCGCGGAACGTGCTTCTGGTACACAGCACTATGCCAAGATCAGCGATTTTCGGT  
CTTTCCAAAGCCCTGCGTGTGATGAAAACTACTACAAGGCCAGACCCACGGGAAGTGG  
CCCGTGAAGTGGTACGCCCCCGAATGCATCACTACTACAAGTTCTCCAGTAAGAGTGC  
GTCTGGAGCTTCGGAGTCTGATGTGGGAAGCGTTCTCCTATGGGCAGAAGCCCTACAGA  
GGGATGAAAAGGGAGCGAAGTGACCGCCATGCTGGAGAAAAGGAGAGCGGATGGGGTGCCCT  
GCAGGATGCCCGAGAGAGATGTACGACCTGATGAACCTGTGCTGGACTTACGATGTGGAG  
AACAGGCCAGGATTACAGCTGTGGAAGTGGAGCTTCGCAATTACTACTACGACGTGGTT  
AACTAACAGCTCCGGCGCCTGTCCGTGCACACCACGGATTCCCAAGCGATCACAGGAAAT  
TCATTACAGATGAACTGGCTCTCAGAGTTTCATCTCCCTCTGCCCGGAGTGAGAGCTAAGC  
TAACATAGGACTCACCCCTCACAACAGGTCTGGTGCCAGAGACAGACAAGCAGCAAGACC  
TTGGGGCCTGTGGAGTCGTCTCTCTGGTCTTTGTTTCCATCTGTGTGGTCTTCGCTATCG  
GTCACGTTTGGGAGCCATTTCCAAATTCTCTTGACATCATTCCGTTCTCTGGGTCCAGG  
ATTTTCAGTGTCCCTGAAGATCAGAAAAGAAAAGTGCTTTGCCACTCCAGCAAAGGACAT  
AAAGAGAAACCTCGCTGGTGCAGTCAGCAAGCTGGAAGGTGGTTAAGGACAATGACAAGC  
CTGGACACTGGTTTTACTCTCAGCGCTGAGACAGAGATACTGTGTGGATGACATGCTGAG  
ATGTGCTGGCTTGGCTGACACGCCCTGGAGTCCACCTCCCTGCAGTCGTGTGTGTTTGC  
TGGAGGAGGTGTGAATAACGTTCTGTGTGGAGGCTGCCGGGGGAGGTGAGCTCCCATGAT  
CCTCTGCGACTGAGCAGAAGTGTGTGAGGCAAGGGTCAGACTCCCTCTCTGCAGAGGGA  
ATGCATCCAGGACTCCTTGTGTGCTGCCACTAAAAAATTGCCAACCAGCAACTTAAGGGAG  
GAATGGCTCATTTGAGCTCACAGTTGGAGGGGATAGGCCATCATGGTGGAAAAGACAACA  
GGCAGGAAAGGCTTGGTGGCATGAAAAGGAAGCTGGAAGGTCACATGGCATCCACATTTCA  
GGAAACAAAGAAATGAACAGGAAGTGGGGCCAGGCTATAAGGCCCTAAAGGCCACCTCCGG  
TGACCCAGTTCCCTCAGATCCATCTATCAAAGATTCCACAGGCCTCTCAGACACTGAATG  
CCAACAGCTGGGGACCAAATGTTCAAGCACACAAGGTGCAGTGCCAGGCAGGGGCTTCC  
TGAATGATTACACAGTGTGGTATCCTGACAGAGCGGGTGGACCATCTCAGGTCTGTCCCC  
TTATGAGCCCCGTTTACCATCCAGATTCCCCCTTGGGACCCCCCTCATCTGGATCATTTC  
CCCTCCCCCAGGCCCTATCTCCAAACACCTAGGTACTAAGTGAACCTAGGTACTAAGTC  
TTCAACACATGAATTTGAGGGGACACATTCATACTGGAGCCGATGGCAGCCTGGTGACC  
AAGACCATCTCAGGATGAGTTTCTGAATGGAATCTTCATTTCGCCATAAAAACCAGAGATGT  
GACCTTCCCCACAAGGAAGCCTTGCTAAGTGCAGCATTGAGCTGAGGACACACAAGCTGA  
GAATTTCCCTCTGTCTCCTAGCCTTGGCTAACTACTGACCATAACCCGAATGTCACCC  
ATTCACGGCACTTTTGTGAGGACCTAAAAGCTACAAAGGCTGCATAGCCTTCCATCTAG  
GTCTAGGGACATGTACAGATGGGAGCATCTCACCTTCACCTCTGAGACACTGGGACATTC  
ACAGCCAGGGATGGTACAGGAGTCCCTGCTGGTGGTGGGCTCAATGAACAGAGACGATGG  
TGAAATGGGTGCCTCTCTTTAGACCAGTGGTTCTCAACCTTCCCTAATGCTGAGATCTTTC  
AATACAGGTCCCTGCGTTGTGGCGACTCCCAACCATGAAGTTATTTTGTGCTACATTGT  
CACTGTAATTTTGTACTATGATGAATCGTAGTGTAGATATCTGATATGCAGGATATCGG  
ATATGTAATATCTGGTATGCAGGATATGTGAAATGAGGGCACATCCACAGGTTGGGAA  
CCACTGCCTTTGATAGGGAGGCACATGCTTAGAGCATGGTTAGGAAGTATTTAGAAGCT  
ATTTGGTGTGTCTTGAATTTGTGTTAGTAGTCAACCGTCTGTGGAGGGAAGGAAGGGGG  
TGGAGGAAATCCCTGTATGTTGAATTCATTGAGCAGACCTGCAGAACACAGCCTTGGTGA  
GGAAGTCCCATGGGTGAGACCACCTGTAGATTTAGTCAGGAGAGGAAGGGCCACTGTATA  
GTTATGGAGACAGGACTGTCTGCTCTGAGCAAGAAGTTCTCTGCTGAGCTCCTAGCCTAC  
CTTCCCTTGTCCCCAGGGCTATAGAAAGGCCACCTCGAAGACCAGGGAGCATGTGTGAGA  
AGTCTGTGGAGGCCTCTGCCTTCTTCCCTGGCCTCTCTAGCAGTGCCTCTCCTTCCAGGG  
ATTTGGGACTGACCGTTATCTGGCTATGACTGAGCAGAGTGGAGGGATGGGCTTTGCCCC  
CCTTCAGAAAGCCGAAACCGGTTCCCATGTGCAGAGTCACATGTGGCCATCGACCAGGGC  
TCTCATCTGGTGAACACTGTGTCTTACTGTCAAGATTAATTCTCTCCCTGGGCCACTGA  
GGAGGGCAGATGGCAAGAGGATCCTCCCTAGAGGATTTAGACTATGAATGCCCACTAAAT  
TTGCAAGGTGAGAACTAGCCAAGGTCTTCTCAGGCATCTATCCTTAACTTGGTCTCTC  
CACAAGCTGCCTCTGATGCTCCGAGCCCCCTTCTGCCTGGCAGCTGGGCTCCCTGTGTGCT

TTTACCTATGACCCTTGGTCAGCAGAGTACAAGGAGCACCTAAGCTGCCTCGCCACCTCC  
 CACTGACTGCAAACACCACATACCTCATGCGGAACCGAATGTCTCTCCAGTAAACACCCC  
 AGCCAGCCATTCATAAAAACCTGTCTCTGTGTGCGCTGGGACATGTCTCCCTGTACCCC  
 GGGCCTGCTTTGTGTGCCAGACAGTGACTCCACAGGGATGCCAGGTCTGTGATTGCATTG  
 CTCTTGCAGAGGGAAGCCCTCGGTTGTCTTCTCTGGGAATGCTGCCACCCAGAGCAGC  
 ACACAGTGATTCCCTGTTATTTTCAGAAATATTTTTAAATAAAGATCTACTATTAGTCTTG  
 TGAAAAAAAAAAAAAAAAAAAAAAAAAAAAAAAAAAAAAAAAAAAAAAAAAAAAAAAAAAAA

|         | Sequence               | Tm |
|---------|------------------------|----|
| Forward | GTGGAAGCTGAGGCTTCGCAAT | 60 |
| Reverse | GGACAGGCGCCGGAGCT      | 63 |

Card-9

>BC065797 BC065797 Mus musculus caspase recruitment domain family, member 9,  
 mRNA (cDNA clone IMAGE:573639), complete cds. 12/2006

GGACACCCATACTGCTGTTCACTGCAAAGAAGTCTTCCACTCACCTGGCTACAAAGGGGT  
 TGTACCCACACGCTCAGTCATCTCGGAGTCCAGCAGACCCACGGCCAGCTAGCTATGCT  
 CCACACCTGCTGGAGTCCCAGGGCTGCCGTGGTAAGGCCACGGTGTCCAGCTGCCCCGCC  
 CGTTGTCCAGCTGCCGGCCCCGTTCTTCTCTAGGGCATGGGGCCCAGCAGCAGCGAGCC  
 CCCGGAGAAGGAGCGGGCGGCCTCAAGGAGAGCTTCGAGAACTACCGCAGGAAGCGGGC  
 GCTCCGCAAGATGCAGAACAGCTGGCGGCAGGGAGAAGGGGATCGCGGAATACGACAGG  
 CAGCGACAACACCGACACCGAGGGCTCCTAGCGAACCAGCGCCGAGGCTGAGCATCTGTGG  
 AATTGTGAAAGGATGCTGCGGTTTTTTTTTTTTTTTTTTTTTTTTTTTTTTTACTGTATTAGAATT  
 AGAAAATGCAACTAAATAAAATAATCACCGAGCTGAAAAAAAAAAAAAAAAAAAAAAAAAAAA  
 AAAAAAAAAAAAAAAAAAAAA

|         | Sequence            | Tm |
|---------|---------------------|----|
| Forward | AGAAGGGGATCGCGGA    | 60 |
| Reverse | TAGGAGCCCTCGGTGTCCG | 62 |

ICAM-1

>NM\_010493 NM\_010493 Mus musculus intercellular adhesion molecule (Icam1),  
 mRNA. 2/2007

GCGCCGCCCCGCTCAGTCTGCACCCAGTGCTAGTGCTGAGCTCCGCTGCTACCTGCACTT  
 TGCCCTGGCCCTGCAATGGCTTCAACCCGTGCCAAGCCCACGCTACCTCTGCTCCTGGCC  
 CTGGTCACCGTTGTGATCCCTGGGCTGGTGTGCTCAGGTATCCATCCATCCCAGAGAA  
 GCCTTCTGCCCCAGGGTGGGTCCGTGCAGGTGAACTGTTCTTCTCATGCAAGGAGGAC  
 CTCAGCCTGGGCTTGGAGACTCAGTGGCTGAAAGATGAGCTCGAGAGTGGACCCAAGTGG  
 AAGCTGTTTGTAGCTGAGCGAGATCGGGGAGGACAGCAGTCCGCTGTGCTTTGAGAAGTGT  
 GGCACCGTGCAGTCGTCCGCTTCCGCTACCATCACCGTGTATTTCGTTTCCGGAGAGTGTG  
 GAGCTGAGACCTCTGCCAGCCTGGCAGCAAGTAGGCAAGGACCTCACCTGCGCTGCCAC  
 GTGGATGGTGGAGCACCGCGGACCCAGCTCTCAGCAGTGCTGCTCCGTGGGGAGGAGATA  
 CTGAGCCGCCAGCCAGTGGGTGGGCACCCCAAGGACCCCAAGGAGATCACATTCACGGTG  
 CTGGCTAGCAGAGGGGACCACGGAGCCAATTTCTCATGCCGCACAGAAGTGGATCTCAGG  
 CCGCAAGGGCTGGCATTGTTCTTAATGTCTCCGAGGCCAGGAGCCTCCGGACTTTTCGAT  
 CTTCCAGCTACCATCCCAAAGCTCGACACCCCTGACCTCCTGGAGGTGGGCACCCAGCAG  
 AAGTTGTTTTGCTCCCTGGAAGGCCTGTTTCTGCTCTGAAGCTCGGATATACCTGGAG  
 CTGGGAGGCCAGATGCCGACCCAGGAGAGCACAAACAGCAGTGAAGTCTGTGTGTCAGCCACT  
 GCCTTGGTAGAGGTGACTGAGGAGTTCGACAGAACCCTGCCGCTGCGCTGCGTTTTGGAG  
 CTAGCGGACCAGATCCTGGAGACGCAGAGGACCTTAACAGTCTACAAGTCTTTTCAGCTCCG  
 GTCTGACCTGAGCCAGCTGGAGGTCTCGGAAGGGAGCCAAGTAACTGTGAAGTGTGAA  
 GCCACAGTGGGTGCAAGGTGGTTCTTCTGAGCGCGTTCGAGCCTAGGCCACCCACCCCG  
 CAGGTCCAATTCACACTGAATGCCAGCTCGGAGGATCACAAACGAAGCTTCTTTTGTCTCT  
 GCCGCTCTGGAGGTGGCGGAAAGTTCTGTTTTAAAAACCAGACCCTGGAAGTGCACGTG  
 CTGTATGGTCTCGGCTGGACGAGACGGACTGCTTGGGGAAGTGGACCTGGCAAGAGGGG  
 TCTCAGCAGACTCTGAAATGCCAGCCTGGGGGAACCCATCTCCTAAGATGACCTGCAGA  
 CGGAAGGCAGATGGTGCCTGCTGCCATCGGGGTGGTGAAGTCTGTCAAACAGGAGATG  
 AATGGTACATACGTGTGCCATGCCTTTAGCTCCCATGGGAATGTCACCAGGAATGTGTAC

CTGACAGTACTGTACCACTCTCAAATAACTGGACTATAATCATTCTGGTGCCAGTACTG  
 CTGGTCATTGTGGGCTCGTGATGGCAGCCTCTTATGTTTATAACCGCCAGAGAAAGATC  
 AGGATATACAAGTTACAGAAGGCTCAGGAGGAGGCCATAAACTCAAGGGACAAGCCCCA  
 CCTCCCTGAGCCTGCTGGATGAGACTCCTGCCTGGACCCCTGCAGGGCAACAGCTGCTG  
 CTGCTTTTGAACAGAATGGTAGACAGCATTTACCCTCAGCCACTTCTCTGGCTGTCACA  
 GAACAGGATGGTGGCCTGGGGGATGCACACTTGTAGCCTCAGAGCTAAGAGGACTCGGTG  
 GATGGAGCAAGACTGTGAACACGTGTGACCCGGACCCACCTACAGCCCGGTGGACCTTCA  
 GCCAAGAAACGCTGACTTCATTCTCTATTGCCCTGCTGAGGGGCTCCTGCCTAAGGAAG  
 ACATGATATCCAGTAGACACAAGCAAGAAGACCACACTTCCCCCGACACAGGAAAGCTG  
 AGACATTGTCCCCAACTCTTCTTGATGTATTTATTAATTTAGAGTTTTACCAGCTATTTA  
 TTGAGTACCCTGTATATAGTAGATCAGTGAGGAGGTGAATGTATAAGTTATGGCCTGGAC  
 CTTGCTGCAGATGCTGTGAGAGCTTGGGAAAAGATCACATGGGTTCGAGGGTTTTCTCTACT  
 GGTGAGGATGCTTTTCTCATAAGGGTTCGACTTTTTTTCACCAGTCACATAAACTATGTG  
 GACTGGCAGTGGTTCTCTGCTCCTCCACATCCTGGAGCGTCCCAGCACCTCCCCACCTAC  
 TTTTGTTCCTCAATGTCAGCCACCATGCCTTAGCAGCTGAACAATCGAGCCTCATGCTCAT  
 GAAATCATGGTCCCAGGCGGCTCCACCTCAAAGAGAAAGCCTGGAAGGAAATGTTCCAAC  
 TCCTTAGAAGGGTTCGTGCAAGCTGCTGTGGGAGGGTAAGCACCCCTCCAGCACAGAAAC  
 CTTTCTTTGAATCAATAAA

|         | Sequence            | Tm |
|---------|---------------------|----|
| Forward | CGAGATCGGGGAGGACAGC | 62 |
| Reverse | ACGACTGCACGGTGCCAC  | 60 |

#### VCAM

>NM\_011693 NM\_011693 Mus musculus vascular cell adhesion molecule 1 (Vcam1), mRNA. 2/2007

GCCCTTTTCGGAGCTGAAGGTCAGGAAAAGCCAGAGATTTATATACTTGGAAAGTGTGCTGT  
 TTCCAGGACTCAGAATGACTTCAGCCCAGAAAAGCAGCTGAAGGGGTTAACGTGGGGACT  
 TGGCTGGCTGTGAGTTAACTTTTTCCCTGGCTCTGGGTTTTCCCTTGAAGGGATTTCCC  
 TCCGCTCTCTAGCAAGACCCTTTATAAAGAGCAGACTTTCTATTTCACTCACACCAGCC  
 CGGCTGGCTTTGGAGGCTGAACACTTTTTCCAGACACTTTTTACGTGGGGCACAAGAAG  
 GCTTTGAAGCAGAGACTTGAAATGCCTGTGAAGATGGTTCGCGGTCTTGGGAGCCTCAACG  
 GTACTTTGGATACTGTTTGCAGTCTCTCAAGCTTTTAAAATCGAGATCTCCCCTGAATAC  
 AAAACGATCGCTCAAATCGGTGACTCCATGGCCCTCACTTGCAGCACTACGGGCTGCGAG  
 TCACCATTGTTCTCATGGAGAACCAGATAGACAGCCCACTAAACGCGAAGGTGAGGACG  
 GAGGGGTCCAAGTCCGTTCTGACCATGGAGCCTGTGAGTTTTGAGAATGAACACTCTTAC  
 CTGTGCACAGCAACATGTGGCTCTGGGAAGCTGGAACGAAGTATCCACGTGGACATCTAC  
 TCTTTCCCAAGGATCCAGAGATTCAATTGAGTGGCCCCCTGGAGGTTGGGAAGCCGGTC  
 ACAGTCAAGTGTGGCTCCAGACATTTACCCAGTTTACAGGCTGGAGATTGATCTGTTC  
 AAGGGTGACCAGCTCATGAACAGACAGGAGTTTTCTTTCAGAAGAGATGACAAAGTCTCTA  
 GAAACCAAGAGTTTGAAGTAACCTTTACTCCCGTCATTGAGGATATTGGAAAAGCTCTT  
 GTTTGGCAGCTAAATTACACATTTGACCAAATTTGATTTCTACTCAAAGAAAAGGGAGACT  
 GTCAAAGAATAACAAGTCTACATCTCTCCAGGAATACAACGATCTCTGTACATCCCTCC  
 ACAAGGCTTCAAGAGGGTGGTGTGCTGTGACAATGACCTGTTCCAGCGAGGGTCTACCAGCT  
 CCTGAGATTTTCTGGGGCAGGAAGTTAGATAATGAAGTTCTCCAGCTTCTCTCAGGAAAT  
 GCCATCCTCACCTTAATTGCTATGAGGATGGAAGACTCTGGAGTCTATGTGTGTGAAGGA  
 GTTAATCTGATTGGGAGAGACAAAGCAGAAGTGAATTAGTTGTTCAAGAGAAAACATTT  
 ATTGTTGACATCTCCCCGGATCTCAGGTGGCTGCACAAGTTGGGGATTTCGGTTGTTCTG  
 ACGTGTGCTGCTATTGGCTGTGACTCCCCTTCTTTTTCTTGGAGAACCAGACAGACAGT  
 CCCCTCAATGGGGTGGTAAGGAATGAGGGGGCCAAATCCACGCTTGTGTTGAGCTCTGTG  
 GGTTTTGGAGGATGAACACTCTTACCTGTGCGCTGTGACCTGTCTGCAAAGGACACTGGAA  
 AAGAGAACCAGGTGGAGGTTACTACTTCCCTGAAGATCCAGTAATTTAAAATGAGTGGG  
 CCACTTGTGCATGGGAGACCTGTCACTGTCAACTGCACAGTCCCTAATGTGTATCCCTTT  
 GACCATCTGGAGATTGAATTAAGTGAAGGGGGAGACTACACTGATGAAGAAAATATTTTTTG  
 GAGGAAATGGGCATAAAGTCCCTAGAGACCAAAAATTTTGGAAAACGACCTTCATCCCCACC  
 ATTGAAGATACCGGGAAATCTCTTGTGTTGCTCGCTAGGTTACACAGTGGTGAATGGAA  
 TCTGAACCCAAACAGAGGCAGAGTGTACAGCCTCTTTATGTCAACGTTGCCCCAAGGAA  
 ACCACCATCTGGGTGAGCCCTCTCTATACTAGAGGAGGGCAGTCTGTGAACCTGACC  
 TGCTCAAGTGATGGGATACCAGCTCCAAAATCCTGTGGAGCAGACAGCTAAATAATGGG

GAACTGCAGCCTCTTTTCTGAAAATACTACACTCACCTTCATGTCTACAAAAAGGGACGAT  
 TCCGGCATTATGTGTGTGAAGGGATTAACGAGGCTGGAATTAGCAGAAAATCAGTTGAA  
 CTGATTATCCAAGTCTCTCCAAAAGATATACAGCTTACAGTCTTTCCATCTAAGAGTGTC  
 AAAGAGGGAGACACCGTCATTATCTCCTGCACTTGTGGAAATGTGCCCGAAAACATGGATA  
 ATCCTGAAGAAGAAAGCAAAGACAGGAGACATGGTATTAAGTCTGTGGATGGCTCGTAC  
 ACCATCCGCCAGGCACAGCTGCAGGATGCCGGCATATACGAGTGTGAATCTAAGACTGAA  
 GTTGGCTCACAAATTAAGAAGTTTAACTTGTATGTAAAAGGAAAAGAACATAACAAGGAC  
 TATTTTTTCGCCCGAACCTTGCCTTACTGCGCATCTTCTTGGTAATACCTGCCATC  
 GGGATGATCGTTTTATTTTGAAGAAAAGCTAACATGAAAGGATCGTACAGTCTGGTGGAG  
 GCACAGAAATCCAAAGTGTAGCTAACATCTGAAATGTTTGAAGAAGACATTATTTATAA  
 AACCCAGATCCTTAATACTGTTTATTACAGCCCCGCCCTCCACAAACCAAGCCATGCA  
 TTCAGACTTCCCAGAACCCTTCTCAGTAAAGAAGGCAAAGTGGCTGCTTGTATCCCTTGCT  
 GAATGCAAGGAGCTAACCCAGAAAAGTTCTGCTTGACAAGTCCCCATCGTTGAAGTGACTG  
 GAATGGTCCCATGATGTGTATGTAAATAACATAAACTGTATATATGTAAAATAAAATTAT  
 GCCGTGCGGAGGTTGTTTAGAGTAGCAGCACTCCATATGCAGGTGAGAACGTAATCAGAG  
 AGTGTGCTTGGACTGACTGTTGTAACCTTAATGCTTCTTAGGAAAAGTTAATATTAATGT  
 TAATGTTGACTAGGCAGCTAACCCAGTGTACCTTTTTATGTTTTATTTTTCTTCAACCTAA  
 TTTTTATTCCATGAATTTTATTAACAATGATTTTCATGTTTTTTAAAAGAAGTCAGGGTTC  
 TATATTTTTATAGGCAAATGGTAAAGAGGTCCTGGGTTGACTTTCAGGTAATACTTTCT  
 AATTCATGGTAGAATGGCTAAGTAATTTCTCTACATGGTACTGTACGGTACGGGGACCT  
 GTTTCTTCATTGGGGTCTTGTGTAATGACTAACCTGATTTAAATGCGACTTCATTTGATT  
 TGTCTTTTATAAATACTATAGTAAAGTGGAAAGTTCTGAAACATGGGAGAGTTGTGTTTCA  
 TTTGTTGTAAATTGTCTCTCTTAATTGTTTTGTTCTTCTGGAATTGTCCATTATAAGAGT  
 AAAAATTCAAACCTACTAACCTAATACAGATACTCGAAACATAAAAAAAAAAAAAAAAAA

|         | Sequence              | Tm |
|---------|-----------------------|----|
| Forward | CGCCCGAACTCCTTGCA     | 60 |
| Reverse | TCCCGATGGCAGGTATTACCA | 61 |

LFA-1

>NM\_008400 NM\_008400 Mus musculus integrin alpha L (Itgal), mRNA. 3/2007

TGGAAAGGGGCCCCATGCAAGAGAAGCCACCATTTCCCTCTTCCCTCCCGGGTCTAGGTTGC  
 CAGCAAATCTCAAGAGCTCTCTGAGATCGAGTCCGGACCCACAGTCCCTCCTAAGCGCA  
 GATGAGTTTTCCGGATTGCGGGCCCCAGACTTTTGTACTGCGGACTCCAGCTGTTTGCCAA  
 GGCCTGGAGCTACAACCTGGACACACGGCCTACGCAGAGCTTCTTGGCACAAGCTGGAAG  
 ACATTTTTGGGTACCAGGTCTTGCAGATTGAAGATGGGGTTGTTCGTGGGAGCCCCAGGTGA  
 GGGGGACAACACGGGAGGCTCTATCACTGCCGAACAAGCAGCGAGTTCTGCCAGCCAGT  
 CAGCCTACATGGTTCTAACCATACCTCCAAGTACTTGGGAATGACGCTGGCAACAGATGC  
 CGCCAAGGGAAGCCTTTTTGGCCTGTGACCCTGGACTGTCTCGGACATGCGATCAGAACAC  
 TTACCTCAGTGGCCTCTGCTACCTCTTCCCCAGAGTCTGGAGGGACCTATGTTACAAAA  
 TCGTCCCGCCTATCAGGAATGTATGAAGGGCAAAGTCGACCTGGTGTCTTCTGTTTCGATGG  
 CTCACAGAGCTTGGATAGAAAGGACTTTGAAAAAATCCTGGAATTCATGAAGGATGTGAT  
 GAGGAAGCTCAGCAATACTTCTACCAGTTTGTCTGCCGTCCAGTTCTCCACAGACTGCAG  
 AACAGAATTTACTTTCTTGGACTACGTTAAGCAGAACAAGAACCCCGATGTTCTGCTAGG  
 CAGCGTGCAGCCCATGTTCTTGGCTGACCAATACCTTTTCGTGCCATCAACTATGTGGTGGC  
 ACACGTGTTCAAAGAAGAGTCTGGTGCCAGGCCGGATGCTACCAAGGTGCTTGTTCATCAT  
 TACAGACGGGGAGGCAAGTGATAAAGGCAACATCAGTGCAGGCCACGACATAACCCGCTA  
 CATCATCGGGATTGGCAAGCATTGTTGTGAGCGTACAAAAGCAAAGACGCTCCACATATT  
 TGCTCAGAACCTGTAGAGGAATTTGTGAAGATTCTGGACACCTTTGAGAAGCTGAAGGA  
 TCTTTTTACTGACCTGCAGAGGAGGATTTATGCTATTGAGGGCACAACAGACAGGACCT  
 GACATCCTTTAACATGGAACCTCTCCTCCAGCGGGATCAGCGCAGACCTCAGCAAGGGCCA  
 TGCAGTTGTGGGAGCTGTTGGGGCTAAGGATTGGGCCGGGGCTTTCTGGACCTGCGTGA  
 AGACTGCAGGGTGCCACATTTGTTGGGCAGGAACCGCTGACCTCAGATGTGAGAGGGGG  
 CTACCTGGGTTACACTGTGGCCTGGATGACCTCCCCGGAGCTCCAGACCCCTGCTGGCAGC  
 AGGAGCCCCACGGTACCAGCATGTGGGACAAGTACTGCTTTTTCCAAGCCCCAGAGGCTGG  
 AGGACGTTGGAACCAAACCCAGAAGATAGAAGGGACTCAGATCGGATCTTACTTTGGTGG  
 GGAACATATGTAGTGTGACCTGGACCAAGATGGCGAGGCAGAGCTGCTGCTGATTGGAGC  
 ACCCCTGTTCTTTGGGGAGCAGAGAGGAGGCCGAGTGTTCACCTTACCAGAGAAGACAGTC  
 GCTGTTTGAATGGTCTCAGAGCTACAGGGTGACCCTGGCTACCCGCTTGGTTCGGTTTTGG

AGCCGCCATAACTGCCCTGACGGACATCAATGGGGATAGGCTGACTGATGTGGCTGTGGG  
AGCCCCTTTGGAGGAGCAGGGGGCTGTGTACATCTTCAATGGGAAGCCTGGTGGGCTCAG  
TCCCCAGCCAAGCCAGCGTATACAAGGAGCCCAGGTGTTCCCAGGAATCCGGTGGTTTTGG  
CCGCTCCATCCATGGGGTGAAGGACCTTGGAGGGGACAGGCTGGCAGATGTGGTTGTAGG  
AGCTGAGGGTTCGGGTGGTTGTGCTGAGCTCCAGGCCGGTGGTGGATGTGGTCACTGAGCT  
GTCGTTCTCCCCAGAGGAAAATCCCAGTGCACGAGGTGGAGTGCTCCTACTCAGCCAGGGA  
GGAGCAGAAAACCGGAGTCAAGCTCAAGGCATGCTTCCGGATCAAGCCCCCTCACGCCACA  
GTTTTCAAGGTCGCTTGGCAACCTCAGCTACACCCTGCAGCTGGATGGCCATCGGAT  
GAGGAGCCGAGGGTGTTCAGATGGAAGCCACGAGCTCAGTGGAAAACACCTCCATCAC  
CCCAGATAAATCCTGCTTGGACTTCCACTTCCACTTCCCGATCTGCATTCAAGACCTCAT  
CTCCCTATCAATGTCTCCCTGAATTTCTCTCTTTTGGAGGAAGAAGGAACACCAAGGGA  
CCAAAAGGCAGGGCCATGCAGCCTATCCTGAGACCTTCAATCCACACAGTACTAAGGA  
GATCCCTTTTGGAGAAGAACTGTGGTGAAGATAAGAAGTGTGAGGCAAACCTGACCCTGTC  
ATCCCCTGCCAGATCTGGACCCCTGCGTCTGATGTCTCTGCCAGCCTTGCTGTGGAGTG  
GACACTGAGCAACTCAGGGGAAGATGCCTACTGGGTGCGATTAGACCTGGACTTCCCTCG  
GGGACTCTCCTTCCGGAAAAGTGGAGATGCTTACGCCACACAGCCGAATGCCTGTGAGCTG  
CGAGGAGCTCACCGAGGGTCAAGTCTCCTGACTAAGACACTGAAATGCAATGTAAGCTC  
TCCCATCTTCAAAGCAGGCCAGGAGGTGAGCCTCCAGGTGATGTTTAAACACGCTACTCAA  
CAGCTCCTGGGAAGACTTCGTTGAGCTGAATGGCACTGTGCACTGTGAGAATGAGAATC  
AAGCCTCCAGGAGGACAACCTCAGCCGCCACCCACATTCTGTCTGTACCCTGTCAACAT  
CCTTACTAAGGAGCAGGAGAACTCCACTCTCTATATCAGTTTTCACCCCTAAAGGTCCCAA  
GACCCAACAAGTCCAGCATGTCTACCAGGTGAGGATTCAGCCATCTGCCTATGACCACAA  
CATGCCACACTAGAGGCCTTGGTTGGGGTGCCTTGGCCTCACAGTGAGGACCCCATCAC  
ATACACATGGAGTGTACAGACGGATCCCCCTTGTCACTTGCCACAGCGAGGACCTGAAGAG  
GCCGTCCAGCGAAGCTGAGCCTTGTCTGCCTGGAGTCCAGTTCGGCTGTCCAATTGTCTT  
CAGGCGGGAGATCCTCATCCAAGTACGGGGACCGTGGAACTCTCCAAGGAAATCAAGGC  
CTCCTCCACACTCAGCCTCTGCAGCTCACTCTCCGTCTCCTTCAACAGCAGCAAGCATTT  
CCATTTGTATGGCAGCAAAGCCTCCGAGGCCAGGTCTCTCGTGAAGGTTGACCTGATCCA  
CGAGAAGGAGATGCTTACCGTGTACGTACTCAGCGGCATTGGGGCCCTCGTGCTTCTGTT  
CCTGATTTTCTGCGCTCTACAAGTTGGCTTCTTCAAACGGAACCTGAAGGAGAAGAT  
GGAGGCTGATGGAGGTGTTCAAATGGAAGCCCTCCAGAAGACACTGACCCTCTGGCAGT  
ACCTGGGGAAAGAGACCAAAGATATGGGCTGTCTAGAGCCCCCTCCGGGAGAGTGACAAGGA  
CTAAGGCCTAGGTCTGATACACTGACAGCCAGGAATAGACTTGAGAGCCCTGGCTCTGA  
CCAGCTTCAAGTACATGCCACCGTGTATCCTGTCTTCACTAGTCATTGCTGTTCTTAGT  
CCTCAGTTTTTCCATCTCGAGCATAGAACTCATTCTATGTTATCTACAGGTGCCTGGCA  
AGTAGGCTGATGAAGGCCAAGAGGGCCATCGGTGAAGCCTGTCTTCTGCTAGCCTGCCTT  
GTCCCTCTGAGAGAATCTTTGAAATAAACTCGGAGAAACTGCCATCTCAGGA

|         | Sequence                | Tm |
|---------|-------------------------|----|
| Forward | GGACACACGGCCTACGCAGA    | 63 |
| Reverse | GCAAGACCTGGTACCCAAAATGT | 60 |

VLA-4

>NM\_010576 NM\_010576 Mus musculus integrin alpha 4 (Itga4), mRNA. 2/2007

GGAAACGGGGCGTGGGCCAGAGCCTGAAGCATCCCTGGCCACTACGATCGCTCCGCCTGT  
GGCCACCAATTTCCCTCCTTCTTGGCGTCCCTCTCTCCGCCCCCTGTGCGCTGCCAGCAC  
CGGACACGCTGCTGCACTTCACTCTTGGGGCGCTTCTCTTTGGCCAACCGTTCGCATC  
CTGTGCAACTCTGGTCAAGTGGCCGTTTTGTGTTGAATGTTCTCCACCAAGAGCGCATGGC  
TGCGGAAGCGAGGTGCAGACCGAGGTCCCGAGGGATCGCCCTCCGGGAAGCGGTGATGCT  
GTTGTTGTACTTCGGGGTGCCAACCAGGCACTCTACAACCTGGACCCGGAGAATGCACT  
GCTGTACCAGGGCCCCCTCCGGCAGCCTGTTTGGCTACTCGGTGGTGTGTCACAGCCACGG  
GTCGAAGCGCTGGCTCATCGTGGGGCTCCCACTGCCAGCTGGCTCTCTAATGCCTCAGT  
GGTCAATCCTGGGGCGATTTACAGATGCGGGATCAGAAAAGAAATCCAAAACAGACCTGCGA  
ACAGCTCCAGCTGGGTAGCCCCAGTGGAGAGCCTTGTGGGAAGACATGCCTGGAGGAGAG  
GGATAACCAGTGGCTGGGGGTCAACCTTTCCAGACAGCCTGGAGAAAATGGCTCTATCGT  
GACTTGTGGGCACAGGTGGAAAAATATTTTTTACATGAAGAGCGATAACAAAATCCCCAC  
TGGCATTGTGCTACGTATGCCTTCTGATTTGCGGACAGAACTGAGTAAAAGGATGGCCCC  
GTGTTACAAAGATTATACGAGAAAATTTGGAGAAAATTTTGCATCATGTCAAGCTGGAAT  
ATCTAGTTTTTACACACAGGATTTAATTGTGATGGGGGCCCGGGATCATCGTACTGGAC

TGGCACCGTCTTTTGTCTACAATATAACTACAAACCAATACAAAGCATTGTTGTAGACAGACA  
GAACCAAGTAAAATTTGGAAGCTACTTAGGCTACTCAGTTGGAGCTGGACATTTTCGAAG  
TCCACATACTACCGAAGTCGTGGGAGGAGCCCCCTCAACACGAACAGATAGGAAAAGCATA  
TATATTTAGCATTGATGAAAACGAACTGAAACATCGTATATGAAATGAAAGGTAAAAAGCT  
TGGCTCATACTTTGGAGCTTCTGTCTGCGCTGTGGACCTCAATGCAGATGGCTTCTCAGA  
TCTCCTTGTGGAGCTCCCATGCAGAGCACCATCAGGGAGGAAGGAAGAGTATTCGTGTA  
CATCAACTCTGGCATGGGAGCTGTGATGGTTGAAATGGAAAGGGTCTTGTGCGAAGTGA  
CAAATATGCTGCAAGATTTGGGGAGTCTATAGCGAATCTTGGCGACATTGACAATGACGG  
CTTTGAAGATATTGCTATTGGTGCACCACAAGAAGACGACTTGAGAGGTGCTGTCTACAT  
TTACAATGGCCGAGTCGATGGAATCTCCTCCACCTACTCACAGAGAATTGAAGGACAGCA  
AATCAGCAAATCATTAAGGATGTTTGGACAATCTATCTCAGGACAAATTGATGCAGACAA  
CAATGAGATATGTTGATGTAGCCGTTGGTGCATTTCAATCTGATTCTGCAGTGTGCTAAG  
GACAAGGCCTGTAGTGATTGTTGAAGCATCTTTAAGCCATCCTGAGTCTGTAAATAGGAC  
AAAGTTTGACTGTACTGAAAATGGACTTCCATCTGTGTGCATGCATCTTACACTGTGTTT  
CTCATATAAAGGCAAAAGAGGTCCCAGGCTACATCGTTTTGTTTTACAATGTGAGCTTGGGA  
TGTGCACAGGAAGGCAGAGTCTCCGTCAAGATTTTATTTCTTCTCTAATGGGACTTCTGA  
CGTGATTACAGGAAGCATAACGAGTTTTCAAGCAGTGGAGAGAAATGTAGGACACACCAGGC  
ATTCATGCGGAAAGACGTGCGAGACATCCTTACCCCATTCATGTAGAGGCCACATACCA  
CCTTGGGCATCATGTGATCACCAAACGAAACACTGAGGAATTTCCACCCTCCAGCCGAT  
CCTTCAGCAGAAGAAAAGAAAAGACGTTATTAGAAAATGATAAACTTTGCAAGGTTTTG  
TGCCATGAAAATTGCTCTGCTGATCTCCAAGTTTTCTGCAAAAAGTTGGATTTTTGAAGCC  
ATATGAAAATAAAACCTATCTTGTCTTGGGAGCATGAAGACCATAATGCTAAACGTGTC  
CTTGTTC AACCGTGGCGATGATGCTTACGAAACCACTCTGAATGTCCAACCTCCCCACAGG  
CCTTTATTTCAATTAAGATCTTAGACCTGGAAGAGAAAACAAATAAACTGCGAAGTGACTGA  
GAGCTCAGGCATAGTGAAGCTTGCCTGCAGCCTAGGTTACATATATGTGGATCGCCTCTC  
AAGGATAGACATTAGCTTTCTCCTGGATGTGAGCTCACTCAGCAGGGCACATGAGGACCT  
CAGCATCAGTGTGCATGCCTCCTGTGAAAACGAGGGCGAATTGGACCAAGTGAGGGACAA  
CAGAGTGACCTTAACGATAACCTCTAAGGTATGAGGTTATGCTGACTGTTTATGGGCTTGT  
GAACCAACTTCAATTTGTGTATGGATCTAGCGAAGAAAACGAGCCAGAAAACATGCATGGC  
CGAAGACTTCAACTTCTTCCATGTTATAAAACACTGGGATTAGCATGGCTCCAAATGT  
TAGTGTGAAAATAATGTTACCAAATTTCTTTTCTCCCTCAAGATGATAAGTTGTTCAACGT  
TTTTGGATGTCCAGACAACCTACAGGGCAATGCCATTTTAAACACTATGGAAGAGAGTGTAC  
ATTTGCACAGCAAAAAGGCATAGCGGGGACGTTGACCGATATAGTCAAATTCCTATCAAA  
GACTGATAAGAGACTCCTGTATTGCATGAAAGCTGATCAACACTGTTTAGATTTCTTATG  
CAATTTTCGAAAAATGGAAGTGGGAAGGAAGCCAGCGTTTATATTAGCTGGAGGGCAG  
GCCATCCATCTTGGAAATGGATGAGACCTCATCACTCAAGTTTGAATAAAAAGCAACAGC  
TTTTCCAGAGCCACACCCAAAAGTTATTGAACTAAATAAAGATGAGAACGTGGCCCATGT  
TTTTCTTGGAAAGGGCTCCATCATCAAAGACCCAAAACGACATTTACCATCATTATTATTAC  
CATCAGCTTGTACTTTGGACTTATTGTACTTTTTATTAATTTTATGTGTTATGTGGAAGGC  
TGGATTTCTTTAAAAGACAGTACAAATCTATCCTACAAGAAGAAAACAGGAGAGACAGCTG  
GAGTTATGTCAACAGCAAAAAGCAATGATGACTGAAGACTTCTTACACTGAGAGAACTGAAA  
AACTCAGGTTAGGAAAAAGAAAATCCTGTTT CAGAAGACCCGTCAGAATTTCTTCTTTTTTT  
CCATGTGCTTATGATTTTTGTGACATACTTTAGTGCAGGGGAAAATCTTCAAGAAAAGAGC  
TACCCAAAGGTGGCTTGTGAGCTTCCGGTGGATGAGTGAAGCAAAAACACTAAAGCTCTGGA  
TGTACCGGAGAGGTGACCTGTTTAAAGACAACCTTAAAGCTAGAGAGAATCCAGACTCAGCA  
GGGCCGACTTAAAGGGAATGATTTTTCAACATCACTGATGAAGTGGCTCATCTCAGTGAA  
ATGGATGCCATGATGTGGAACCTTGTGGCTTCAAATACTTTTGTATTTATCTTCAAACATA  
TGATCATGATCTTTGAAATTCAGTGAAGCTTTTCAAATGGCTGTTCCAAGATTGTCTAAT  
GGATAAGTCATTTTTATTAGATATTTTTCTTTATTTACATTTCAAATGTTATCCCCCTTTC  
CTAGTTTTCCACTCCAAAATCCCCATCCTCTCCCCCTGTCCCCCTGCTCCCCAATCGACCC  
ACTCCCCGTTCTTGGCCAAGGCGTTCCCCCTATACTGGGGAATAGAACCTTACAGGACCA  
AGGGCCTCTCCTCCTATTGACAGAGCACAGGGTCCCCAATGAAGGAGTTAGAGAAAATAC  
CCAAGGAGCTGAAGGGTTTTGCAGCCCCATAGGAGGAACAACAATATGAACTAACAGTA  
ACCCAGAGCTTCTTGGGACTAAACCACCAACCAAGAAAACACACGGAGAGACGCATGG  
CTCTAGCTGGATCAATCATTTTTAAAGCAGAGGACCTGAAGACTGCTCTTGGTGGTGTGCTGC  
ATCCCTGGGCTGTGTCCCTACAGCCCTTTTACTCTGCAGATAGGAACTGTAAAATCCTAA  
AGAACAAAATCCGTTTTGCAGCAGGATGGCTTCTGGGGAAAATGGTCAGCTGCGGACTCTTG  
TGTGTATGTACATATACTTTTTTAAAGGATAAAAATCTCAATCTACTTCTTTATTAAGAA  
CACCCAGGAATAGTTTTGCATCTTCTAAGCTTACCTTTAATACCAATTTCTTAAGAATTTTT



ATCCTCATAGCAGATTATAAATATCGCACTTTAGCTGATACACACTGATACAACATGAAC  
TGCAGCTCACTGATGATCGAAAATTGTGTGAAGAGAGATTTAGGAACCAATATTTTCATAA  
AACATTCCTACTGCATCAAATTATGCAAACATGAGTATCTGCTAGGATATTGTTGTTTCTCT  
TGGTCTGGTTGAATATACATAAACTAGGACTCTAAAACACCACATTCTGTGCATAGAAATG  
GAGACACAAAAATCATAGTTGGAACCTGCAAATCACTGATCAAGTTTGTGTGCAGTGGCAT  
CAAAATTTCCCATGCGATAATGCATGCTTGATGTTGTTGAACAAGATACTATTTTAAAAATG  
AAATAGCTTCTACCTGGGTTTACATAAATTTGTCTGTAATTACAATCATTTTTGTAGTAT  
TTATTTTCATATATGTAGTTTGATAAATGTAAGTTTTTCATTTGAATCTGTTATGTGTAAGC  
AAGCTAAGGCCAGACTTTGAACATGTGCTGGGTAAAAGGGGCAGCCTTCAGTGTTGTGAA  
GAAAGATCGCTTTACAGGAAGGGTTTGTATGCCAGCTGGCCCTTCCTCAGATTTTCTGACT  
TGTGAGGATGGCTTGTTCACAAGCCTCTGGCTGGAGCCGTGGAGGGAGGTTTTGAGTGCT  
GAAACTTGACATAGACATCAGATCTGGGTGAGCAGAAACCATATTTAATTAGATGCTT  
ATATTTTAAAGGGATGCTTTTTTGTGTAAAAGGTTAAGTTGATGGTTTTCTTATAAAAA  
TTCAAGTAGTTATTTTCATGAGGATGCCAAAAGTTAATAGATGAGAAATCAATATCATTTTA  
GACCTACCGTTTCAAGGAATGGTCTCTGAGGAGAGTTAAATGTGGATCATTGCACTGAAA  
ACCGACTCCTGCCTTTAGGTACAAAAGAACGTAGCTACCTCCTGGGCCACATTTTGCC  
AATTAGAAAAGAAATATTTTTATATTTATTAATAAAAACCTAGAATTTTATATAAGCTTTAA  
AATGTAGTTATTTCAAAGATGCTGTTATGGGATGGGTAGTAGAATAGTAGCCTAAGAGG  
AAAGAATGTTTTTAAAGTGGGTGTTTCGTGGTTATGTTACTATCTCACTGTGAAGTCTGAG  
ATTTTACAGAAGTTTTGTTTTACTAGGTTACAGGAGATACTAAAGAATTATCTTCAACAG  
TATTGAGAGAGCACAAATGTTGTTAAAATTAGATCTAACAAAACACCTTCCAAAAATCAAAA  
CTTTGATTTTTTTCATTAATTTTCATATTTTTGATTTTCAAATACCTGGCTACTATTTTA  
ATTATATTAATAATATTTTAAATTGCATTAAGTAGATACTTTAATTATATTAATAATAGATAG  
CTTCATTAATAATGTGTTGCAGTAAATCTCTCCAACCCAAATATGCCTTGGCAATGAAAAC  
ACAACACAGTTAATATGATTGCATGCTGTGCGCCTAGATTGGGCAGATCTACTGCTACAC  
TACTGTCTTCCACAGCTTATGAGACCCCTTAGAACTTGCGGTTTTCTCCAGGCCATGTGCT  
TCTGCTCTGCTTCACTTCATCTTCTCCCTCTGCATCCTCTCCCTCTTCCATTTTCTC  
CTTCTTTTCTCTCCCTACCTTCGGCTCCGCCTTCCCTTTTATCTGCCCAAATATCAGCTC  
TCCTTTTATTTTACAATTAAGGTGGGAATCAGGTTTACAGGAAATCACCTGAGTGCTGAC  
TCATTCCTTTGTTTACAACCGCTCATGGGAGAACAGAATTAACATCAAATATAAATTAGCCC  
CAGGGCTATCCTCAACATTTACCCCTTCTGTCCAATTAAAAAGACTATTTTATCTCAGAT  
ATAAATTGAACATAACAATTATTATTTTGTAAATTTATAAAGTACAGGAGACCTAACACCCA  
GTCCATCATCTTTGTTAAATTAATAAAAAATCTCTGTGCATCTATCCTTACTTAAAAAGACTA  
TAGTTCTGCACCTGGCTAGTTCTGCATCTGAAAACCATCCTCTCAAATCTATTCTCTCA  
AAGTGAAGCCTGGGCTCGCCTGAGACTATGTAGTTTTTCAACCTCAACATAAATCCAA  
GAATGACTGATATTAACTGAAAATATATAGGAAGCCTAACATAGCTTCCAAAATTTAGAT  
AATTTGTTGAGACCACTGGTCACTTGGACAGTCCCTTACTTCAACAGGGTGGAGCTTTGA  
TCTTCAGGCTACTGGCCTTAGTCACTGACAAGACTTAGAGAAACAAGAATATTAAGGAC  
TAGCCTACTGTCTCGGCAGAATCAAGCTGTCCAACTGTAGTTGTGTCTTTCTTTGGA  
CAGTATTATATCTGTAGATGAAATGAGCCAATTTCTGCCTAGTGACTTTCACCACAACCTA  
GAGTAACTCAAAGATGCTCAGTTTTCTTTTGAATCCAAGACAGGGAAAGCTGTGAGGAG  
CAGACTAGTCTCAACAACAAGTGAATAAATAACATCAAACCTTACATTTCTGTGGACTTCT  
GATGTTTTTGGAAAACCAATTATCTATATGAAGTAATCTGAACTGTTCTCTGAACTCTC  
TCAGCCATTTCTGATTAATAAATACTGAAAACACCCTAACAAATAAACTCAGAGCCAAGAAT  
TTCTATCTGACCCTTAACTCACAGGCTTAAACATCTCAGCTCTGTTTATCATAACAGCA  
ATTAAGGACTGGGTCTAAGCCTTGTACTTCAAATTTTTAGTATCAAAGACAACCTATA  
ATAACCACCCGACCCGAAAGCTTAGGGAACCTGGGATGATGAATCTTATAACTTCTTC  
AAGTGATATGGGCGTTGAGATATTTTTGAAGGAAGGGGAAGAATAGGGAAGGGGGAG  
TTAGTTGGCCTTAGGAAGGCCCCACCATGATTGTATTAGTTTCTGATGTCTCTGTCTGA  
CTGGATCCGGATGAAAAACCAAGATATCAGTTTCAAGCAAGTCAAGTTCAGCATGTCTGATG  
ATGAAATTCACCAAGGCTGTATATTTCTGTAATATATAAATCTCAAAAAAAAAAATTTAGTA  
TCATCAATATAACCTTTTTGTTTATTCTCAGGAATCTAGTTCTCAGGGGGTCTCCTTCT  
ATCAAATCTGATCCATATAACTCTAGAATGTGTAATAACCTTAATCACCTTTTCCAAAA  
CACAAAGATAAAAACCTTTCCCAAATCAGCATATCCTTTCAGCTGGTAACCAGGAAAACCT  
GTAACCTGCGCTCTGTCCAGAGGAACAATAAAAACAACCACAACACAAAAATCACACAC  
ATTTTAGCCTATTTAGGCCTTTCTAATTTGTCTGATGTCAGGATATTAACCCAAAATTTCCA  
TGGAGTCCACGTTAGACAGAATATGAATCTCTTGCAGACTTTATTATACCATCTTACAAC  
AATTGATTCATACTTCTATTTTCTTTTCTTTTCTTTTCTTTTCTTTTCTTTTCTTTTCT  
CCTCTTTTCTTTTCTTTTCTATACCTGGTTTTAAGAAGCAGTTTTGTCAAACCAGGATTTAA

ACCCAAAATTCCCGTGCAGCCCACATTAGACAGAATATGAGTATCCTGTAAGACTTATTA  
 AAGCAATATATCTTTATACCATCTTTAAAGCAATTAATTCAAACCTTCTACTAATAACCTGT  
 TATACCGTCTATCTGTTGTGCTCTCTACCAGGAGCCACAGACATTTATTTAATTAATACC  
 TATTATAACATGTATCTGTTATGCTCTCTACCTGGAGACATAGACTTTATTAATTAATAC  
 TTGTTTCATAGCAGGCAATTATCACTGCTGTCTCTACTTTGGAGTCAGTAACTAATAATCCC  
 TATATAGTTCCAAATCACAGGTAATAATTTCCCATCTTTAAGTACTATAACCTGCTTATAAG  
 AGGCAGCTTGACAAACCAGGATTTAAACTAAAACTCCAGTGGAGCCCATGTTAGACAGA  
 ATATGAGTATCCTGTAAGACTTACTAGAGCAATATATCGTTATACTATCTTTAAGTATCA  
 AAAGGTTATATTTTTCTCTTTATATCAATGAGTTATTTGGTCTGGAGACCTTTGTACCTT  
 TGCCCTCCCAATTTTTTATTTCATGGGGAGAAGCTGAATGTAAAAAGACCCCTGTTGTCTGT  
 GTCCTGTGTTGGAAGTGGGGGAGGCAGGGTAGGGAACAAAGGACATAGGGAAGCAACAG  
 GGAAGGCTCTCTCGGTGTAGATGCTTCTCTGCTGTTCTCTGTAGGCCCTCAAATCAAAA  
 TTCATACTGCTACAGCCTAGGTCACTGCCCAAGCCCTTTTCAGGTGTTGGGGGGCAGTGA  
 ATTTTTATCTTTAGTTAGTTGAGTTCAAATCAATATGTTGGGCGCCATTTTGTGTGTTAA  
 ATCTCCATCCCAATAAGCCCCGGCAATGAAAAGCATGATTTAATTCATATGCTTACAAGC  
 TGTGCACCTAGATTGGGCAGATCTACCACTACACTACCATCTTCCACAGTTTATGAGACC  
 CCTTAGAACCTGTGGTTTTCTCCAGGCCATGTGCTTCTGCTCTGCTTCACTTCATCTTCT  
 CCTCCTCTGCATCCTCTCCCTCTTCCATTTTCTCCTTCTTTTTCTCTGCCCCACCTTCCCT  
 TTTATCTGCCAATCATCAGCTCTCCTTTGTTTTACAAATTAAGGTGGAATCAAGTTTAC  
 AGACAATCACCTGAATGCTGACTCATTCTTGTTCACAACCACTCACAGGAGAACAGAAT  
 TAACATCAAATATAATTAGCCCCAGGGCTATCCACAACAAAAATGCATTTTCTATTTGTA  
 TATATCTTGCATGCCAGATTCTTTCATAATAAAATTTCTGCTTACATACTTCTTTCATATG  
 CAATCACATGCTACTTTGCAATCATTCAATTTCTTCCAGGCTTCTTCCATAGAGCCTGATC  
 AGTCTTGGGTGCAGCCTATAAGGAATAACAAGGGTTTGATGATTTCAATTTCTGGGCCACT  
 ATGATTTTTTACATACCTCACAAGTGTGGTGCATAAAATCACACATACAGATTGGCATATA  
 CTCCTAGCTGAGCCACAAGCCAGCAAGGACCTAAAAACCAACATCTGTGACCATTCCAA  
 AGCACTCTTAACCACCTTTCTGCCTGGTTAATATCCGCTAGTGCCTCTGTGAAGAGACA  
 GTTACTTAAGAACACCCCACCTAGCAGAGGACCCTGTCCCTCCCTCCCAGCACACTTCAG  
 CCTGCTGAGACATTAAGCTTGCTAAGATTGAGTATGAGTATTGAGTTTCTACAACCTTAT  
 ACCCAATTGCTCATTCTTGTGATATATGTACAGTGTGTGGAATGCATTATAAAGATCT  
 AACAGTCAACTCCATTACTTTGTGTGCTGAATTAATAAAAAAGGATTTTGAT

|         | Sequence             | Tm |
|---------|----------------------|----|
| Forward | TCCGGGAAGCGGTGATG    | 60 |
| Reverse | AGTGCATTCTCCGGGTCCAG | 61 |

**VEGF-A**

>NM\_001025250 NM\_001025250 Mus musculus vascular endothelial growth factor A (Vegfa), transcript variant 1, mRNA. 2/2007

CGGGATTGCACGGAACTTTTCGTCCAACCTTCTGGGCTCTTCTCGCTCCGTTAGTAGCCGT  
 GGTCTGCGCCGAGGAGACAAACCGATCGGAGCTGGGAGAAGTGCTAGCTCGGGCCTGGA  
 GAAGCCGGGGCCCGAGAAGAGAGGGGAGGAAGAGAAGGAAGAGGAGAGGGGGCCGAGTG  
 GCGCTCGGCTCTCAGGAGCCGAGCTCATGGACGGGTGAGGCGGCCGTGTGCGCAGACAG  
 TGCTCCAGCCGCGCGCGCCCCAGGCCCGGCCCGGGCCTCGGTTCCAGAAGGGGAGAGG  
 AGCCCGCAAGGCGCGCAAGAGAGCGGGCTGCCTCGCAGTCCGAGCCGGAGAGGGAGCGC  
 GAGCCGCGCCGGCCCCGGACGGGCTCCGAAACCATGAACTTTCTGCTCTCTTGGGTGCA  
 CTGGACCCTGGCTTTACTGCTGTACCTCCACCATGCCAAGTGGTCCCAGGCTGCACCCAC  
 GACAGAAGGAGAGCAGAAGTCCCATGAAGTGATCAAGTTTCATGGATGTCTACCAGCGAAG  
 CTACTGCCGTCCGATTGAGACCCTGGTGGACATCTTCCAGGAGTACCCGACGAGATAGA  
 GTACATCTTCAAGCCGTCTGTGTGCCGCTGATGCGCTGTGCAGGCTGCTGTAACGATGA  
 AGCCCTGGAGTGCCTGCCACGTCAGAGAGCAACATCACCATGCAGATCATGCGGATCAA  
 ACCTACCAAAGCCAGCACATAGGAGAGATGAGCTTCTTACAGCACAGCAGATGTGAATG  
 CAGACCAAAGAAAAGACAGAACAAGCCAGAAAAAAAATCAGTTTCAGGAAAAGGGAAAAGG  
 TCAAAAACGAAAAGCGCAAGAAAATCCCGGTTTAAATCCTGGAGCGTTCACTGTGAGCCTTG  
 TTCAGAGCGGAGAAAAGCATTTGTTTGTCCAAGATCCGACAGCGTGTAAATGTTTCTGCAA  
 AAACACAGACTCGCGTTGCAAGGCGAGGCGAGCTTGAGTTAAACGAACGTACTTGCAGATG  
 TGACAAGCCAAGGCGGTGAGCCAGGCTGCAGGAAGGAGCCTCCCTCAGGGTTTCGGGAAC  
 CAGACCTCTCACCAGAAAGACCGATTAACCATGTACCACCACGCCATCATCGTACCCTG  
 TGACAGAACAGTCTTAATCCAGAAAGCCTGCATGAAGGAAGAGGAGACTTTCGAGGA

GCACTTTGGGTCCGGAGGGCGAGACTCCGGCAGACGCATTCCCGGGCAGGTGACCAAGCA  
 CGGTCCCTCGTGGGACTGGATTTCGCCATTTTCTTATATCTGCTGCTAAATCGCCAAGCCC  
 GGAAGATTAGGGTTGTTTCTGGGATTCTGTAGACACACCCACCCACATACACACATATA  
 TATATATTATATATAATAATAATATATATGTTTTATATATAAAAATATATATATATTCTT  
 TTTTTTAAATTAACCTCTGCTAATGTTATTGGTGTCTTCACTGGATATGTTTGACTGCTGT  
 GGACTTGTGTTGGGAGGAGGATGTCCTCACTCGGATGCCGACACGGGAGACAATGGGATG  
 AAAGGCTTCAGTGTGGTCTGAGAGAGGCCGAAGTCTTTTTGCCTGCCGGGGAGCAAGCAA  
 GGCCAGGGCACGGGGGCACATTGGCTCACTTCCAGAAACACGACAAAACCCATTCTGGCC  
 CTGAGTCAAGAGGACAGAGAGACAGATGATGACAGAGAAAGAGATAAAGATGCCGGTTCC  
 AACCAGAAGTTTTGGGGAGCCTCAGGACATGGCATGCTTTGTGGATCCCCATGATAGTCTA  
 CAAAAGCACCCCGCCCTCTGGGCACTGCCTGGAAGAATCGGGAGCCTGGCCAGCCTTCA  
 GCTCGCTCCTCCACTTCTGAGGGCCCTAGGAGGCCCTCCACAGGTGTCCCGGCAAGAGAA  
 GACACGGTGGTGGAAGAAGAGGCCCTGGTAATGGCCCTCCTCCTGGGACCCCTTCGTCTT  
 CTCCTTACCCACCTCCTGGGTACAGCCAGGAGGACCTTGTGTGATCAGACCATTGAAA  
 CCACTAATTCTGTCCCCAGGAGACTTGGCTGTGTGTGTGAGTGGCTTACCCTTCCCTCATC  
 TTCCCTTCCCAAGGCACAGAGCAATGGGGCAGGACCCGCAAGCCCTCACGGAGGCAGAG  
 AAAAGAGAAAGTGTATATACGGTACTTATTTAATAGCCCTTTTTAATTAGAAATTA  
 AACAGTTAATTTAATTAAGAGTAGGGTTTTTTTTCAGTATTCTTGGTTAATATTTAATTT  
 CAACTATTTATGAGATGTATCTCTCGCTCTCTCTTATTTGTACTTGTGTGTGTGTGTG  
 TGTGTGTGTGTGTGTGTGTGTGTGTGTGTATGAAATCTGTGTTTCCAATCTCTCTCCC  
 AGATCGGTGACAGTCACTAGCTTGTCTGAGAAGATATTTAATTTTGCTAACACTCAGCT  
 CTGCCCTCCCTTGTCCCCACCACACATTCTTTGAAATAAGGTTTCAATATACATTTACA  
 TACTATATATATATTTGGCAACTTGTGTTTGTATATAAATATATATATATATATATATGT  
 TTATGTATATATGTGATTCTGATAAAAATAGACATTGCTATTCTGTTTTTTATATGTA  
 AAAAAACAAGAAAAATAGAGAATTCTACATACTAAATCTCTCTCCTTTTTTAATTTAAT  
 ATTTGTTATCATTTATTTATTGGTGTACTGTTTATCCGTAATAATTGTGGGGGAAAAAG  
 ATATTAACATCACGTCTTTGTCTCTAGAGCAGTTTTCCGAGATATTCCGTAGTACATATT  
 TATTTTTAAACAGCAACAAAGAAATACAGATATATCTTAAAAAAGCATTTTGTATT  
 AAAGAATTGAATTCTGATCTCAA

|         | Sequence               | Tm |
|---------|------------------------|----|
| Forward | CCGCAGACGTGTAAATGTTCTT | 60 |
| Reverse | ACTCAAGCTGCCTCGCCTTG   | 62 |

**VEGF-B**

>NM\_011697 NM\_011697 Mus musculus vascular endothelial growth factor B (Vegfb), mRNA. 11/2006

CTCAGGCCGTCGCTGCGGGCGCTGCGTTGCGCTGCCTGCGCCCAGGGCTCGGGAGGGGGCC  
 GCGGAGGAGCCGCCCCCTGCGCCCCGCCCCGGGTCCCCGGGCCCCGCGCCATGGGGCTCTG  
 GCTGCCGCGCCCCACGCCGCGGGCTAGGGCCATGCGGGCGCTCCCGGCGCTCGCCC  
 CCCGCGGGCACCATGAGCCCCCTGCTCCGTGCGCTGCTGCTTGTGCACTGCTGCAGCTG  
 GCTCGCACCCAGGCCCTGTGTCCAGTTTGTATGGCCCCAGCCACCAGAAGAAAGTGGTG  
 CCATGGATAGACGTTTATGCACGTGCCACATGCCAGCCCAGGGAGGTGGTGGTGCCTCTG  
 AGCATGGAACCTCATGGGCAATGTGGTCAAACAACCTAGTGCCCAGCTGTGTGACTGTGCAG  
 CGCTGTGGTGGCTGCTGCCCTGACGATGGCCTGGAATGTGTGCCCACTGGGCAACACCAA  
 GTCCGAATGCAGATCCTCATGATCCAGTACCCGAGCAGTCAGCTGGGGGAGATGTCCCTG  
 GAAGAACACAGCCAATGTGAATGCAGACAAAAAAGGAGAGTGCTGTGAAGCCAGAC  
 AGGGTTGCCATACCCACCACCGTCCCCAGCCCCGCTCTGTTCCGGGCTGGGACTCTACC  
 CCGGGAGCATCCTCCCCAGCTGACATCATCCATCCCACTCCAGCCCCAGGATCCTCTGCC  
 CGCCTTGCACCCAGCGCGTCAACGCCCTGACCCCGGACCTGCCGCTGCCGCTGCAGAC  
 GCCGCCGCTTCTCCATTGCCAAGGGCGGGCTTAGAGCTCAACCCAGACACCTGTAGGT  
 GCCCGAAGCCGCAAGAGTGACAAGCTGCTTTCCAGACTCCACGGGCCCGGCTGCTTTTTAT  
 GGCCCTGCTTACAGGGAGAAGAGTGGAGCAGGCGAACCTCCTCAGTCTGGGAGGTCA  
 CTGCCCCAGGACCTTTTAGAGACTCTCTCGCCATCTTTTATCTCCAGAGCTG  
 CCATCTAACAAATTGTCAAGGAACCTCATGTCTCACCTCAGGGGCCAGGGTACTCTCTCAC  
 TTAACCACCTGGTCAAGTGAGCATCTTCTGGCTGGCTGTCTCCCTCACTATGAAAACC  
 CCAAACCTTCTACCAATAACGGGATTTGGGTTCTGTTATGATAACTGTGACACACACAC  
 ACTCACACTCTGATAAAGAGATGGAAGACTAAC

|  | Sequence | Tm |
|--|----------|----|
|--|----------|----|

|         |                       |    |
|---------|-----------------------|----|
| Forward | CCCGGCTGCTTTTATGGC    | 60 |
| Reverse | AGGAGGTTTCGCCTGTGCTCC | 63 |

VEGF-C

>NM\_009506 NM\_009506 Mus musculus vascular endothelial growth factor C (Vegfc), mRNA. 12/2006

CCGCCACCGAGGGCAGTTCGGATGTCCGGTTTCTGTGAGGCTCGTACCTGACACCCGGG  
AGCCTCTCCCCCGTGTAGGGCTGCCAGAGCCGAGGGCAAAAGTTGCGAGCCCGGAGTCCC  
GGGAGACGCTCGCCAGGGGGTCCCCGGGAGGAAACCACGGGACAGGGACCAGGAGAGG  
ACCTCAGCCTCACGCCCCAGCCTGCGCCAGCCAACGGACCCGGCCTCCCTGCTCCCGGTCC  
ATCCACCATGCACTTGTGTGCTTCTTGTCTCTGGCGTGTTCCTGCTCGCCGCTGCGCT  
GATCCCCAGTCCGCGGAGGGCGCCGCCACCGTCCGCGCCTTCGAGTCCGGACTGGGCTT  
CTCGGAAGCGGAGCCCCGACGGGGGCGAGGTCAAGGCTTTTGAAGGCAAAGACCTGGAGGA  
GCAGTTGCGGTCTGTGTCCAGCGTAGATGAGCTGATGTCTGTCTGTACCCAGACTACTG  
GAAAATGTACAAGTCCAGCTGCGGAAAGGCGGCTGGCAGCAGCCCACCTCAATACCAG  
GACAGGGGACAGTGTAAAATTTGCTGCTGCACATTATAACACAGAGATCCTGAAAAGTAT  
TGATAATGAGTGGAGAAAAGACTCAATGCATGCCACGTGAGGTGTGTATAGATGTGGGGAA  
GGAGTTTGGAGCAGCCACAAACACCTTCTTTAAACCTCCATGTGTGTCCGTCTACAGATG  
TGGGGGTTGCTGCAACAGCGAGGGGCTGCAGTGCATGAACACCAGCACAGGTTACCTCAG  
CAAGACGTTGTTTGAATTAACAGTGCCTCTCTCACAAGGCCCAAACAGTCACAATCAG  
TTTTTGCCAATCACACTTCCCTGCCGGTGCATGTCTAAACTGGATGTTTACAGACAAGTTCA  
TTCAATTATTAGACGTTCTCTGCCAGCAACATTACCACAGTGTGAGGCAGCTAACAAGAC  
ATGTCCAACAACTATGTGTGGAATAACTACATGTGCCGATGCCTGGCTCAGCAGGATTT  
TATCTTTTATTCAAATGTTGAAGATGACTCAACCAATGGATTCCATGATGTCTGTGGACC  
CAACAAGGAGCTGGATGAAGACACCTGTGAGTGTGTCTGCAAGGGGGGGCTTCGGCCATC  
TAGTTGTGGACCCCAAAAGAACTAGATAGAGACTCATGTGAGTGTGTCTGTAAAAACAA  
ACTTTTCCCTAATTCATGTGGAGCCAACAGGGAATTTGATGAGAATACATGTGAGTGTGT  
ATGTAAAAGAACGTGTCCAAGAAATCAGCCCCTGAATCCTGGGAAATGTGCCTGTGAATG  
TACAGAAAACACACAGAAGTGTCTTCTTAAAGGGAAGAAGTTCCACCATCAAACATGCAG  
TTGTTACAGAAGACCGTGTGCGAATCGACTGAAGCATTGTGATCCAGGACTGTCCTTTAG  
TGAAGAAGTATGCCGCTGTGTCCCATCGTATTGAAAAGGCCACATCTGAACTAAGATCA  
TACCAGTTTTCAGTCCACCAATTTACTCTCTTGAAGAAGTGTGCCACATTAGCACTGTC  
TATGCACAGAAAAGACTCTGTGGGACCATGGTAACAGAGGCCCAAGTCTGTGTTTATTGAA  
CCATGTGGATTACTGCGGGAGAGGACTGGCACTCATGTGCAAAAAAACCTCTTCAAAGAC  
TGGTTTTCTGCCAGGGACCAGACAGCTGAGGTTTTTCTCTTGTGATTTAAAAAAGAATG  
ACTATATAATTTATTTCCACTAAAAATATTGTTTCTGCATTCAATTTTTATAGCAATAACA  
ATTGGTAAAGCTCACTGTGATCAGTATTTTTATAACATGCAAAACTATGTTTAAAAATAAA  
ATGAAAATTGTATTATAAGCT

|         | Sequence               | Tm |
|---------|------------------------|----|
| Forward | GGCCCCAAACCAGTCACAA    | 60 |
| Reverse | TAGACATGCACCCGGCAGGAAG | 62 |

B7-1

>NM\_009855 NM\_009855 Mus musculus CD80 antigen (Cd80), mRNA. 2/2007

GAGTTTTATACCTCAATAGACTCTTACTAGTTTCTCTTTTTTCAGGTTGTGAAACTCAACC  
TTCAAAGACACTCTGTTCCATTTCTGTGGACTAATAGGATCATCTTTAGCATCTGCCGGG  
TGGATGCCATCCAGGCTTCTTTTTCTACATCTCTGTTTCTCGATTTTTGTGAGCCTAGGA  
GGTGCCTAAGCTCCATTGGCTCTAGATTCTGGCTTTCCCATCATGTTCTCAAAGCAT  
CTGAAGCTATGGCTTGCAATTGTCAGTTGATGCAGGATACACCCTCTCAAGTTTTCCAT  
GTCCAAGGCTCATTCTTCTTTGTGCTGCTGATTTCGTCTTTCACAAGTGTCTTCAGATG  
TTGATGAACAAGTGTCCAAGTCAGTGAAGATAAGGTATTGCTGCCTTGCCGTTACAAC  
CTCCTCATGAAGTGTGAGTCTGAAGACCGAATCTACTGGCAAAAACATGACAAAGTGGTGC  
TGTCTGTCAATGCTGGGAACTAAAAGTGTGGCCCTGGAGTATAAGAACCGGACTTTATATG  
ACAACACTACTACTCTTATCATCTTGGCCTGGTCTTTTCAGACCGGGGCACATACA  
GCTGTGTGCTTCAAAGAAGGAAAGAGGAACGTATGAAGTTAAACACTTGGCTTTAGTAA  
AGTTGTCCATCAAAGCTGACTTCTCTACCCCCAACATAACTGAGTCTGGAAAACCCATCTG

CAGACACTAAAAGGATTACCTGCTTTTGGCTTCCGGGGGTTTTCCCAAAGCCTCGCTTCTCTT  
GGTTGGAAAATGGAAGAGAATTACCTGGCATCAATACGACAATTTCCCAGGATCCTGAAT  
CTGAATTGTACACCATTAGTAGCCAAGTACTAGATTTCAATACGACTCGCAACCACACCATTA  
AGTGTCTCATTAAATATGGAGATGCTCACGTGTCAGAGGACTTCACCTGGGAAAAACCCC  
CAGAAGACCCTCCTGATAGCAAGAACACACTTGTGCTCTTTGGGGCAGGATTCGGCGCAG  
TAATAACAGTCGTCGTCATCGTTTGTTCATCATCAAATGCTTCTGTAAAGCACAGAAGCTGTT  
TCAGAAGAAAATGAGGCAAGCAGAGAAAACAAACAGCCTTACCTTCGGGCCTGAAGAAG  
CATTAGCTGAACAGACCGTCTTCTTTTAGTTCCTTCTGTCCATGTGGGATACATGGTAT  
TATGTGGCTCATGAGGTACAATCTTTCTTTTTCAGCACCGTGCTAGCTGATCTTTTCGGACAA  
CTTGACACAAGATAGAGTTAACTGGGAAGAGAAAAGCCTTGAATGAGGATTTCTTTCCATC  
AGGAAGCCTACGGGCAAGTTTGTCTGGGCCTTTGATTGCTTGATGACTGAAGTGGAAAGGC  
TGAGCCCAGTGTGGGTGGTGTGCTAGCCCTGGGCAGGGGCAGGTGACCTGGGTGGTATAAG  
AAAAAGAGCTGTCACTAAAAGGAGAGGTGCCTAGTCTTACTGCAACTTGATATGTCATGT  
TTGGTTGGTGTCTGTGGGAGGCCTGCCCTTTTCTGAAGAGAAGTGGTGGGAGAGTGGATG  
GGGTGGGGGCAGAGGAAAAGTGGGGGAGAGGGCCTGGGAGGAGAGGAGGGAGGGGGACGG  
GGTGGGGGTGGGGAAAATATGGTTGGGATGTAAAAACGATAATAATATAAATATTTAAAT  
AAAAAGAGAGTATTGAGCAAA

|         | Sequence                  | Tm |
|---------|---------------------------|----|
| Forward | TTCAGAAGAAAATGAGGCAAGCAGA | 61 |
| Reverse | CTAATGCTTCTTCAGGCCCGA     | 60 |

B7-2

>NM\_019388 NM\_019388 Mus musculus CD86 antigen (Cd86), mRNA. 1/2007

CAGACGCGTAAGAGTGGCTCCTGTAGGCAGCACGGACTTGAACAACCAGACTCCTGTAGA  
CGTGTTCAGAACTTACGGAAGCACCCATGATGGACCCAGATGCACCATGGGCTTGGCA  
ATCCTTATCTTTGTGACAGTCTTGTGCTGATCTCAGATGCTGTTTCCGTGGAGACGCAAGCT  
TATTTCAATGGGACTGCATATCTGCCGTGCCATTTACAAAAGGCTCAAAAACATAAGCCTG  
AGTGAGCTGGTAGTATTTTGGCAGGACCAGCAAAAGTTGGTTCTGTACGAGCACTATTTG  
GGCACAGAGAAAATGATAGTGTGAATGCCAAGTACCTGGGCCGACGAGCTTTGACAGG  
AACAACCTGGACTCTACGACTTCACAATGTTTCAAGTCAAGGACATGGGCTCGTACGATTGT  
TTTTATACAAAAAAGCCACCCACAGGATCAATTATCCTCCAACAGACATTAACAGAGCTG  
TCAGTGATCGCAACTTCAGTGAACCTGAAATAAAAATGGATCAGAATGTAACAGGAAAT  
TCTGGCATAAAATTTGACCTGCATGTCTAAGCAAGGTCAACCCGAAACCTAAGAAGATGTAT  
TTTCTGATAAATAATTCAACTAATGAGTATGGTGATAACATGCAGATATCACAAGATAAT  
GTCACAGAACTGTTTCAAGTATCTCCAACAGCCTCTCTCTTTTCAATCCCGGATGGTGTGTGG  
CATATGACCGTTGTGTGTGTTCTGGAAAACGGAGTCAATGAAGATTTCTTCCAAAACCTCTC  
AATTTCACTCAAGAGTTTCCATCTGCTCAAACGTATTGGAAGGAGATTACAGCTTCAAGTT  
ACTGTGGCCCTCCTCCTTGTGATGCTGCTCATCATTGTATGTCACAAGAAGCCGAATCAG  
CCTAGCAGGCCAGCAACACAGCCTCTAAGTTAGAGCGGGATAGTAACGCTGACAGAGAG  
ACTATCAACCTGAAGGAACTTGAACCCCAAATTTGCTTTCAGCAAAAACCAAATGCAGAGTGA  
AGGCAGTGAGAGCCTGAGGAAAGAGTTAAAAAATGCTTTGCTTGAATAAGAAGTGCAGA  
GTTTCTCAGAATTCAAAATGTTTCTCAGCTGATTGGAATTTCTACAGTTGAATAATTAAG  
AACAAAATACACAACAGTGTCCATATTTTATCCTGTTTCTTTTCCAAGTTTTTGGGCAAT  
GTCAATTTGTGTCCTTATGCCAGGAGCAGACATCTATTTTGTCTTTGCTTTGTTTAACTCA  
GTGCACACTCATAGGCCAAGAGCACTGAAATGGCTTCTTTTCCAGGAATAACATTTTGGGA  
TCAATCTCTCCTACTTGAGATCAGATTCTTCTTCTAATTTTGCATAGTGTGTTTTTATAT  
GGAACCTCCTTGTGTAGGAATACTGGCTTTTATCTGTCTTGCACACTTGCATACTTATAT  
ACTTATACCTGGACAGCTACCTCTTCAAGTCAAGGATGGGAGTGGTATATTTGGTGTGTTA  
TTTTGATGTGTTTCGTGTTGCTATCTTAAAACAGCAAAGAGCATATACTATAGTAGCTCAAC  
TACAATGATCTAGAGAAAAGACCCAGCACTTATAAGAAAACACTGTCCCTCCATCAGGGTCA  
ATAATGAATACAATGACCTAAGTAATATACAGGTGACAGCAACAGCACAGAGTTCTCAGT  
GCTGGCAAAATCAAGAAAACAAAATATGGAACCATCTCTAGATCCAAGAGCCATTCTCACC  
TGGGCTGCCACAGATACTGGAAGAATCCACCTGCCTGGCCAGCAAGTCACAACCTTAGCAG  
GCAGCACTGAAGAAAAGCAAGATGTAAGTGTACTGATGCCCTTTTAAAGAAAATGCCTGGAAAAGT  
TGGAGAATGCTGTGCAAGGATAAGACAGCCAAAGTACTCAAAAACAGGAGACATCACTAGA  
ATCCAACCAACAAATGTTTATGGAAGGACTGATCTGCCAGTCCATTGAAAAGTCAAGAG  
GTCAGAGATAGACCAGTGTGTCTCAATGGATGTAGATATCAGCCACCTCGGTGCTCAACA  
GGTATTTTTATGATCTCCTTGTTCAAATTCATCTAGATGTAGAGCTAGGGAGAGAGCAGT

CACATTGATGAAAGGCTAGGACTCTTTTCAGCTCATGGCTTGTGTGGAAGGAGGGAAAGCA  
 GAAATCACAACTCTGAGACTACTGTAGTCTGCAGATACCTGAGTGGGTGTGGCTTGGC  
 CTTTCAAAGGACAAAGAGCAACTAATGCTGAAAGCACATAGTGTATCTATACGGCATGGA  
 ATAGTCATCACCCAGACTTAAAGAGAACTTTGGCAGGTCTGAGCAGCAAAATATTGTTGT  
 TTCCATTTTACATAAAGGGCCCTGGAGGGCTATAGACTATTCCGCTGGCAGGGCTCATGC  
 TTGTAATGTGTCCATCTTGATTACCCCTGTGCAGACTCTTAAGATCTGGCCAGTTACCAA  
 CATGTTCTGTACAGAGTGGATTTCAATAAAGTTTTTCTTGAATTTTTTAAAAAAAAAAAAA  
 AAAAAAA

|         | Sequence                | Tm |
|---------|-------------------------|----|
| Forward | GCCTCTCTCTTTCATTCCCGGAT | 63 |
| Reverse | ACTCCGTTTCCAGAACACACACA | 60 |

IL-10

>NM\_010548 NM\_010548 Mus musculus interleukin 10 (Il10), mRNA. 2/2007

GGGGGGGGGATTTAGAGACTTGTCTTTCAGCTACTACCAAAGCCACAAAGCAGCCTTGCAGA  
 AAAGAGAGCTCCATCATGCCTGGCTCAGCACTGCTATGCTGCCTGCTCTTACTGACTGGC  
 ATGAGGATCAGCAGGGGCCAGTACAGCCGGGAAGACAATAACTGCACCCACTTCCCAGTC  
 GGCCAGAGCCACATGCTCCTAGAGCTGCGGACTGCCTTCAGCCAGGTGAAGACTTTCTTT  
 CAAACAAAGGACCAGCTGGACAACATACTGCTAACCGACTCCTTAATGCAGGACTTTAAG  
 GGTTACTTGGGTTGCCAAGCCTTATCGGAAATGATCCAGTTTTTACCTGGTAGAAGTGATG  
 CCCAGGCAGAGAAGCATGGCCAGAAATCAAGGAGCATTGAAATCCCTGGGTGAGAAG  
 CTGAAGACCTCAGGATGCGGCTGAGGCGCTGTCATCGATTTCTCCCTGTGAAAATAAG  
 AGCAAGGCAGTGGAGCAGGTGAAGAGTGATTTTAATAAGCTCCAAGACCAAGGTGTCTAC  
 AAGGCCATGAATGAATTTGACATCTTCATCAACTGCATAGAAGCATAACATGATGATCAAA  
 ATGAAAAGCTAAAACACCTGCAGTGTGTATTGAGTCTGCTGGACTCCAGGACCTAGACAG  
 AGCTCTCTAAATCTGATCCAGGGATCTTAGCTAACGGAAACAACCTCTTGGAAAACCTCG  
 TTTGTACCTCTCTCCGAAATATTTATTACCTCTGATACCTCAGTTCCCATTCTATTTATT  
 CACTGAGCTTCTCTGTGAACTATTTAGAAAAGCCCAATATTATAATTTTACAGTATTT  
 ATTATTTTTAACCTGTGTTTAAAGCTGTTTCCATTGGGGACACTTTATAGTATTTAAAGGG  
 AGATTATATTATATGATGGGAGGGGTTCTTCTTGGGAAGCAATTGAAGCTTCTATTCTA  
 AGGCTGGCCACACTTGAGAGCTGCAGGGCCCTTTGCTATGGTGTCTTTCAATTGCTCTC  
 ATCCCTGAGTTACAGACTCCTAAGAGAGTTGTGAAGAACTCATGGGTCTTGGGAAGAGA  
 AACCAGGAGATCAGTTTGTATGATCATTCTGAGCAGCTCAGAGGGTTCCCCTACTGTCA  
 TCCCCAGCCGCTTTCATCCCTGAAAACCTGTGGCCAGTTTGTATTATAAACCCTAAAA  
 TTAGTTCTAATAGAAGCTATTTTAACTAGAAGTAATGCAATTCCTCTGGGAATGGTGTA  
 TTGTTTGTCTGCCTTTGTAGCAGCATCTAATTTTGAATAAATGGATCTTATTTCG

|         | Sequence                  | Tm |
|---------|---------------------------|----|
| Forward | GGATGCGGCTGAGGCG          | 61 |
| Reverse | CACTGCCTTGCTCTTATTTTCACAG | 60 |

MEK1

>NM\_008927 NM\_008927 Mus musculus mitogen activated protein kinase kinase 1 (Map2k1), mRNA. 12/2006

GAGTCCCTCACTGGGACGTCTGTGCGCGGCGTCTCGGAGCGCCGGAGCAGCGGTGGCCGC  
 ACTTTCTCCAAGCTGGGGCTGTAGCTGAGCTGTGGGTAGTGCAGGGAGCCGTCCGAGC  
 CCGAGGAACCGGTGTGCTGAGGCGAGAGTTCCCGGCCGGCGAGCGCGCAGCTGGTTCT  
 CCGCGTGGGTTGGGCGGAGGGTCCCAGGAGCGCGGCGTTGATCGAGCCGCCCGACTCTG  
 GGCAGAGCCGAGGGAGGAAGCGAGAAGCGGCCGCGCGCTCCCTGCTGAGTTGCAGGCTCT  
 TTCCCGGCTGCAAGATGCCCAAGAAGAAGCCGACGCCCATCCAGCTGAACCCGGCCCCCG  
 ATGGCTCGGCGGTTAACGGGACCAGCTCGGCCGAGACCAACCTGGAGGCCTTGCAGAAGA  
 AGCTGGAGGAGCTGGAGCTTGACGAGCAGCAGCGGAAGCGGCTCGAGGCCTTTCTGACGC  
 AGAAGCAGAAGGTGGGGAACTGAAGGATGATGACTTTGAGAAGATCAGCGAACTGGGAG  
 CTGGCAACGGTGGAGTGGTCTTCAAGGTCTCCACAAGCCATCTGGCCTGGTTATGGCTA  
 GAAAGCTGATCCACCTGGAGATCAAACCCGCAATCCGGAACCAGATCATCCGGGAGCTGC  
 AGGTACTGCACGAGTGCAACTCCCCGTACATCGTGGGCTTCTACGGGGCCTTCTACAGCG  
 ACGGCGAGATCAGCATCTGCATGGAGCACATGGATGGTGGGTCCCTTGGATCAAGTTCTGA

AGAAAGCTGGAAGAATTCCTGAGCAAATTTTAGGAAAAGTTAGCATTGCTGTGATAAAAAG  
GCCTGACCTATCTTCGGGAGAAGCACAAAGATTATGCACAGAGATGTCAAGCCATCCAACA  
TTCTAGTGAACCTCACGTGGGGAGATCAAACCTCTGTGATTTTGGGGTCAGCGGGCAGCTAA  
TTGACTCTATGGCCAACCTCCTTCGTGGGCACGAGATCCTACATGTGCGCTGAGAGACTCC  
AGGGGACTCACTACTCTGTGCAGTCGGACATCTGGAGCATGGGGCTCTCTCTGGTGGAGA  
TGGCAGTTGGGAGATACCCCATTCCTCCTCCTGATGCCAAGGAGCTGGAGCTACTGTTTG  
GATGCCATGTGGAAGGAGACGCAGCCGAAAACACCACCAGGCCAAGGACCCCTGGGAGGC  
CTCTCAGCTCATATGGAATGGACAGCCGACCTCCCATGGCAATTTTTGAGTTGTTGGATT  
ACATTGTCAATGAGCCTCCTCCAAAACCTGCCAGTGGAGTATTAGTCTGGAGTTTCAGG  
ATTTTGTGAATAAATGCTTAATAAAGAACCCTGCAGAGAGAGCAGATCTGAAGCAGCTCA  
TGGTACATGCTTTTCATCAAAGATCTGACGCCGAGGAGGTAGACTTCGCAGGCTGGCTCT  
GCTCCACCATTTGGGCTTAACCAGCCCAGCACACCAACCCACGCTGCCAGCATCTGAGCCT  
TTAGGAAGCAGCAAAGAGGAATTTCTCTGCCAGTGGCATGCCATGTTGCTTTTCAGGCCTC  
TCCCATGCTTGTCTATGTTTCAGACGTGCATCTCATCTGTGACAAAAGGATGAAGAACACAG  
CATGTGCCAAAATGTACTTGTGTCAATTTTTAATATCATTGTCTTTATCACTATGGTTACT  
CCCCAAGTGGATTGGCTTTGTGCTTGGGGCTATTTGTCTGTTTCATCAAACACATGCCAG  
GCTGAACTACAGTGAACCCCTAGTGACCTGGGTGGTTCGTTCTTACTGATGTTTGCAGTGC  
TGTTTCATCGTACTCACTAGCTGGCTGCCTGTATTGTGAGGATTCTCGACCTTGGTACT  
TCACTCTTGTGGTGCCTCTCAGTCTGAGAGGGAGCCTTGTGAGACCCTTCACAGGCAG  
TGCATGCATGGAAGCATGCTTTGCTGCTACTGAAATGAGCATCAGAACGTGTACGTCAT  
GGTATTTTTTATTTTTTGTCTTTTGGTATAGAACTCAGCAATTTCCATCAAAAAACCTAAG  
CAGAGCCCATCACTGCCATGATAGCTGGGCTTCAGTCTGTCTACTGTGGTGAATTTTAGA  
CTTCTGGTTGTATTTCTATATTTATTTTTAAATATACAGTGTGGGATACTTAGTGGTGTG  
TGTCTCTAAGTTTGGATTAGTGTCTTAAATTTGGTGGTTATTTTTGAATGTCACAAATGGA  
TTAAAGCATCAATGTATCAAGAGTTCTATCTTTCTTCCAGTCTAAGTACCAATGCTATTG  
TAAACAACGTGTATAGTGCCTACAAATTTGTATGAAACCCCTTTTAAACACTTTAATCAAG  
ATGTTTATCAAATCTAATCTTATTCTAATAAAAAATACTATCAAGTT

|         | Sequence               | Tm |
|---------|------------------------|----|
| Forward | TGGGGTCAGCGGGCA        | 60 |
| Reverse | GGCGACATGTAGGATCTCGTGC | 63 |

### TLR1

>NM\_030682 NM\_030682 Mus musculus toll-like receptor 1 (Tlr1), mRNA. 11/2006  
GGTTCCGTGATGCACAGCTCCTTGGTTTTAATGAGTGTGTTGTGAATGCAGTTGGTGAAGA  
ACTCAGGCGAGCAGAGGCAATTGTGGACACCCCTACAGAAACGTCTATACCCATGTGGC  
AATGCTCTGAAGAATAGCAGGGACCTCAGGAATGTCTATGGCCATAACAATGACTAAACCA  
AATTCCCTCATCTTCTACTGTATCATTGTTTTAGGACTGACACTTATGAAAAATCCAATTA  
TCTGAGGAATGTGAGCTTATCATAAAGAGGGCCAAACGCAAACCTTACCAGAGTGCCCAAG  
GACCTACCCTTGCAAACAACACTTTAGATCTATCAAAAACAATATATCTGAGCTTCAG  
ACTTCTGACATCCTCTCATTGTCCAAGCTGAGGGTCTGATAATGTCTACAACAGACTC  
CAGTATCTTAATATCAGTGTTTTTCAAATTCACACAGAGCTGGAATATTTGGATTTGTCC  
CACAATGAGCTAAAGGTGATCTTGTGCCACCCACAGTCAGCCTCAAGCATTTGGACCTC  
TCCTTTAATGCCTTTGATGCCCTGCCTATATGCAAAGAATTTGGCAACATGTCCCAACTA  
CAGTTCCCTGGGGTTGAGCGGTTCTCGGGTACAAAAGTTCAAGTGTGCAGCTGATTGCTCAT  
TTGAACATCAGTAAGGTTTTGCTGGTGTAGGAGATGCTTATGGGGAAAAAGAAGACCCC  
GAATCTCTTCGGCACGTTAGCACTGAGACTCTGCATATTGTTTTCCCGTCGAAAAGAGAA  
TTCCGTTTTCTTCTGGATGTGTCCGTGAGCACTACGATCGGTTTGGAACTGTCTAACATC  
AAGTGTGTGCTTGAAGACCAGGGCTGCTCTTATTTCTTACGTGCTTTGTCAAAGCTTGGGA  
AAGAATCTGAAGCTCTCAAATCTTACCCTGAACAATGTGGAAACAACGTGGAATTCCTTC  
ATTAATATCCTCCAGATAGTTTGGCATAACCCAGTCAAATATTTCTCAATTTCAAATGTG  
AAGCTACAAGGTCAACTTGCCTTCAGGATGTTCAATTATTCTGACACTTCTCTGAAGGCT  
TTGTGATACAGTCAAGTTGTCACTGATGCTTTCAGCTTCCCCCAAAGTTACATATACAGT  
ATCTTTGCCAATATGAACATCCAAAACCTTACAATGTCTGGAACACACATGGTCCACATG  
CTGTGCCCCGTCCCAAGTTAGCCATTTCTGCATGTGGACTTTACAGATAACCTTTTAAACA  
GACATGGTTTTTAAAGACTGTAGAAACTTAGTTAGATTGAAAAACTTAGTTTACAAAAAG  
AATCAGTTAAAAACCTTGGAAATATAATCCTCACATCTGCAAAGATGACATCCCTACAA  
AAACTAGACATTAGCCAGAATTTCTAAGGTACAGCGATGGGGGAATCCCATGCGCCTGG  
ACCCAGAGTTTGTAGTTTTAAATTTGTCTTTCGAATATGCTTACAGGCTCTGTCTTCAGA  
TGCTTACCTCCCAAAGTCAAGGTCCTTGACCTTCACAACAACAGGATAATGAGCATCCCT

AAAGATGTCACCCACCTGCAGGCTTTGCAGGAACTCAATGTAGCATCCAACCTCCTTAACT  
 GACCTTCCTGGGTGCGGGCCTTCAGCAGCCTTTCTGTGCTGGTCATCGACCATAACTCA  
 GTTTCCCATCCCTCTGAGGATTTCTTCCAGAGCTGTCAGAATATTAGATCCCTAACAGCG  
 GGAAACAACCCATTCCAATGCACATGTGAGCTGAGGGACTTTGTCAAGAACATAGGCTGG  
 GTAGCAAGAGAAGTGGTGGAGGGCTGGCCTGACTCTTACAGGTGTGACTACCCAGAAAGC  
 TCTAGGGGAACTGCACTGAGGGACTTCCACATGTCTCCACTATCCTGTGATACTGTTCTG  
 CTGACTGTCACCATCGGGGCCACTATGCTGGTGTGCTGGCTGTCACTGGGGCTTTTCTCTGT  
 CTCTACTTTGACCTGCCCTGGTATGTGAGGATGCTGTGTGTCAGTGGACACAGACCAGGCAC  
 AGGGCCAGGCACATCCCCTTAGAGGAACTCCAGAGAAACCTCCAGTTCCATGCTTTTTGTC  
 TCATACAGTGGGCATGATTCTGCCTGGGTGAAGAACGAATTAACCTACCCAACTAGAGAAA  
 GATGACATCCAGATTTGCCTCCATGAGAGGAACTTTGTCCCTGGCAAGAGCATTGTGGAG  
 AACATCATCAATTTTCATTGAGAAGAGTTACAAGTCCATCTTTGTGCTGTCTCCCCACTTC  
 ATCCAGAGTGTGGTGTGTCATTATGAACTCTATTTTGGCCATCACAATCTCTTCCATGAA  
 GGCTCTGATAACTTAATCCTCATCTTGTGTCACCCATTCCCCAGTACTCCATCCCTACC  
 AATTACCACAAGCTCAAACTCTCATGTACGAAGGACCTATCTGGAATGGCCACAGAG  
 AAGAACAAGCATGGACTTTTTTGGGCAAACCTAAGAGCATCCATTAATGTTAAGCTGGTT  
 AACCAGGCAGAAGGAACGTGTTACACACAGCAATAAGAATATCCACC

|         | Sequence               | Tm |
|---------|------------------------|----|
| Forward | TCCTGGGGTTGAGCGGTTTC   | 62 |
| Reverse | TTCAAATGAGCAATCAGCTGCA | 60 |

TLR2

>NM\_011905 NM\_011905 Mus musculus toll-like receptor 2 (Tlr2), mRNA. 2/2007

CGGAGCCTCTGGACTTTTCAGTTCTGTTTTGCCTGCCCTGTGGCTCCTGCCAGCTCTGATG  
 CCAGGCTCCGTTCCCTTTCAGACCCCTGTGGGCGGGCCTTGCCGCACCGGGGGCGGTGC  
 TGGCGACCGGGAAGTTCCGGGGCCCTGACCTGGGGACATCCCCTTCCCTCACTTCCAGGTC  
 TTCAGTCTTCCCTAGGCTGGTGGCCAGATGGCTAGTGGGCACGGGGAGCGGGCGGTGGAGG  
 ACTCCTAGGCTCCGGGCAGGCGGTCACTGGCAGGAGATGTGTCCGCAATCATAGTTTCTG  
 ATGGTGAAGGTTGGACGGCAGTCTCTGCGACCTAGAAGTGGAAAAGATGTGTTCAAGGA  
 GGTGCGGACTGTTTTCTTCTGACCAGGATCTTGTCTTCTGAGTGTAGGGGCTTCACTTCTC  
 TGCTTTTTCGTTTCATCTCTGGAGCATCCGAATTCATCACCGGTGAGAAAACAACCTTACCG  
 AAACCTCAGACAAAACGCTCAAATCTCAGAGGATGCTACGAGCTCTTTGGCTCTTCTGGAT  
 CTTGGTGGCCATAACAGTCCCTCTTCAGCAAACGCTGTTCTGCTCAGGAGTCTCTGTCTATG  
 TGATGCTTCTGGGGTGTGTGATGGCCGCTCCAGGTCTTTCACCTCTATTCCCTCCGGACT  
 CACAGCAGCCATGAAAAGCCTTGACCTGTCTTTCAACAAGATCACCTACATTGGCCATGG  
 TGACCTCCGAGCGTGTGCGAACCTCCAGGTTCTGATTTTGAAGTCCAGCAGAATCAATAC  
 AATAGAGGGAGACGCTTTTATTCTCTGGGCAGTCTTGAACATTTGGATTTGTCTGATAA  
 TCACCTATCTAGTTTATCTTCCCTCGGTTCCGGGCCCTTTTCTCTTTGAAATACTTAAA  
 CTTAATGGGAAATCCTTACCAGACACTGGGGGTAACATCGCTTTTTTCCAATCTCACAAA  
 TTTACAAAACCTCAGGATAGGAAATGTAGAGACTTTTCAGTGTAGATAAGGAGAATAGATTT  
 TGCTGGGCTGACTTCTCTCAATGAACTTGAATTAAGGCATTAAGTCTCCGGAATTATCA  
 GTCCCAAAGTCTAAAGTGCATCCGCGACATCCATCACCTGACTCTTCACTTAAGCGAGTC  
 TGCTTTCTGCTGGAGATTTTTCAGATATTCTGAGTCTGTGAGATATTTAGAATAAG  
 AGATACTAACTTGGCCAGGTTCCAGTTTTTACCACCTGCCCCGTAGATGAAGTCAGCTCACC  
 GATGAAGAAGCTGGCATTCGAGGCTCGGTTCTCACTGATGAAAAGCTTTAACGAGCTCCT  
 GAAGCTGTTGCGTTACATCTTGGAACTGTCCGAGGTAGAGTTCGACGACTGTACCCTCAA  
 TGGGCTCGGCGATTTTCAACCCCTCGGAGTCAGACGTAGTGAGCGAGCTGGGTAAAGTAGA  
 AACAGTCACTATCCGGAGGTTGCATATCCCCAGTTCATTTGTTTTATGACCTGAGTAC  
 TGTCTATTCCCTCCTGGAGAAGGTGAAGCGAATCACAGTAGAGAACAGCAAGGTCTTCTCT  
 GGTTCCTGCTCGTTCTCCAGCATTTAAAATCATTAGAATCTTAGACCTCAGCGAAAA  
 TCTGATGGTTGAAGAATATTTGAAGAACTCAGCCTGTAAGGGAGCCTGGCCTCCTCTACA  
 AACCTTAGTTTTGAGCCAGAATCATTGAGATCAATGCAAAAAACAGGAGAGATTTTGTCT  
 GACTCTGAAAAACCTGACCTCCCTTGACATCAGCAGGAACACTTTTTTCATCCGATGCCCGA  
 CAGCTGTGAGTGGCCAGAAAAGATGCGCTTCTGAAATTTGTCCAGTACAGGGATCCGGGT  
 GGTAAAAACGTGCATTCTCAGACGCTGGAGGTGTTGGATGTTAGTAACAACAATCTTGA  
 CTCATTTTTCTTTGTTCTTGCCTCGGCTGCAAGAGCTCTATATTTCCAGAAAATAAGCTGAA  
 AACACTCCAGATGCTTCTGTTTCCCTGTGTTGCTGGTCATGAAAATCAGAGAGAATGC  
 AGTAAGTACTTTCTCTAAAGACCAACTTGGTTCTTTTCCAAAACCTGGAGACTCTGGAAGC



AGGCGACAACCACTTTTGTGGCTCCTGCGAACTCCTATCCTTTACTATGGAGACGCCAGC  
TCTGGCTCAAATCCTGGTTGACTGGCCAGACAGCTACCTGTGTGACTCTCCGCCTCGCCT  
GCACGGCCACAGGCTTCAGGATGCCCGGCCCTCCGTCTTGGAAATGTCACCAGGCTGCACT  
GGTGTCTGGAGTCTGCTGTGCCCTTCTCCTGTTGATCTTGCTCGTAGGTGCCCTGTGCCA  
CCATTTCCACGGGCTGTGGTACCTGAGAATGATGTGGGCGTGGCTCCAGGCCAAGAGGAA  
GCCCAAGAAAGCTCCCTGCAGGGACGTTTGTATGATGCCTTTGTTTCTTACAGTGAGCA  
GGATTCCCATTGGGTGGAGAACCTCATGGTCCAGCAGCTGGAGAACTCTGACCCGCCCTT  
TAAGCTGTGTCTCCACAAGCGGGACTTTCGTTCCGGGCAAATGGATCATTGACAACATCAT  
CGATTCCATCGAAAAGAGCCACAAAACCTGTGTTTCGTGCTTTCTGAGAACTTCGTACGGAG  
CGAGTGGTGAAGTACGAACTGGACTTCTCCACTTCAGGCTCTTTGACGAGAACAACGA  
CGCGGCCATCCTTGTTTTGTGGAGCCCATTGAGAGGAAAGCCATTCCCGAGCGCTTCTG  
CAAACGCGCAAGATAATGAACACCAAGACCTACCTGGAGTGGCCCTTGGATGAAGGCCA  
GCAGGAAGTGTTTTGGGTAAATCTGAGAACTGCAATAAAGTCTAGGTTCTCCACCCAGT  
TCCTGACTTCTTAACTAAGGTCTTTGTGACACAAAACCTGTAACAAAAGTTTATAAGTAACA  
TAGAATTGTATTATTGAGGATATTAAGTATGGGTTTTGTCTTGAATACTGTTATATAAAT  
ATGTGACATCAGGAAAAAAAAAAAAAAAAAAAAAAAAAAAAAAAAAAAAA

|         | Sequence           | Tm |
|---------|--------------------|----|
| Forward | GCCCTGTGCCACCATTTC | 62 |
| Reverse | GCCACGCCACATCATTCT | 60 |

### TLR3

>NM\_126166 NM\_126166 Mus musculus toll-like receptor 3 (Tlr3), mRNA. 2/2007

GAACATTTCTGCTGGAAAACCTGGATGGCCATTTTTACCTAAGAGATTAAGTTCGACTTT  
ACTCATTTTGC AAAAGAAGATAAAGCGAGTTTCACTTTT CAGGCTGAAAGGAAATGTGTGAT  
TTAAAAAAAAAAGTCTGAATGAAAACCTAAGGGGATGCAGGACCTCAGGCTGAGTAAAATC  
AGAATGTACTTTGGCTTTTGTAGGTTGACGCACCTGTTCTCTATCTGGGAAGTTAAACTGCC  
TGAATCACAAATCGCGCACCAAAAAGAAGATAGAAGATGATGCAGTCTTTCCAGAGGGATAG  
ATGTTACCTAAGCAAGGAGTAGAATATGATACAGGGATTGCACCCATAATCTGGGCTGAA  
TCATGAAAGGGTGTTCCTCTTATCTAATGTACTCCTTTGGGGGACTTTTGTCCCTATGGA  
TTCTTCTGGTGTCTTCCACAAAACCAATGCACTGTGAGATACAACGTAGCTGACTGCAGCC  
ATTTGAAGCTAACACACATACCTGATGATCTTCCCTCTAACATAACAGTGTGTAATCTTA  
CTCACAAACCACTCAGAAGATTACCACCTACCAACTTTACAAGATACAGCCAACTTGCTA  
TCTTTGGATGCAGGATTTAACTCCATTTCAAACCTGGAGCCAGAATGTGCCAAATACTCC  
CTTTGTGTGAAAGTATTGAACCTGCAACATAATGAGCTCTCTCAGATTTCTGATCAAACCT  
TTGTCTTCTGCACGAACCTGACAGAACCTCGATCTAATGTCTAACTCAATACACAAAATTA  
AAAGCAACCCCTTTCAAAAACCGAAGAATCTAATCAAATTAGATTTGTCTCATAATGGTT  
TATCATCTACAAAGTTGGGAACGGGGTCCAACCTGGAGAACCTCCAAGAACTGCTCTTAG  
CAAAAATAAAAATCCTTGCCTTGCGAAGTGAAGAACCTTGAGTTTCTTGGCAATTCTTCTT  
TACGAAAGTTGGACTTGTCTCAATCCACTTAAAGAGTTCTCCCGGGGTGTTTCCAGA  
CAATTGGCAAGTTATTTCGCCCTCTCTTGAACAACGCCAACTGAACCCACCTCACAG  
AGAAGCTTTGCTGGAACTTTCAAACACAAGCATCCAGAATCTCTCTCTGGCTAACCAAC  
AGCTGCTGGCCACCAGCGAGAGCACTTTCTCTGGGCTGAAGTGGACAAATCTCACCCAGC  
TCGATCTTTCTTACAACAACCTCCATGATGTGCGCAACGGTTCTTCTCTCTATCTCCCAA  
GCCTGAGGTATCTGTCTCTGGAGTACAACAATATACAGCGTCTGTCCCTCGCTCTTTTTT  
ATGGACTCTCCAACCTGAGGTACCTGAGTTTGAAGCGAGCATTTACTAAGCAAAGTGTTT  
CACTTGCTTACATCCCAACATTGACGATTTTTCTTTCAATGGTTAAAATATTTGGAAT  
ATCTCAACATGGATGACAATAATATTCCAAGTACCAAAAAGCAATACCTTACGGGATTGG  
TGAGTCTGAAGTACCTAAGTCTTTCCAAAACCTTTCACAAGTTTGCAAACTTTAACAAATG  
AAACATTTGTGTCACTTGTCTCATTCTCCCTTGTCTCACTCTCAACTTAACGAAAAATCACA  
TCTCAAAAATAGCAAATGGTACTTTCTCTTGGTTAGGCCAACTCAGGATACTTGATCTCG  
GCCTTAATGAAATTAACAACAAAACCTCAGCGCCAGGAATGGAGAGGTCTGAGAAAATATAT  
TTGAGATCTACCTATCCTATAACAATAACCTCCAACCTGTCTACCAGTTCTTTGCATTGG  
TCCCCAGCCTTCAAAGACTGATGCTCAGGAGGGTGGCCCTTAAAAATGTGGATATCTCCC  
CTTACCTTTCCGCCCTCTTCGTAACCTTGACCATTCTGGACTTAAGCAACAACAACATAG  
CCAACATAAATGAGGACTTGTGGAGGGTCTTGAAGAATCTAGAAAATCTGGATTTTCAGC  
ACAATAACTTAGCCAGGCTCTGAAAACGCGCAAACCCCGTGGTCCCGTTAATTTCTGTA  
AGGGGCTGTCTACCTCCACATCTTGAATTTAGAGTCCAACGGCTTAGATGAAATCCCAG  
TCGGGGTTTTCAAGAACTTATTGAACTAAAGAGCATCAATCTAGGACTGAATAACTTAA

ACAAACTTGAACCATTTCATTTTTGATGACCAGACATCTCTAAGGTCCTGAACTCCAGA  
 AGAACCTCATAACATCTGTTGAGAAGGATGTTTTCGGGCCGCTTTTCAAACCTGAAACA  
 GTTTTAGATATGCGCTTCAATCCGTTTCGACTGCACGTGTGAAAGTATTTCTGGTTTTGTTA  
 ACTGGATCAACCAGACCCACACTAATATCTCTGAGCTGTCCACTCACTACCTCTGTAACA  
 CTCCACATCATTATTATGGCTTCCCCCTGAAGCTTTTCGATACATCATCCTGTAAAGACA  
 GCGCCCCCTTTGAACTCCTCTTCATAATCAGCACCAGTATGCTCCTGGTTTTTATACTTG  
 TGGTACTGCTCATTACATCGAGGGCTGGAGGATCTCTTTTTACTGGAATGTTTCAGTGC  
 ATCGGATTCTTGGTTTTCAAGGAAATAGACACACAGGCTGAGCAGTTTGAATATACAGCCT  
 ACATAATTCATGCCATAAAGACAGAGACTGGGTCTGGGAACATTTCTCCCAATGGAAG  
 AACAAGACCAATCTCTCAAATTTTGCCTAGAAGAAAGGGACTTTGAAGCAGGCGTCCTTG  
 GACTTGAAGCAATTGTTAATAGCATCAAAAGAAGCCGAAAAATCATTTTCGTTATCACAC  
 ACCATTTATTAAGACCCCTCTGTGCAGAAGATTCAAGGTACATCACGCAGTTCAGCAAG  
 CTATTGAGCAAAATCTGGATTCAATTATACTGATTTTTTCTCCAGAATATTCCAGATTATA  
 AACTAAACCATGCACTCTGTTTGCGAAGAGGAATGTTTAAATCTCATTGCATCTTGAAC  
 GGCCAGTTCAGAAAAGACGGATAAATGCCTTTTCATCATAAATGCAAGTAGCACTTGGAT  
 CTCGGAATTCAGCACATTAACCTCATTGAAAGATTTGGAGTCGGTAAAGGGATAGATCCA  
 ATTTATAAAGGTCCATCATGAATCTAAGTTTTACTTGAAAGTTTTGTATATTTATTTATA  
 TGTATAGATGATGATATTACATCACAAATCCAATCTCAGTTTTGAAATATTTTCGGCTTATT  
 TCATTGACATCTGGTTTTACTCCTCAAATAAACACATGGGCAGTTAAAAACATCCTCTA  
 TTAATAGATTACCCATTAATCTTGAGGTGTATCACAGCTTTAAAGGGTTTTAAATATTT  
 TTATATAAATAAGACTGAGAGTTTTATAAATGTAATTTTTTAAACTCGAGTCTTACTGT  
 GTAGCTCAGAAAGGCTGGAAATTAATATATTAGAGAGTCATGTCTTGAACCTATTTATC  
 TCTGCCTCCCTCTGTCTCCAGAGTGTGCTTTTTAAGGGCATGTAGCACCACACCCAGCTA  
 TGTACGTGTGGGATTTTATAATGCTCATTTTTGAGACGTTTATAGAATAAAAAGATAATTG  
 CTTTTATGGTATAAGGCTACTTGAGGTAACAAGAATAAAAATTTTAGAAAAGAGGAGTTTT  
 GCTTTTTCAGTTGAAAAGTTTTGTATTTTTATTTTGGTGTGGTTTTGATAGCTGTTGAGT  
 AGGGTTTTAAACCTGCATACCCAGGAGCAGAATATCTTCTTAATCATCATAGTGTACAGG  
 ACCCCAGACCTAGCACAACTGACTCCATGATGGAAGTAACACCTAGGTCATAAATCTTAG  
 AACATAGACTGCATCGCCTGCTAAGATGAAAACAAAGACGTAATCATCAAAGTCTAAAGT  
 TCTGGGAAAGTCTCTAAATGTAATACTTGTCTTTTTGGCTTCTGTAGTTCTGCTTCTGG  
 CTGCTTTTTGTTAACTGAATTATGTCAATGCAGATTATGGTTTTTGTGTTGTTGTTGTTG  
 TTGTCTTGGTTTTTGTGCTCAAAGTTCGGTTGGGGCTACCTTAGGATCCCCAACAGCTAA  
 TATGGTCAACCACTGGCTATTAAGACTTTCTGTTAACATAAAACCCATGCCTGAGTAGTC  
 TTCTCTGAGAAGAGCCACAGTGATAGATGGCATTTTATTACTTGATAAAAATAGATATTGG  
 AATAAATACTTGTATTGTGCTAATTGTTGTGTCTCTTCTGCTGGAGAGTTAAATGACTTT  
 CTTACCCATATTATAGAAAGCCTTGCTTCCAGAACACTAGTCAATAAAGTGTCTTTGTGG  
 AAAACAGC

|         | Sequence                 | Tm |
|---------|--------------------------|----|
| Forward | CCTTCTCCTATCTCCCAAGCCTGA | 63 |
| Reverse | GAGCGAGGGGACAGACGC       | 60 |

#### TLR4

>NM\_021297 NM\_021297 Mus musculus toll-like receptor 4 (Tlr4), mRNA. 3/2007  
 CTGGTTGCAGAAAATGCCAGGATGATGCCTCCCTGGCTCCTGGCTAGGACTCTGATCATG  
 GCACTGTTCTTCTCCTGCCTGACACCAGGAAGCTTGAATCCCTGCATAGAGGTAGTTTCTT  
 AATATTACCTACCAATGCATGGATCAGAAAACCTCAGCAAAGTCCCTGATGACATTCTTTCT  
 TCAACCAAGAACATAGATCTGAGCTTCAACCCCTTGAAGATCTTAAAAAGCTATAGCTTC  
 TCCAATTTTTTCAAGACTTCAGTGGCTGGATTTATCCAGGTGTGAAATTGAAACAATTGAA  
 GACAAGGCATGGCATGGCTTACACCACCTCTCAAACCTTGATACTGACAGGAAACCCATC  
 CAGAGTTTTTCCCAGGAAGTTTCTCTGGACTAACAAGTTTAGAGAATCTGGTGGCTGTG  
 GAGACAAAATGGCCTCTCTAGAAAAGCTTCCCTATTGGACAGCTTATAACCTTAAAGAAA  
 CTCAATGTGGCTACAATTTTATACATTTCTGTAAGTTACCTGCATATTTTTTCCAATCTG  
 ACGAACCTAGTACATGTGGATCTTTCTTATAACTATATTCAAACCTATTACTGTCAACGAC  
 TTACAGTTTTCTACGTGAAAATCCACAAGTCAATCTCTCTTTAGACATGTCTTTGAACCCA  
 ATTGACTTCATTCAAGACCAAGCCTTTTCAAGGAATTAAGCTCCATGAACTGACTCTAAGA  
 GGTAATTTTAAATAGCTCAAATATAATGAAAACCTTGCCTTCAAACCTGGCTGGTTTTACAC  
 GTCCATCGGTTGATCTTGGGAGAATTTAAAGATGAAAGGAATCTGGAAATTTTTGAACCC  
 TCTATCATGGAAGGACTATGTGATGTGACCATTGATGAGTTCAGGTTAACATATACAAAT  
 GATTTTTTCAAGATGATATTGTTAAGTTCATTGCTTGGCGAATGTTTCTGCAATGTCTCTG

GCAGGTGTATCTATAAAAATATCTAGAAGATGTTCCCTAAACATTTCAAATGGCAATCCTTA  
TCAATCATTAGATGTCAACTTAAGCAGTTTTCCAACCTCTGGATCTACCCCTTTCTTAAAAGT  
TTGACTTTAACTATGAACAAAGGGTCTATCAGTTTTTAAAAAAGTGGCCCTACCAAGTCTC  
AGCTATCTAGATCTTAGTAGAAAATGCACTGAGCTTTAGTGGTTGCTGTTCTTATTCTGAT  
TTGGGAACAAAACAGCCTGAGACACTTAGACCTCAGCTTCAATGGTGCCATCATTATGAGT  
GCCAATTTTCATGGGTCTAGAAGAGCTGCAGCACCTGGATTTTTCAGCACTCTACTTTAAAA  
AGGGTCACAGAATTCTCAGCGTTCTTATCCCTTGAAAAGCTACTTTACCTTGACATCTCT  
TATACTAACACAAAATTGACTTCGATGGTATATTTCTTGGCTTGACCAGTCTCAACACA  
TTAAAAATGGCTGGCAATTTCTTCAAAGACAACACCCTTTCAAATGTCTTTGCAACACA  
ACAACTTGACATTCCTGGATCTTTCTAAATGTCAATTGGAACAAAATATCTTGGGGGGTA  
TTTTGACACCCTCCATAGACTTCAATTATTTAAATATGAGTCACAACAATCTATTGTTTTTG  
GATTCATCCCATTATAACCAGCTGTATTTCCCTCAGCACTCTTGATTGCAGTTTTCAATCGC  
ATAGAGACATCTAAAGGAATACTGCAACATTTTCCAAAAGAGTCTAGCCTTCTTCAATCTT  
ACTAACAAATCTGTTGCTTGTATATGTGAACATCAGAAAATTCCTGCAGTGGGTCAAGGAA  
CAGAAGCAGTTCTTGGTGAATGTTGAACAAAATGACATGTGCAACACCTGTAGAGATGAAT  
ACCTCCTTAGTGTGGATTTTAATAATTCTACCTGTTATATGTACAAGACAATCATCAGT  
GTGTCAGTGGTCAGTGTGATTGTGGTATCCACTGTAGCATTCTGATATAACCACTTCTAT  
TTTTACCTGATACTTATTGCTGGCTGTAAAAAGTACAGCAGAGGAGAAAAGCATCTATGAT  
GCATTTGTGATCTACTCGAGTCAGAATGAGGACTGGGTGAGAAAATGAGCTGGTAAAGAAT  
TTAGAAGAAGGAGTGCCTCGCTTTACCTCTGCCTTCACTACAGAGACTTTATTCTGGT  
GTAGCCATTGCTGCCAACATCATCCAGGAAGGCTTCCACAAGAGCCGGAAGGTTATTGTG  
GTAGTGTCTAGACACTTTATTAGAGCCGTTGGTGTATCTTTGAATATGAGATTGCTCAA  
ACATGGCAGTTTCTGAGCAGCCGCTCTGGCATCATCTTCATTGTCTTTGAGAAGGTTGAG  
AAGTCCCTGCTGAGGCAGCAGGTGGAATTGTATCGCCTTCTTAGCAGAAAACCTACCTG  
GAATGGGAGGACAATCCTCTGGGGAGGCACATCTTCTGGAGAAGACTTAAAAATGCCCTA  
TTGGATGGAAAAGCCTCGAATCCTGAGCAAAACAGCAGAGGAAGAACAAGAAAACGGCAACT  
TGGACCTGAGGAGAACAAAACCTCTGGGGCTAAACCCAGTCTGTTTGCAATTAATAAATG  
CTACAGCTCACCTGGGGCTCTGCTATGGACCGAGAGCCCATGGAACACATGGCTGCTAAG  
CTATAGCATGGACCTTACCGGGCAGAAGGAGTACTGACACTGACACCTTCTTTCCAGGGT  
ATGAATTACCTAACTCGGGAAAAGAAAACATAATCCAGAATCTTTACCTTTAATCTGAAGG  
AGAAGAGGCTAAGGCCTAGTGAGAACAGAAAAGGAGAACCAGTCTTCACTGGGCTTTTGA  
ATACAAGCCATGTCATGTTCTGTGTTTTCAGTTGCTTTTAGAAGAGTATTGATAGTTTTCAAC  
TGAACTGAACGGTTTCTTACTTTCCCTTTTTTCTACTGAATGCAATATTAATAAGCTCTT  
TTTTGAGAGGCTTTCATTCCAATTTTCATCTTCCATTTTATGTCATTTTCTTTTCTTTTTT  
TTTTTATCTAATTTCTATAAGAAATATGATTGATACACGCTCACAGATAGCCTGGCCAATC  
CTAAGAATGCTATATTTATTAATAACAATTCCTAGTATACTTTTACTTTTTATAAATTCAG  
TTATCGTTTTTTCATGCCTTGACTATAAACTAATATCATAAATAAGATTGTTACAGGTATG  
CTAAGAAGGCCCATATTTGACTATAATTTTTTAAGAAAGTATGTAATAATACTTTGTCA  
TATTGTCACTGAATGTCATTCTTAAGTTATTACCTAAGTTATGGATGTCACAGAGTCAGT  
GTTAAAAATAATTTGGTTGATAGAAAATTTTTAATCAGGAGGGAAAAGTGGAGAGGGGT  
GCAGGAACAGAAATCATGATTTTCATCATTATTCTTGTATTTTTCCGGAAGTTCACATAGC  
TGAATGACAAGACTACATATGCTGCAACTGATGTTCCCTTCTCATCAAGGATACTCTCTGA  
AGGACTTGAGAACATTTTGGGGAGGAAGAAAGGTCTAACATCCTTTTCTTTCATCATTCT  
CATTTCTGGACATGCCTTGTGAGATGGATGAATGTTGGGAGTACACATTTCTGCTTTTAC  
CTTATTTTCAGTCAGCATGAACACTGAATATATAATGTCATTTTCACAGTGTGTGTGTGTGT  
GTGTTGTGTATGTACATATATGAACCTGTACATGTGTTAAGTTTAAAGAGAAAATAGTG  
TACAGAGCAGCTCTATATTTGTGATAGGGCTTTAAATAGTTGAGCTAATTCAGAAAAGTA  
TGGAGATTTCTTGGTAAAGGAAACCAAAGTAGAATCATTACAAGATCTAACAATAAAAAAT  
TTTGAAA

|         | Sequence              | Tm |
|---------|-----------------------|----|
| Forward | TCACCTGGGGCTCTGCTATGG | 63 |
| Reverse | TTCTGCCCGGTAAGGTCCA   | 60 |

**OX40**

>NM\_011659 NM\_011659 Mus musculus tumor necrosis factor receptor  
superfamily, member 4 (Tnfrsf4), mRNA. 1/2007  
CCAAAGCACTTCTTAGCTTATCATGGGACTCTGCATACGCTGTGCCAAATACACAGGAA  
CACGTTACATACCTTCTTGCTGTCCGCTACTCTTCTTGCCCCACCTCCATAGTTCTT

ATAGCCACACCCTGCAAGGAAAAACCCAGACTCCTGTGAAGGCAGAAAGCAGACAAGGA  
 TGTATGTGTGGGTTTCAGCAGCCACAGCCCTTCTGCTGCTGGGACTCACACTTGGAGTTA  
 CAGCAAGGCGGCTCAACTGTGTTAAACATACCTACCCAGTGGTCACAAGTGCTGTCTGTC  
 AGTGCCAGCCAGGCCATGGTATGGTGAGCCGCTGTGATCATACCAGGGATACTCTATGTC  
 ATCCGTGTGAGACTGGCTTCTACAATGAAGCTGTCAATTATGATACCTGCAAGCAGTGTA  
 CACAGTGCAACCATCGAAGTGGAAGTGAAGTCAAGCAGAATTGCACACCTACTCAGGATA  
 CTGTCTGCAGATGTAGACCAGGCACCCAACCTCGGCAGGACAGCGGCTACAAGCTTGGAG  
 TTGACTGTGTTCCCTGCCCTCCTGGCCACTTTTTCTCCAGGCAACAACCAGGCCTGCAAGC  
 CCTGGACCAATTGTACCTTATCTGGAAAGCAGACCCGCCACCCAGCCAGTGACAGCTTGG  
 ACGCAGTCTGTGAGGACAGAAGCCTCCTGGCCACACTGCTCTGGGAGACCCAGCGCCCTA  
 CATTTCAGGCCAACCACTGTCCAATCCACCACAGTCTGGCCCAGGACTTCTGAGTTGCCCT  
 CTCCACCCACCTTGGTACTCCTGAGGGCCCTGCATTTGCTGTTCTCCTAGGCCTGGGCC  
 TGGGCCCTGCTGGCTCCCTTGACTGTCTGCTGGCCTTGTACCTGCTCCGGAAGGCTTGGA  
 GATTGCCTAACACTCCCAAACCTTGTGGGGAAAACAGCTTCAGGACCCCGATCCAGGAGG  
 AACACACAGACGCACACTTTACTCTGGCCAAGATCTGAGCATTACTACAGGAGTGGATTT  
 TATGGGGCACGGACAACCCATATCCTGATGCCCTGCCAGTACCCTCCACACCGTTCTAGGT  
 GCTGGGCTGGCTCTGGGCTTTTCTATGTATGCTATGCATACTACCTGCCTGGTGGTGCTC  
 CTAATAAACATGCTA

|         | Sequence               | Tm |
|---------|------------------------|----|
| Forward | TTGCCCTCTCCACCCACC     | 60 |
| Reverse | GGCCTAGGAGAACAGCAAATGC | 61 |

**OX40L**

>NM\_009452 NM\_009452 Mus musculus tumor necrosis factor (ligand) superfamily, member 4 (Tnfsf4), mRNA. 1/2007

AGATCTTGGAACGAGACGACCTGCTGGGACCTTTATCTTCTGACCCGCAGGCTTGACTTT  
 GCCCTTATTGGCTCCTTTGTGGTGAAGAGCAGTCTTCCCCCAGGTTCCCCGCCACAGCTG  
 TATCTCCTCTGCACCCGACTGCAGAGATGGAAGGGGAAGGGTTCAACCCCTGGATGAG  
 AATCTGGAAAACGGATCAAGGCCAAGATTCAAGTGAAGAAGACGCTAAGGCTGGTGGTC  
 TCTGGGATCAAGGGAGCAGGGATGCTTCTGTGCTTCATCTATGTCTGCCTGCAACTCTCT  
 TCCTCTCCGGCAAAGGACCCTCCAATCCAAAGACTCAGAGGAGCAGTTACCAGATGTGAG  
 GATGGGCAACTATTATCATCAGCTCATAACAAGAATGAGTATCAAACCTATGGAGGTGCAGAAC  
 AATTTCGGTTGTCTCAAGTGTGATGGGCTTTATATCATCTACCTGAAGGGCTCCTTTTTTC  
 CAGGAGGTCAAGATTGACCTTCATTTCCGGGAGGATCATAATCCCATCTCTATTCCAATG  
 CTGAACGATGGTTCGAAGGATTGTCTTCACTGTGGTGGCCTCTTTGGCTTTCAAAGATAAA  
 GTTTACCTGACTGTAAATGCTCCTGATACTCTCTGCGAACACCTCCAGATAAATGATGGG  
 GAGCTGATTGTTGTCCAGCTAACGCCTGGATACTGTGCTCCTGAAGGATCTTACCACAGC  
 ACTGTGAACCAAGTACCCTGTGAATTCCACTCTGAGGGTGGACGGGACACAGGTTCTTT  
 CTCGAGAGAGATGAGTGCATCCTGCTCATGAGATGTGACTGAATGCAGAGCCTACCCTAC  
 TTCCTCACTCAGGGATATTTAAATCATGTCTTACATAACAGTTGACCTCTCATTCCCAGG  
 ATTGCCTTGAGCCTGCTAAGAGCTGTTCTGGGAATGAAAAAAAAAATAAATGTCTCTTCAA  
 GACACATTGCTTCTGTCTGGTTCAGAAGCTCATCGTAATAAACATCTGCCACTGAAAATGGC  
 GCTTGATTGCTATCTTCTAGAAATTTGATGTTGTCAAAAAGAAAAGCAAAACATGGAAAAGG  
 TGGTGTCCACCAGCCAGTAGGAGCTGGAGTGTCTCTCCAGGTTAAGGTGATAGAAGTTT  
 ACATGTTGCCTAAAACCTGTCTCTCATCTCATGGGGGGCTTGGAAAAGAAGATTACCCCGTG  
 GAAAGCAGGACTTGAAGATGACTGTTAAGCAACAAGGTGCACTCTTTTCTGGCCCTTG  
 AATACACATAAAAAGACAACCTTCTTCAAAGAACTACCTAGGGACTATGATACCCACAAA  
 GAACCACGTCAGCGATGCAAAGAAAACCAGGAGAGCTTTGTTTATTTTGCAGAGTATACG  
 AGAGATTTTTTACCCTGAGGGCTATTTTTTATTATACAGAATGATAGTGAAGTGGATGTCTC  
 AGGATAAAGGCCAAGAAGGATTTTTTACAGTCTGAGCAAGACTGTTTTTGTAGGTTTCTC  
 TCTCCAAAACCTTTTAGGTAATTTTTGATAATTTTTAAATTTTTATATTTTTGGACCATT  
 TTCAATAGAAGATTGAAACATTTCCAGATGGTTTCATATCCCCACAAGAGCAGGTCTGCTC  
 CGTTCCAAGATCT

|         | Sequence             | Tm |
|---------|----------------------|----|
| Forward | CCCCGTGGAAAGCAGGAC   | 60 |
| Reverse | GGCCAGGAAAAGAGTGCACC | 61 |

TL1A (Tnfsf15)

>NM\_177371 NM\_177371 Mus musculus tumor necrosis factor (ligand) superfamily, member 15 (Tnfsf15), mRNA. 11/2006

TTAATGGGGGGCTCTCTGGTCAGAAGGGATCAGAAGTCTCTCCAAGACAGCAGAAGGATG  
GCAGAGGAGCTGGGGTTGGGCTTCGGAGAAGGAGTCCCAGTGGAAGTGCTGCCGGAAGGC  
TGTAGACACAGGCCAGAGGCCAGGGCCGGGCTAGCTGCCAGGAGCAAAGCCTGCCTGGCT  
CTCACCTGCTGCCTGTTGTCAATTTCCCATCCTCGCAGGACTTAGCACCCCTCCTAATGGCT  
GGCCAGCTCCGGGTCCCCGAAAAGACTGTATGCTTTCGGGCCATAACAGAAGAGAGATCT  
GAGCCTTACCACAGCAAGTTTACTCACCTCCCAGAGGCAAGCCGAGAGCACACCTGACA  
ATTAAGAAAACAAACCCAGCACCACATCTGAAAAATCAGCTCTCTGCTCTACACTGGGAA  
CATGACCTAGGGATGGCCTTACCAAGAACGGGATGAAGTACATCAACAAATCCCTGGTG  
ATCCCAGAGTCAGGAGACTATTTTCATCTACTCCCAGATCACATTCGAGGGACCACATCT  
GTGTGTGGTGACATCAGTTCGGGGGAGACGACCAAAACAAGCCAGACTCCATCACCATGGTT  
ATCACCAAGGTAGCAGACAGCTACCCTGAGCCTGCCCGCTACTAACAGGGTCCAAGTCT  
GTGTGTGAAAATAAGCAACAACCTGGTTCCAGTCCCTCTACCTTGGGGCCACGTTCTCCTTG  
GAAGAAGGAGACAGACTAATGGTAAACGTCAGTGACATCTCCTTGGTGGATTACACAAAA  
GAAGATAAAACTTTCTTTGGAGCTTTCTTGCTATAAGGAGGAGAAAACCATCATTCCAAG  
GGGCTCCCCTGCCTCCTACTTTCCAATTTCTTTTCTCATATGGATCTATAAACAGGGGC  
TTTAGAGGGATCAGGGAAGGGGACAGTGGTTTTAGCTATATAATTTAGGAACCCAATATTG  
ATCCGTATATGCCTTATGGACTAAAATAGTAAATGGAAAACCCAGTACAGCTCATGTTTG  
ATAGAGACCTGCTGGGTTTTTAAAAATTGAAACACGCCTCATCCAATGGCACAATCTACTG  
ATTTTCAGGACAGAACCTTTCCACAGTGCCTCTGTCCAAGTCCCTTCTGAATTCAGCAGT  
TCAGTTAGAGCTGAATTCGACAATGAACTTACTCCAGATCAAGAGCTAAAGACAGAATCC  
AAAGAAAAGACTGAGAAAATGATGTTATTTCTCCAAGAGGCAATGCATTTCCACATTTCTTT  
TGTGCCTAACCTAAAAAATAAGAAAAGAAAAGGAAGGAAGGAAGGAAGGAAGGAAGGA  
GGAAGGAAGGAAGGAAGGAAGGAAGGAAGGAAGGAAGGAAGGAAGGAAGGAAGGAAGGA  
CAAGAAAAAGAAAAAATGGTATTTCTCGTGAATATTTCCCTAAAAGGAATTGGTTTTCTG  
CTGTGAAGGAGAAAACCTCACCTTTCTTCTGATTGCATCCTTTAGTATCCAAACATACAAG  
TGGAATTTCAAATGCACATGGAACATAGAACACTTTTATTATTGTGAGAACATGTTTTAT  
TGACTACCTACTATGCTCTGGGCACCTCAGCCACAGGACCATGAAGAGAAAAGTCAAATTT  
TCTTAAAAACTAAATGAATCCTCAATACATACTTCTGATCAACTACCACTCAAAAATGTA  
TAACTTCCAAAGTATAACTTCAAGTCAGCCATCTAGGTGGTTTTCTTGGGTAAAGGTGCTT  
GTCATTAAGCCTGACACCTGGGTTTGACCTCCCAGAACCCAAAAGCTGGAAGGAGAGAAT  
TGGTTCCCACAAATTATCCTCAAACCCCCATACAAATGATGTGGCATGCACACATGTAAC  
TAAATAAATAAGTGTAACAAAAACAAAAACAAAAATTTTAAAGAAAAATTTCAAGTCTT  
GAAAGACAGCATTCTGAGAATGTTGTCTCCATCGTTGTCCAGTATAGGCTAACCAGCTG  
ATAGAGACACTGAAGGAATTTAAAGACAGACATCAAGTGAATGGAGCACTGTAGAAACA  
CTTGATTCATGCCAGGAGTCAATGTACTATGAAGACCAACAACAAGTGTGAGTCAATCAA  
ATCCAGAGGTGTTTTATCTAGATCTGCTTTCAAGTTTTGGTTTTGCAGCCTTTATATAGTCTC  
TATTACAAATGCTCGTGTGATGGTAGATGCCACAAGGAGTCAGGGGGTAAACTTAGCCCC  
AAACCACTGCTGAGCCATCTTCTAGGAAACCTTTCGAAGCAGAGCTGGGCAGCGTGACTCC  
CACACAATGACTGGGAAAAGTAGTAGCTGATCAAAAATTTGTTGAGTAATAATTTGTTAGAA  
AATTCATCTCCACTGCCTACTAAACCTAAGTTGTATACTATCTAGCTTCTGCTAAGCCAA  
CTTACATTTGGCCACTTTTTCTGTCTTCAACTTCTTGAAGTATCACAGGTCTCAGTGAGAA  
CACAGGGAAAGGTGAGGTGCCTTCCCCTGGTTCTTCATAGGGGAAACCACACCTGAAAG  
AAGATGAGCAGCCTGAGGTGACCTGGAGGAAGGGCTGTCTCAGAAGAAGGACTTATTTTTT  
TGGCTTAGGTCTAAAACCTTGAGAGTAATGCTCACTGGTCAATTGAGGATGCTTTATCAA  
TGACTCCAGTCTGACTCCAAGGTCAGAAAGGAGAGTGAGATGCTCTCTCTGCCTGCATAT  
ATCTTTCATGGAACATGAGAATATTGAGCAACATAGACTTATAGGAAAAACTTGCCCAAA  
AGTAGCCAGAGTAACCTGGTCATCCCCCTCTACTAAACCCAAAGCTTTGTGTCAAGGGCCTT  
CAAAGCTGCCCAGAAGTGATCTGGATGGCTTGGGAATTTATCCAAGACAGGAATTTCTCTG  
ACAGCCAAAAGATGCTTGAGTCTTGTGCCTGCATGCATTTATTTTTGCCCTGTTTATTG  
AAGACTGTAACCTGTTGATTTGTGGGTATACATACATACATACATACATACATACATACAT  
ACATACATATGCTGTGATGAAGGCAGCATCAAACATTAATAATTGGACTCAAACCAGCAT  
TTCTGTTTTCAAGATACTAAGTATTTCCCATGCAAACAGGAGCATGCTATTTTTCTAAAGC  
AAAATGAAAAAATAGTTTTTGAAGTATATATATGATGGAGTCAAGTGTAATGGCATAACA  
TCTGTAAACCCAGCACATGGGATGCTGAGCCAGGAGGATCGCCGTGAGTTTGAGGAGAAC  
AGGGGCTAAATAGTAATTTTCAGGAAAGCCTTGCCTATATAACAAGACCTTGTCTCAAAT  
GAAAAAAAAAAAAAAAAAAAA

|         | Sequence              | Tm |
|---------|-----------------------|----|
| Forward | CGACCAAACAAGCCAGACTCC | 61 |
| Reverse | CGGGCAGGCTCAGGGTAG    | 60 |

#### CXCR4

>NM\_009911 NM\_009911 Mus musculus chemokine (C-X-C motif) receptor 4 (Cxcr4), mRNA. 2/2007

AATTTTGTTCCTGGTGCAGCAGGTAGCAGTGAAACCTCTGAGGCGTTTGGTGCTCCGGT  
AACCACCACGGCTGTAGAGCGAGTGTTCGCCATGGAACCGATCAGTGTGAGTATATACACT  
TCTGATAACTACTCTGAAGAAGTGGGTTCTGGAGACTATGACTCCAACAAGGAACCCCTGC  
TTCCGGGATGAAAACGTCCATTTCAATAGGATCTTCTGCCCACCATCTACTTCATCATC  
TTCTTGACTGGCATAGTCGGCAATGGATTGGTGATCCTGGTCATGGGTTACCAGAAGAAG  
CTAAGGAGCATGACGGACAAGTACCGGCTGCACCTGTCAGTGGCTGACCTCCTCTTTGTC  
ATCACACTCCCCTTCTGGGCAGTTGATGCCATGGCTGACTGGTACTTTGGGAAATTTTTG  
TGTAAGCTGTCCATATCATCTACACTGTCAACCTCTACAGCAGCGTTCTCATCCTGGCC  
TTCATCAGCCTGGACCGGTACCTCGCTATTGTCCACGCCACCAACAGTCAGAGGCCAAGG  
AAACTGCTGGCTGAAAAGGCAGTCTATGTGGGCGTCTGGATCCCAGCCCTCCTCCTGACT  
ATACCTGACTTCATCTTTGCCGACGTGAGCCAGGGGGACATCAGTCAGGGGGATGACAGG  
TACATCTGTGACCGCCTTTACCCCCGATAGCCTGTGGATGGTGGTGTTCATTCCAGCAT  
ATAATGGTGGGTCTCGTCCTGCCCGGCATCGTCATCCTCTCCTGTTACTGCATCATCATC  
TCTAAGCTGTACACTCCAAGGGCCACCAGAAGCGCAAGGCCCTCAAGACGACAGTCATC  
CTCATCCTAGCTTTCTTTGCCTGCTGGCTGCCATATTATGTGGGGATCAGCATCGACTCC  
TTCATCCTTTTGGGGGTCAAGCAAGGATGTGACTTCGAGAGCATCGTGCACAAGTGG  
ATCTCCATCACAGAGGCCCTCGCCTTCTTCCACTGTTGCTGAACCCCATCCTCTATGCC  
TTCCTCGGGGCCAAGTTCAAAGCTCTGCCAGCATGCACTCAACTCCATGAGCAGAGGC  
TCCAGCCTCAAGATCCTTTCCAAAGGAAAGCGGGGTGGACACTCTTCCGTCTCCACGGAG  
TCAGAATCCTCCAGTTTTCACTCCAGCTAACACTTATGCAAAGACATATATAATATATAT  
ATATATATATATGATAAAGAAGCTTTTTTATGTTACACATTTTCCAGATATAAGAGACTGA  
CCAGTCTTGTACAGTTTTTTTTTTTTTATTGACTGTTGGGAGTTTATGTTTCTCTAGTTTT  
TGTGAGGTTTTGACTTAATTTATATAAATACTTTTTTTTTGTTTTGTTTTGTTTCATGTGAATG  
AGTGTCTAGGCAGGACCTGTGGCCAAGTTCCTTAGTAGCTGTTTATCTGTGTGTAGGACTG  
TAGAAGCTGATAGGAAGAAACTGAACATTCCAGAATGTGTGGTAAATTGAATAAAGCTAG  
CCGTGATCCTCAGTGTGCTGCATAATCTCTTCATTCCGAGGAGCACCCCAACCCCAACC  
CCCAACCCCAACCCATCTTAAATTGTTTTGGTTATGCTGTGTGATGGTTTTGTTTTGTTTT  
TTTTTTTTGTTGTTTTGTTTTGTTTTGTTTTTTTTCTGTAAAAGATGGCACTTAAAACCAAAGC  
CTGAAATGGTGGTAGAAATGCTGGGGGTTTTTTTTGTTTTGTTTTGTTTTTTCAGTTTTCAAG  
AGTAGATTGATTTCACTCCCTACAAATGTACAGTCTTGTATTACATTGTTAATAAAAAGTC  
AATGATAAACTTAAAAA

|         | Sequence               | Tm |
|---------|------------------------|----|
| Forward | TCCTCTATGCCTTCCTCGGG   | 60 |
| Reverse | CATGGAGTTGAGTGCATGCTGG | 62 |

#### CXCL13

>NM\_018866 NM\_018866 Mus musculus chemokine (C-X-C motif) ligand 13 (Cxcl13), mRNA. 12/2006

GAGCTAAAGGTTGAACTCCACCTCCAGGCAGAATGAGGCTCAGCACAGCAACGCTGCTTC  
TCCTCCTGGCCAGCTGCCTCTCTCCAGGCCACGGTATTCTGGAAGCCCATTACACAAACT  
TAAAATGTAGGTGTTCTGGAGTGATTTCAACTGTTGTGGTCTAAACATCATAGATCGGA  
TTCAAGTTACGCCCCCTGGGAATGGCTGCCCAAACTGAAGTTGTGATCTGGACCAAGA  
TGAAGAAAGTTATATGTGTGAATCCTCGTGCCAAATGGTTACAAAGATTATTAAGACATG  
TCCAAAGCAAAAGTCTGTCTTCAACTCCCCAAGCTCCAGTGAGTAAGAGAAGAGCTGCCT  
GAAGCCACTATCATCTCAAAGACACACCTGCACCTTTTTTTTTTATCCCTGCTCTGAATT  
TTAGATATGTTCTTAGTTAAAGAATTTCCAAGAAAATAACTCCCCTCTACAAACAAACAT  
GACTGTAGGTAATAACAAAGCAAAAACAAACAAGCAAAACAAACAAACTAAAAAAAACCCAA  
TCCTGCAGGAGCTGAGAGGGAATGCTCAAGCTCCGTTGCATACCCAACCCACATCCTTGT  
TCCTTAAGAAAGGCTATTTGAGAACAGGCATTTAGTGACAACCCACTTCAGATGCATGTG  
GTAATAGATCTGTTGTTAATGTTAAACTATCCTAGATTGTTCGAGGAATGAAAAACCTAC

ATGTCAAATGTGAACTTGTAGCTCGTACTAACAAGAGGTTTGGGAGATGGACTTCAGTTA  
TTTTGCACCCTTGTAAAACGCAGGCTTCCAAAATAGTCTCCAGAAGGTTCTGGGAAGCT  
GGTGCAATGCCATCATGAGGTGGTGCAAAGCAGGTCTCCTTTAGAGAAAAGCTTCTGGG  
GGAAACAGTCCACTTTGAAAGGTTGCTTGTATAAGATTTATTGTCTTGCATTAAAACCA  
GTAACAATTGAAAGATCCTCAGCTTAAAGGTCCAGGCTCTTCAGCAGTATACAAATATAT  
TCCTTTGCACTGTGACCCTGATGATCTATTTTTATTATTTCATATCTTTTCACACAGACAAA  
ATACCAGCCTCTTGTATCAGATTTCTTAATGTTTTCTATTTCATCTGGTGTCAATCAATAA  
ATGTAATCAAATGTTTTGCTTA

|         | Sequence                 | Tm |
|---------|--------------------------|----|
| Forward | CATCATGAGGTGGTGCAAAGC    | 60 |
| Reverse | AAGTAGGACTGTTTTCCCCCAGGA | 61 |

CD91

>NM\_008512 NM\_008512 Mus musculus low density lipoprotein receptor-related protein 1 (Lrp1), mRNA. 2/2007

AGTCAGGGGAGCAGCGGTGCGAGCTCCAGGCCAGTGCAGTGCAGGAGGCGGAAACGGGGGA  
GCCCCCTAGTGCTCCATCAGGCCCTACCAAGGCACCCCCATCGGGTCCACGCCCCCACC  
CCCCACCCCGCTCCTCCCAATTGTGCATTTTTGCAGCCAGAGGCGGCTCCGAGATGGGG  
CTGTGAGCTTCGCCCTGGGAGGGGGAGAGGAGCGAGGAGTAAAGCAGGGGTGAAGGGTTC  
GAATTTGGGGGCAGGGGGCGCACCCGCGTCAGCAGGCCCTTCCAGGGGGCTCGGAACTG  
TACCATTTACCTATGCCCTGGTTTCGCTTTGCTTAAAGGAAAGGATAAGAATAGAAGAGT  
CGGGGAGAGGAAGATAAAGGGGGACCCCCAATTGGGGGGGGCGAGGACAAGAAGTAACA  
GGACCAGAGGGTGGGGGCTGCTGTTTGCATCGGCCACACCATGCTGACCCCGCGTTGC  
TGCTGCTGCTGCCGCTGCTTTCAGCTCTGGTCTCCGGGGCCACTATGGATGCCCTAAAA  
CTTGCAGCCCTAAGCAGTTTGCCTGCAGAGACCAAATCACCTGTATCTCAAAGGGCTGGC  
GGTGTGACGGTGAAAGAGATTGCCCGACGGCTCTGATGAAGCCCTGAGATCTGTCCAC  
AGAGTAAAGCCCAGAGATGCCCGCCAAATGAGCACAGTTGTCTGGGGACTGAGCTATGTG  
TCCCCATGTCTCGTCTCTGCAACGGGATCCAGGACTGCATGGATGGCTCAGACGAGGGTG  
CTCACTGCCGAGAGCTCCGAGCCAACCTGTTCTCGAATGGGTTGTCAACACCATTGTGTAC  
CTACACCCAGTGGGCCACGTGCTACTGTAACAGCAGCTTCCAGCTGCAGGCAGATGGCA  
AGACGTGCAAAGATTTTGACGAGTGTTCGTTGATGGCACCTGCAGCCAGCTTTGCACCA  
ACACAGATGGCTCCTTCACATGTGGCTGTGTTGAAGGCTACCTGCTGCAACCCGGACAACC  
GCTCCTGCAAGCCAAAGAATGAGCCAGTAGATCGGCCCGCAGTGTACTACTGATTGCCAAT  
CTCAGAACATCCTAGCTACGTACCTGAGTGGGGCCCAAGTGTCTACCATCACACCCACCA  
GCACCCGACAAAACCACGGCCATGGACTTCAGTTATGCCAATGAGACCGTATGCTGGGTGC  
ACGTTGGGGACAGTGTGCTGCCAGACACAGCTCAAGTGTGCCCGGATGCCTGGCCTGAAGG  
GCTTTGTGGATGAGCATACCATCAACATCTCCCTCAGCCTGCACCACGTGGAGCAGATGG  
CAATCGACTGGCTGACGGGAAACTTCTACTTTGTGCGACGACATTGACGACAGGATCTTTG  
TCTGTAACCGAAACGGGGACACCTGTGTCACTCTGCTGGACCTGGAACCTTACAACCCCA  
AAGGCATCGCCTTGGACCCCGCCATGGGGAAGGTGTTCTTCACTGACTACGGGCAGATCC  
CAAAGGTGGAGCGCTGTGACATGGATGGACAGAACCACCAAGCTGGTGGATAGCAAGA  
TCGTGTTTCCACACGGCATCACCTGGACCTGGTCAGCCGCTCGTCTACTGGGCGGACG  
CCTACCTAGACTACATCGAGGTGGTAGACTACGAAGGGAAGGGTCGGCAGACCATCATCC  
AAGGCATCCTGATCGAGCACCTGTACGGCCTGACCGTGTGAGAACTATCTCTACGCCA  
CCAACCTCGGACAATGCCAACACGCAGCAGAAGACGAGCGTGATCCGAGTGAACCGGTTCA  
ACAGTACTGAGTACCAGGTGCTCACCCGTGTGGACAAGGGTGGTGCCTGCATATCTACC  
ACCAGCGACGCCAGCCCCGAGTGGCGAGTACGCCTGTGAGAATGACCAGTACGGGAAGC  
CAGGTGGCTGCTCCGACATCTGCCTCCTGGCCAACAGTCAAGGCAAGGACCTGCAGGT  
GCAGGTCTGGCTTACGCTGGGAAGTGTGAGGAACTTTGTAAGAAACCTGAACATGAGC  
TGTTCCCTCGTGTATGGCAAGGGCCGACCAGGCATCATTAGAGGCATGGACATGGGGCCA  
AGTCCCAGATGAGCAGATGATCCCCATCGAGAACCTTATGAATCCACGCGCTCTGGACT  
TCCACCGGAGACCGGCTTTCATCTACTTTGCTGACACCACAGCTACCTCATTGGCCGCC  
AGAAAAATTGATGGCACGGAGAGAGACTATCCTGAAGGATGGCATCCACAATGTGGAGG  
GCGTAGCCGTGGACTGGATGGGAGACAATCTTTACTGGACTGATGATGGCCCCAAGAAGA  
CCATTAGTGTGGCCAGGCTGGAGAAAAGCCGCTCAGACCCGGAAGACTCTAATTGAGGGCA  
AGATGACACACCCAGGGCCATTGTAGTGGATCCACTCAATGGGTGGATGTACTGGACAG  
ACTGGGAGGAGGCCCAAGGACAGTCGGCGAGGGCGGCTCGAGAG

|  | Sequence | Tm |
|--|----------|----|
|--|----------|----|

|         |                     |    |
|---------|---------------------|----|
| Forward | ATCTCAAAGGGCTGGCGGT | 61 |
| Reverse | GCTTCATCAGAGCCGTCGG | 60 |

APRIL (Tnfsf13)

>NM\_023517 NM\_023517 Mus musculus tumor necrosis factor (ligand) superfamily, member 13 (Tnfsf13), mRNA. 1/2007

GAAGGCTGGCCGCTCCTTCTGGGTGTCACGGCTGCCCTGTCCTTCTTAGATAATGGCACC  
AAATTCTCCTGAGGCTAGGGGGGAAGGAGTGTGAGAGTGTCACTAGCTCGACCCTGGGGGA  
CAAGGGGGACTAATAGTACCCTAGCTTGATTTCTTCCCTATTCTCAAGTTCCCTTTTTATTT  
CTCCCTTGCGTAACCCGCTCTTCCCTTCTGTGCTTTGCTGTATTCCCACCCTCCCTGC  
TACCTCTTGGCCACCTCACTTCTGAGACCACAGCTGTTGGCAGGGTCCCTAGCTCATGCC  
AGCCTCATCTCCAGGCCACATGGGGGGCTCAGTCAGAGAGCCAGCCCTTTTCGGTTGCTCT  
TTGGTTGAGTTGGGGGGCAGTTCTGGGGGCTGTGACTTGTGCTGTGCGACTACTGATCCA  
ACAGACAGAGCTGCAAAGCCTAAGCGGGGAGGTGAGCCGGCTGCAGCGGAGTGGAGGGCC  
TTCCCAGAAGCAGGGAGAGCGCCCATGGCAGAGCCCTCTGGGAGCAGAGTCTTGATGTCTT  
GGAAGCCTGGAAGGATGGGGCGAAATCTCGGAGAAGGAGAGCAGTACTCACCCAGAAGCA  
CAAGAAGAAGCACTCAGTCTGCATCTTGTTCAGTTAACATTACCTCCAAGGCAGACTC  
TGACGTGACAGAGGTGATGTGGCAACCAGTACTTAGGCGTGGGAGAGGCCTGGAGGCCCA  
GGGAGACATTGTACGAGTCTGGGACACTGGAATTTATCTGCTCTATAGTCAGGTCTGT  
TCATGATGTGACTTTCACAATGGGTGAGGTGGTATCTCGGGAAGGACAAGGGAGAAGAGA  
AACTCTATTCCGATGTATCAGAAGTATGCCTTCTGATCCTGACCGTGCCTACAATAGCTG  
CTACAGTGCAGGTGTCTTTTCAATTTACATCAAGGGGATATTATCACTGTCAAAATTCACG  
GGCAAACGCAAACTTAGCCTTTCTCCGCATGGAACATTCTGGGGTTTGTGAAACTATG  
ATTGTTATAAAGGGGGTGGGGATTTCCCATTCCAAAACTGGCTAGACAAAGGACAAGGA  
ACGGTCAAGAACAGCTCTCCATGGCTTTGCCTTGACTGTTGTTCCCTTTGCCTTTCC  
CGCTCCCCTATCTGGGCTTTGACTCCATGGATATTAATAAAGTAGAATATTTTGTGTTT  
ATCTCCCACACAGCCCCAAATTTCTTTTGTGTTGTGTCGAAGGGGGTTTTCGCGACTGTG  
CCAAGCCTTGTCCACTGGAATGCATCCAGAACAGCAGCACCATCTAGCGGCAGGTTGAGG  
AAAGACTATGGTCTCTGCTAGGGAAAACCTTATCCAACCTTTCAAGTACCCTCTGCTTCA  
ATTAACAAGAAGCCCGCTTTTCACTATTTACCTATTGCGTCCAAATTTCTTGTACTATC  
TAGAAAAAGATATATGTTAGGTGCCTCGATATGCATGCCATTTCATCCTCCCATTCTCCT  
ATACACTTCCGAGCTGGGCACTGAGCTTTACGCCTTAAATCACAGTACTCGGGAGGCAGA  
TCTCGATGAGTTTCGAGGCCAAGTGGTCTAAATAGTGTGAGTTCCAGGCCACCCAGGGTTA  
CAATGGTGAGACCCTGTCTCAAACAAACTAACAAACAAATAAACGAAAGGCTCTCCACG

|         | Sequence                     | Tm |
|---------|------------------------------|----|
| Forward | GCATCCAGAACAGCAGCACC         | 60 |
| Reverse | TTTTCCCTAGCAGAGACCATAGTCTTTC | 61 |

DR3 (Tnfrsf25)

>NM\_033042 NM\_033042 Mus musculus tumor necrosis factor receptor superfamily, member 25 (Tnfrsf25), mRNA. 11/2006

CTGCGTGGAGGGGAAATGGGCCAGAGGCTGCTGGCAGGGGGCCTCCTCTGCTGTACACAA  
GCTGGTTTTGTAGACAGTGAGAGGGAAGCTGATCCCAGTCCCCTAACCTGTTCTGCCCA  
GGAGCCTGAGAACTGAGCTTACTCGGGCAAATGCTAGGGCTTCAGAAATGGAGGAGCTGC  
CTAGGAGGGAGAGGTCACCTCCTGGGGCAGCCACACCAGGGTCAACTGCACGTGTTCTCC  
AGCCTCTGTTCTTACCCTGCTGCTGCTGCTGCTGCTGCTGCTGCTTGGTGGCCAGGGCCAGG  
GCGGCATGTCTGGCAGGTGTGACTGTGCCAGTGTGAGTCCCAGAAGAGGTATGGCCCGTTT  
GTTGCAGGGGGCTGCCCAAAGGGGACACTACATGAAGGCCCCCTGCGCAGAACCCTGTGGCA  
ACTCCACCTGCCTTCCCTGTCCCTCGGACACCTTCTTGACCAGAGACAACCACTTTAAGA  
CTGACTGTACCCGCTGCCAAGTCTGTGATGAAGAGGCCCTTCAAGTGACCCTTGAGAACT  
GCTCGGCAAAGTCCGACACCCACTGTGGCTGCCAGTCAGGCTGGTGTGTTGACTGCTCCA  
CCGAGCCATGTGGGAAAAGCTCACCTTTCTTGTGTCCCATGCGGGGCTACAACACCAG  
TCCATGAGGCTCCAACCCCTGTTTTGGGTCCAGGTGCTTCTAGGAGTCCGCTTCCCTTT  
TTGGGGCTATCCTGATCTGTGCATATTGTGCATGGCAGCCTTGTAAGGCCGTGGTCACTG  
CAGACACAGTCTGGGACGGAGACCCTGCCCTCACCACAGACTGCCCATCTCTCAGCCTCAG  
ACAGCGCCACACCTCCTGGCACCTCCAAGCAGTACTGGGAAAATCTGTACCCTGTCC  
AGTTGGTAGGCAACAACTGGACCCCTGGCTTATCCCAGACTCAGGAGGTGGTCTGCGGAC  
AGGCCTCACAAACCCTGGGATCAGCTGCCAAACAGAACTCTTGGAACCTCTGCGCATCTC



CGCTCTCGCCAGCGCCCCCTGCGGGCTCTCCGGCTGCTGTGCTCCAGCCTGGCCCGCAGC  
TCTACGATGTGATGGATGCGGTCCCAGCACGAAGGTGGAAGGAGTTCGTGCGCACGCTGG  
GGCTGCGGGGAAGCGGAAATTGAAGCCGTGGAGGTGGAATCTGCCGCTTCCGAGACCAGC  
AGTATGAGATGCTCAAGCGCTGGCGTCAGCAGCAGCCTGCAGGCCTCGGTGCCATCTATG  
CGGCTCTGGAGCGCATGGGTCTGGAAGGCTGTGCCGAGGACCTGCGCAGCCGCTGCAGC  
GTGGCCCGTGATGGAAGGTCCATCAGCCACTTTGACACCCTAGTGACCCTTGAAGGAGCC  
TTAAGTATTGTTACTTATGCGTGTAGACATTTTATGTCAATTACTAACCCCTGCCGTGG  
TCCTGCGTAGCAGGGCTGGCTGCCTCACTTTTGTCTTATCTGCAGCACGGAGCTCCTGCTA  
AGGAAGCGTCATGGAGAAATACCAGAAGGGGCCAAGTGATTGGTTGCTCAGCTGTTAAT  
TAGCCCCGAGTTTGGACTTGGTATTTAAATTTTCGTAAGAAAAGCAAAAAAAAAAAAAAAAAA

|         | Sequence                | Tm |
|---------|-------------------------|----|
| Forward | CACACCCTCCTGGCACCTC     | 60 |
| Reverse | TGTTGCCTACCAACTGGACAGTG | 61 |

### RANKL

>NM\_011613 NM\_011613 Mus musculus tumor necrosis factor (ligand)  
superfamily, member 11 (Tnfsf11), mRNA. 2/2007

GCCATCTCTCCCACGTCCCGGGGAGCCACTGCCAGGACCTCTGTGAACCGGTGCGGGCGG  
GGGCCGCTGGCCGGGAGTCTGCTCGGCGGTGGGTGGCCGAGGAAGGGAGAGAACGATCG  
CGGAGCAGGGCGCCGAACTCCGGGCGCCGCGCCATGCGCCGGGCCAGCCGAGACTACGG  
CAAGTACCTGCGCAGCTCGGAGGAGATGGGCAGCGGCCCGCGCTCCACACGAGGGTCC  
GCTGCACCCCGCGCCTTCTGCACCGGCTCCGGCGCCGCCACCCGCGCCTCCCGCTCCAT  
GTTCTGGCCCTCCTGGGGCTGGGACTGGGCCAGGTGGTCTGCAGCATCGCTCTGTTCTT  
GTACTTTTCGAGCGCAGATGGATCCTAACAGAATATCAGAAGACAGCACTCACTGCTTTTA  
TAGAATCCTGAGACTCCATGAAAACGCAGATTTGCAAGACTCGACTCTGGAGAGTGAAGA  
CACACTACCTGACTCCTGCAGGAGGATGAAAACAAGCCTTTCAGGGGGCCGTGCAGAAGGA  
ACTGCAACACATTGTGGGGCCACAGCGCTTCTCAGGAGCTCCAGCTATGATGGAAGGCTC  
ATGGTTGGATGTGGCCAGCGAGGCAAGCCTGAGGCCAGCCATTTGCACACCTCACCAT  
CAATGCTGCCAGCATCCCATCGGGTTCCTATAAAGTCACTCTGTCTCTTGGTACCACGA  
TCGAGGCTGGGCCAAGATCTCTAACATGACGTTAAGCAACGGAAAACTAAGGGTTAACCA  
AGATGGCTTCTATTACCTGTACGCCAACATTTGCTTTTCGGCATCATGAAACATCGGGAAG  
CGTACCTACAGACTATCTCAGCTGATGGTGTATGTGTTAAAACCAGCATCAAAATCCC  
AAGTCTCATAACTGATGAAAGGAGGGAGCACGAAAACTGGTTCGGGCAATTCTGAATT  
CCACTTTTATTCCATAAATGTTGGGGGATTTTTCAAGCTCCGAGCTGGTGAAGAAATTAG  
CATTACAGGTGTCCAACCCTTCCCTGCTGGATCCGGATCAAGATGCGACGTAATTTGGGGC  
TTTTCAAAGTTCAGGACATAGACTGAGACTCATTTTCGTGGAACATTAGCATGGATGTCTTA  
GATGTTTGGAAACTTCTTAAAAAATGGATGATGTCTATACATGTGTAAGACTACTAAGAG  
ACATGGCCACGGTGTATGAAACTCACAGCCCTCTCTTTGAGCCTGTACAGGTTGTGTA  
TATGTAAGTCCATAGGTGATGTTAGATTGATGGTGATTACACAACGGTTTTTACAATTTT  
GTAATGATTTCTAGAAATTGAACCAGATTGGGAGAGGTATTCCGATGCTTATGAAAACT  
TACACGTGAGCTATGGAAGGGGGTACAGTCTCTGGGTCTAACCCCTGGACATGTGCCAC  
TGAGAACCCTTGAATTAAGAGGATGCCATGTCATTGCAAAGAAATGATAGTGTGAAGGGT  
TAAGTCTTTTTGAATTGTTACATTGCGCTGGGACCTGCAAATAAGTTCTTTTTTTCTAAT  
GAGGAGAGAAAAATATATGTATTTTATATAATGTCTAAAAGTTATATTTTCAGGTGTAATG  
TTTTCTGTGCAAAGTTTTGTAAATTATATTTGTGCTATAGTATTTGATTTCAAAATATTTA  
AAAATGTCTCACTGTTGACATATTTAATGTTTTAAATGTACAGATGTATTTAACTGGTGC  
ACTTTGTAATTTCCCTGAAGGTAAGTCTGAGCTAAGGGGGCAGAATACTGTTTCTGGTGAC  
CACATGTAGTTTTATTTCTTTATTCTTTTTAACTTAATAGAGTCTTCAGACTTGTCAAAAC  
TATGCAAGCAAAATAAATAAATAAATAAATAAATAAATAAATAAATAAATAAATAAATAAATAA  
AAAGGATACATAAAGGCTACTGAAATCTGTGAGGATATTTATGCAATTATTGAACAGG  
TGTCTTTTTTTACAAGGCTACAAATTGTAATTTTTGTTTTCTTTTTTTTTTCCCATAGAAAA  
TGTACTATAGTTTATCAGCCAAAAACAATCCACTTTTTTAATTTAGTGAAAGTTATTTTA  
TTATACTGTACAATAAAGCATTGTCTCTGAATGTTAATTTTTTGGTACAAAAAATAAAT  
TTGTACGAAAACCTGAAAAAAA

|         | Sequence                   | Tm |
|---------|----------------------------|----|
| Forward | CCTCACCATCAATGCTGCCA       | 62 |
| Reverse | TGGTACCAAGAGGACAGAGTGACTTT | 60 |

Genomic DNA Control from Beta Actin Intron Sequence

|         | Sequence              | Tm |
|---------|-----------------------|----|
| Forward | CTTAGCTTGGTGAGGGTGGGC | 62 |
| Reverse | GCTCTCTGGGTGCTGGGATT  | 60 |

Tnfsf8 (CD30L)

>NM\_009403 NM\_009403 Mus musculus tumor necrosis factor (ligand) superfamily, member 8 (Tnfsf8), mRNA. 11/2006

GAGATTAATCCCAGGCGATGAAAAATGAACCTCTCCCCACCCCTTGCAGCCACCCCTTCGC  
 CTCACGCCCCCAGAGAAGAGTTTCTCCATCCGGCAACTGGTGAAGGCTTTTTTCCAAGTC  
 ACATGATCCAGGATGCAGGGGAAAATCCTTCTTGGAACAGAGCTGGGTACAGAACCGAAT  
 CAGATGAGGAGAGATAAGGTGTGATGTGGGACAGACTATATAAAGCATGGAGCCAGGGCT  
 GCAACAAGCAGGCAGCTGTGGGGCTCCTTCCCCTGACCCAGCCATGCAGGTGCAGCCCGG  
 CTCGGTAGCCACCCCTGGAGAAGCACGAGGCCCTGGAGAAGCACAAGTCGCAGCTACTT  
 CTACCTCAGCACCCGACTGGTGTGCCTTGTGTGGCAGTGGCGATCATTCTGGTACT  
 GGTAGTCCAGAAAAAGGACTCCACTCCAATAACAAGTGAAGGCCCCCTTAAAGGAGG  
 AAATTGCTCAGAGGATCTCTTCTGTACCCTGAAAAAGTACTCCATCCAAGAAGTCATGGGC  
 CTACCTCCAAGTGTCAAAGCATCTCAACAATACCAAAGTGTGCATGGAACGAAGATGGCAC  
 CATCCACGGACTCATATACCAGGACGGGAACCTGATAGTCCAATTCCCTGGCTTGTACTT  
 CATCGTTTTGCCAACTGCAGTTTCTCGTGCAGTGTCAAATCATTCTGTGGACCTGACATT  
 GCAGCTCCTCATCAATTCCAAGATCAAAAAGCAGACGTTGGTAACAGTGTGTGAGTCTGG  
 AGTTCAGAGTAAGAACATCTACCAGAATCTCTCTCAGTTTTTGTGCTGATTACTTACAGGT  
 CAACTCTACCATATCAGTCAGGGTGGATAATTTCCAGTATGTGGATACAAACACTTTCCC  
 TCTTGATAATGTGCTATCCGTCTTCTTATATAGTAGCTCAGACTGAATAGTTGTTCTTAA  
 CCTTTATGAAAATGCTGTCTACCATAACAGTACTTCATCTGTCCAAACATGGGCCAAAGAA  
 AATATTAGGACAACCTCAAACCTAAGCATGTGAGTTAGTGCATTTCTCTTTCTGTCTTTGG  
 AAAAAACAAAACCCAGGATTTAGAAAAGTGGAGTCTCCTTCAGATGCACAAAACAGGAAAAGA  
 ATGTGATATGTGCACAGAGACCTACTTGGGCACTAGAAGGGGTTGAGTTGTCCCAGTATA  
 ACCACTAATTCAGTACCTTGGACATTTTTCTTCCCCTGGAACCTTGGGGTCTGAATCT  
 GGAAAAGTAGGAGATGAGATTTACATTTCCCAATATTTTTCTTCAACTCAGAAGACGAGA  
 CTGTGGAGCTGAGCTCCCTACACAGATGAAGGCCTCCCATGGCATGAGGAAAATGATGGT  
 ACCAGTAATGTCTGTCTGACTGTCTCAGCAAGTCCTAAGGACTTCCATGCTGCCTTG  
 TTGAAAGATACTTAACCTCTTGTAAATGGGCAAAGTGCCTGTCTCTCACTGAGGGGAG  
 TAGCTGCTGCCATCTCCTGAGACATACATGGAGACATTTTCTGCCCAAATTCATTTCTGT  
 GTGCAGTTTTTAAAGTATTTCCCAAAAAGTTCTTGACAATGAGAACTTTGAATGTGGGAAG  
 AGCTTCTGGACAGCAAAACATTAACAGCTTCTCCTGACCAGAGAGACCATGCAAGCTTGGT  
 CTTAGACCCATCAAGCTTGGAGTTTCTACATTGTGGGAGACAGACTTTTGACAAAACATT  
 TGAGTTGATGTCTGGGCCCTGGGAGTTCTCCTTTCAGTAAGGAGAGCAAGCCGTTCTAGT  
 GCTGTGTGAGAGGATGGAGTAAAATAGACACTTTTTCTGAAGGAAAGGAGAACAAGTTCC  
 AGAAAAAGGCTAGAAAATGTTTTAAAAGGAAAAGAAAAAACTCAGCTTTTTCTCATATGAGA  
 GGAACCCAGAAAAACAACACTGAAAAAGAAGAGTGGCTCTGTCAACCTCCTCTTAGGTCT  
 CCTCCTCTCTAGTTATTGGGAAAGGAGTTGCATGGTACAGGACAAGTTCTGGTGTGTGGT  
 CAAATAGAATCAGATGTGGAGAACACCATGCAGAGAATAAGGAGACCTGTCATATTTGTG  
 TTGTAATCAAATGAGGGGCAAATGAATCTTAGGCTAAATCAAATAACAGTCTCTGTCAAG  
 CTGTGCTCAGAAAAGTCAACCACTGAAGATGGAGGGTGGAGGCACGTCATTTAAAAAAAGTG  
 AAATGTAGC

|         | Sequence                | Tm |
|---------|-------------------------|----|
| Forward | GAAGAGTTTCTCCATCCGGCA   | 60 |
| Reverse | TGCATCCTGGATCATGTGACTTG | 62 |
